# Supplementary material for: Oxygen supersaturation adds resistance to a cnidarian: Symbiodiniaceae holobiont under moderate warming in experimental settings
Source: Frontiers journal article supplement (doi:10.3389/fmars.2024.1305674), 2024-06-12
Supplement: Data_Sheet_2.docx [file Data_Sheet_2.docx]

Supplementary Materials

Table S1. Summary of the experiment, all the measurements taken, and biological variables measured. TA = Total Alkalinity, pH = pH measurements, DO = Dissolved Oxygen measurements, PAM = Pulse Amplitude Modulator for measuring Photochemical Efficiency, Pulsations = Bell pulsation rate, Samples = Snap freezing of the oral arms for symbiont count, chlorophyll analysis, protein analysis, microbiome, Catalase, Superoxide Dismutase, Glutathione-S-Transferase, Size = Measuring bell diameter, Observations = observation of bleaching, lack of pulsations, discoloration, and tissue melting.

**
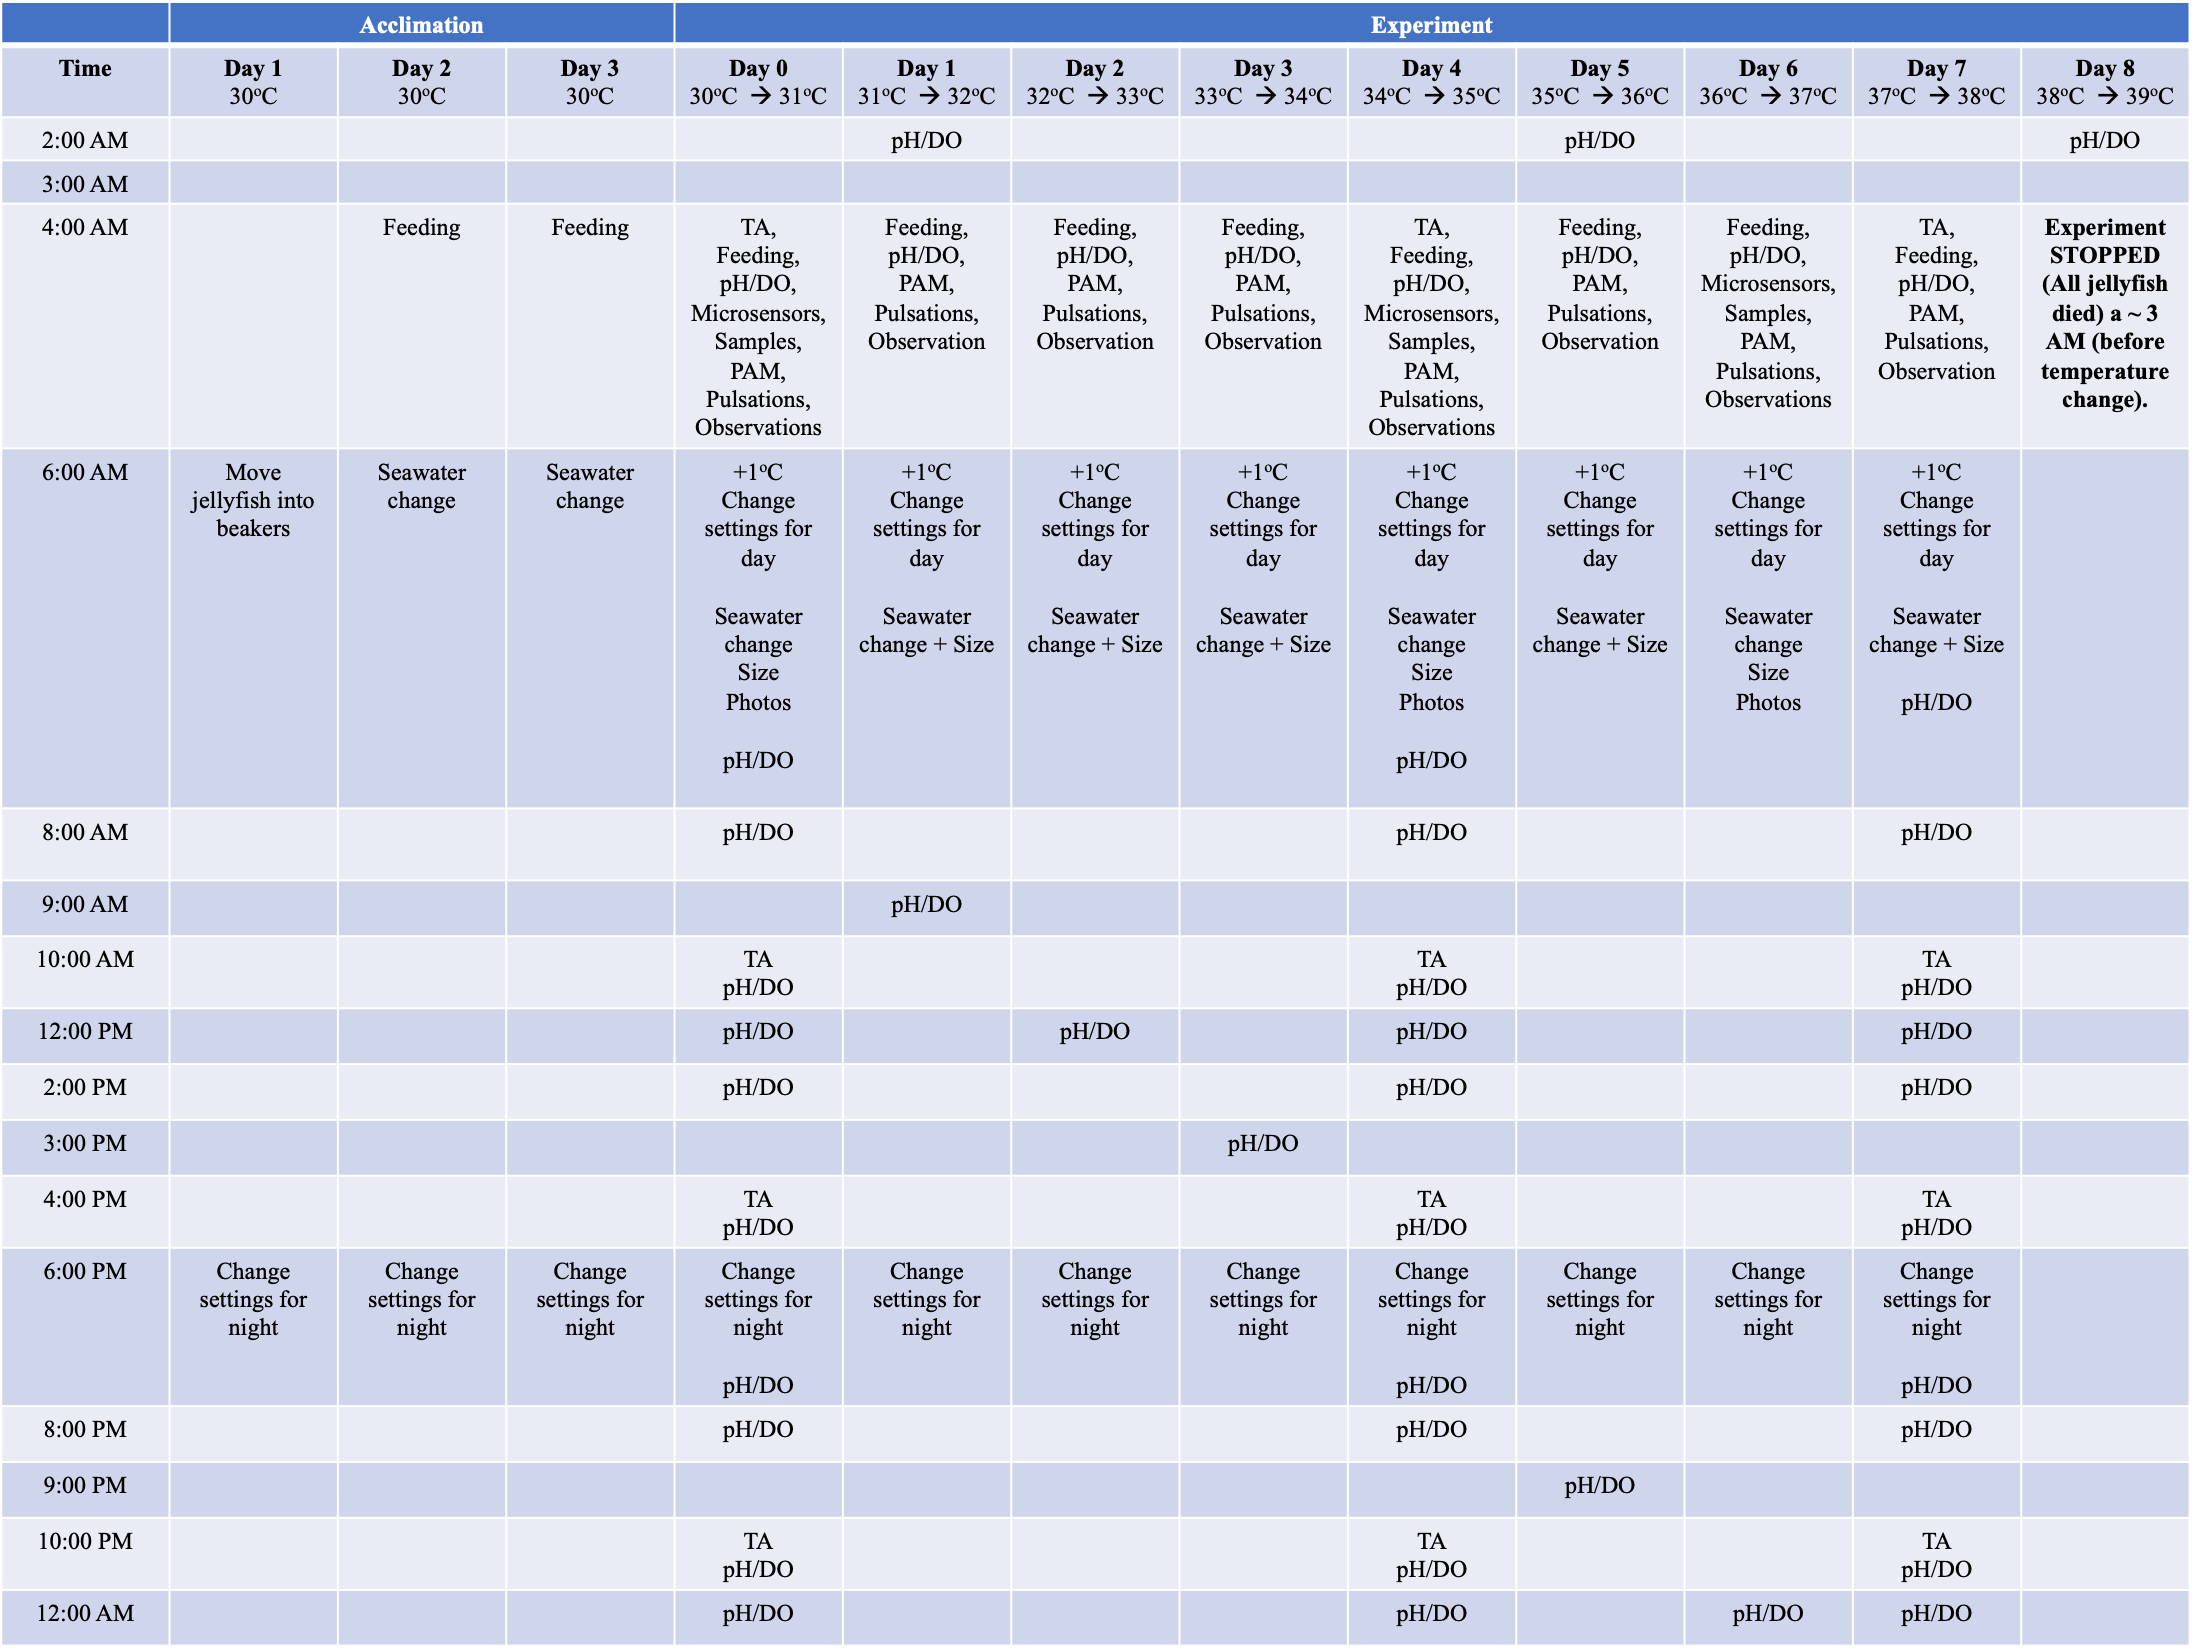
**

**
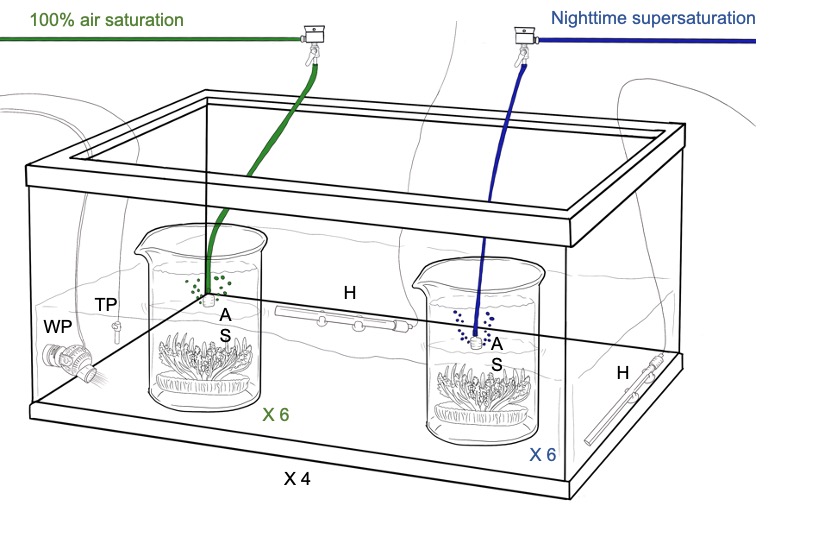
**

**Figure S1.** Schematic representation of the experimental set-up. Each water bath (4 in total) was equipped with a water pump (WP), a temperature probe (TP), and two heaters (H). The water baths were used to control the temperature, and water pumps maintained a homogeneous temperature. One *C. andromeda* holobiont was placed individually into glass aquaria and 12 glass aquaria were positioned in each water bath (6 per treatment, 48 in total). Gas mixtures for “Nighttime supersaturation” (green) and “100% air saturation” (blue) were mixed in a stainless-steel manifold and then delivered in equal quantities to each glass aquarium using air stones (AS) to improve gas diffusion in seawater. Secondary stainless-steel manifolds were used to manually adjust the flow rates.


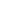


**Figure S2.** Average temperature during the experiment. Bars represent standard deviation (± 1 SD). The blue line represents the “Nighttime supersaturation” treatment, whereas the green line represents the “100% air saturation” treatment. Average temperature is shown in the y-axis, whereas the x-axis shows the day number.

A

B

**Figure S3. (A)** Average dissolved oxygen in mg L-1. Bars represent standard deviation (± 1 SD). The blue line represents the “Nighttime supersaturation” treatment, whereas the green line represents the “100% air saturation” treatment. Average dissolved oxygen is shown in the y-axis, whereas the x-axis shows the hours of the day. **(B)** Average dissolved oxygen in % air saturation. Bars represent standard deviation (± 1 SD). The blue line represents the “Nighttime supersaturation” treatment, whereas the green line represents the “100% air saturation” treatment. Average dissolved oxygen is shown in the y-axis, whereas the x-axis shows the hours of the day.

**Figure S4.** Average pH over time, during the days. Bars represent standard deviation (± 1 SD). The blue line represents the “Nighttime supersaturation” treatment, whereas the green line represents the “100% air saturation” treatment.

**Figure S5.** Average Total Alkalinity (µmol Kg-1). Bars represent standard deviation (± 1 SD). The blue line represents the “Nighttime supersaturation” treatment, whereas the green line represents the “100% air saturation” treatment.

**Figure S6.** Average partial pressure of CO2 (µatm). Bars represent standard deviation (± 1 SD). The blue line represents the “Nighttime supersaturation” treatment, whereas the green line represents the “100% air saturation” treatment.

**Figure S7.** Average bell pulsation rate (BPR) min-1 of *Cassiopea* is shown in the y-axis, whereas the x-axis shows the treatment. In blue, the average in specimens exposed to “Nighttime supersaturation”, and in green, the average in specimens exposed to “100% air saturation”. The black line in the middle of the boxes indicates the mean and the whiskers represent the standard error (±SE).

**Figure S8.** Average symbiont number x 104 cells ml-1 per each treatment. In blue, the average in specimens exposed to “Nighttime supersaturation”, and in green, the average in specimens exposed to “100% air saturation”. The black line in the middle of the boxes indicates the mean and the whiskers represent the standard error (±SE).

**Figure S9.** Average symbiont number x 104 cells ml-1 per each treatment and temperature (Celsius). In blue, the average in specimens exposed to “Nighttime supersaturation”, and in green, the average in specimens exposed to “100% air saturation”. The error bars show the standard error (±1 SE).

| Variable |  |  | Size percent change |  |  | Bell pulsation rate (BPR) |  |  | Photochemical efficiency |
| --- | --- | --- | --- | --- | --- | --- | --- | --- | --- |
| Transformation |  |  | - |  |  | - |  |  | Exp |
| Information Criterion (smaller-is-better form) |  |  | BIC= 528.028  AIC= 513.240 |  |  | BIC= 1219.961 AIC= 1207.418 |  |  | BIC=-103.873  AIC=-110.818 |
| Repeated covariance type |  |  | AR(1) |  |  | CS |  |  | AR(1) |  |
| Source of variation/ *Estimate of covariance* | **Df** | **Denominator Df** | ***P*** | **Df** | **Denominator Df** | ***P*** | ***Df*** | **Denominator Df** | ***P*** |
| Oxygen | 1 | 10.000 | 0.775 *F=1.599* | 7 | 38.913 | 0.386  *F=0.773* | **1** | 95.397 | 0.478  *F=0.506* |
| Temperature | 7 | 70.000 | **<0.001** *F=-22.771* | 1 | 37.977 | **0.002** *F=4.062* | 7 | 186.671 | **<0.001** *F=15.575* |
| Oxygen x Temperature | 7 | 70.000 | **0.014** *F=-19.189* | 7 | 38.916 | 0.121 *F=1.780* | 7 | 186.671 | 0. 797 *F=0.548* |
| Tank  Tank (*Oxygen x Temperature*) |  |  | ***P / Variance***  ***(estimate ± 1SE)***  -  - |  |  | ***P / Variance***  ***(estimate ± 1SE)***  *7.681±8.931*  1.381±4.002 |  |  | ***P / Variance***  ***(estimate ± 1SE)***  *-*  *-* |

**Table S2.** Summary of results for repeated Linear Mixed Models (LMMs) comparing size percent change, bell pulsation rate (BPR), and photochemical efficiency between the two oxygen treatments (“Nighttime supersaturation” and “100% air saturations”) during the experiment (sampled at 30oC, 34oC, and 36oC). Df= degrees of freedom. AIC =Akaike information criterion, BIC = Bayesian information criterion. SE = standard error. *P* values in bold are statistically significant (*P* < 0.05, α = 0.05). The random term (or ‘block’): Tank (Oxygen x Temperature) was retained in the model only when significant.

**Table S3.** Pairwise comparison among the interactions of temperatures for size percent change (PC, %). All pair comparisons that showed significant results are in bold (*p*-value <0.05). Df= degrees of freedom St. Error = Standard Error.

| **(I) Temperature** | **(J) Temperature** | **Mean Difference (I-J)** | **Std. Error** | **df** | **p-value** | **95% Confidence Interval for Difference** | |
| --- | --- | --- | --- | --- | --- | --- | --- |
| Lower Bound | Upper Bound |
| 30 | 31 | 2.645 | 2.665 | 70.000 | .324 | -2.669 | 7.959 |
| 32 | .413 | 2.665 | 70.000 | .877 | -4.901 | 5.728 |
| 33 | -4.659 | 2.665 | 70.000 | .085 | -9.973 | .655 |
| 34 | 8.430* | 2.665 | 70.000 | .056 | 3.115 | 13.744 |
| 35 | -4.773 | 2.665 | 70.000 | .078 | -10.087 | .542 |
| 36 | 2.336 | 2.665 | 70.000 | .384 | -2.978 | 7.650 |
| 37 | 23.176* | 2.665 | 70.000 | **<.001** | 17.861 | 28.490 |
| 31 | 30 | -2.645 | 2.665 | 70.000 | .324 | -7.959 | 2.669 |
| 32 | -2.232 | 2.665 | 70.000 | .405 | -7.546 | 3.083 |
| 33 | -7.304* | 2.665 | 70.000 | **.008** | -12.618 | -1.990 |
| 34 | 5.785* | 2.665 | 70.000 | **.033** | .470 | 11.099 |
| 35 | -7.418* | 2.665 | 70.000 | **.007** | -12.732 | -2.103 |
| 36 | -.309 | 2.665 | 70.000 | .908 | -5.623 | 5.005 |
| 37 | 20.531* | 2.665 | 70.000 | **<.001** | 15.216 | 25.845 |
| 32 | 30 | -.413 | 2.665 | 70.000 | .877 | -5.728 | 4.901 |
| 31 | 2.232 | 2.665 | 70.000 | .405 | -3.083 | 7.546 |
| 33 | -5.073 | 2.665 | 70.000 | **.061** | -10.387 | .242 |
| 34 | 8.016* | 2.665 | 70.000 | **.004** | 2.702 | 13.331 |
| 35 | -5.186 | 2.665 | 70.000 | .056 | -10.500 | .128 |
| 36 | 1.923 | 2.665 | 70.000 | .473 | -3.392 | 7.237 |
| 37 | 22.762* | 2.665 | 70.000 | **<.001** | 17.448 | 28.077 |
| 33 | 30 | 4.659 | 2.665 | 70.000 | .085 | -.655 | 9.973 |
| 31 | 7.304* | 2.665 | 70.000 | **.008** | 1.990 | 12.618 |
| 32 | 5.073 | 2.665 | 70.000 | .061 | -.242 | 10.387 |
| 34 | 13.089* | 2.665 | 70.000 | **<.001** | 7.774 | 18.403 |
| 35 | -.114 | 2.665 | 70.000 | .966 | -5.428 | 5.201 |
| 36 | 6.995* | 2.665 | 70.000 | **.011** | 1.681 | 12.309 |
| 37 | 27.835* | 2.665 | 70.000 | **<.001** | 22.520 | 33.149 |
| 34 | 30 | -8.430* | 2.665 | 70.000 | **.002** | -13.744 | -3.115 |
| 31 | -5.785* | 2.665 | 70.000 | **.033** | -11.099 | -.470 |
| 32 | -8.016* | 2.665 | 70.000 | **.004** | -13.331 | -2.702 |
| 33 | -13.089* | 2.665 | 70.000 | **<.001** | -18.403 | -7.774 |
| 35 | -13.202* | 2.665 | 70.000 | **<.001** | -18.517 | -7.888 |
| 36 | -6.094* | 2.665 | 70.000 | **.025** | -11.408 | -.779 |
| 37 | 14.746* | 2.665 | 70.000 | **<.001** | 9.432 | 20.060 |
| 35 | 30 | 4.773 | 2.665 | 70.000 | .078 | -.542 | 10.087 |
| 31 | 7.418* | 2.665 | 70.000 | **.007** | 2.103 | 12.732 |
| 32 | 5.186 | 2.665 | 70.000 | .056 | -.128 | 10.500 |
| 33 | .114 | 2.665 | 70.000 | .966 | -5.201 | 5.428 |
| 34 | 13.202* | 2.665 | 70.000 | **<.001** | 7.888 | 18.517 |
| 36 | 7.109* | 2.665 | 70.000 | **.009** | 1.794 | 12.423 |
| 37 | 27.948* | 2.665 | 70.000 | **<.001** | 22.634 | 33.263 |
| 36 | 30 | -2.336 | 2.665 | 70.000 | .384 | -7.650 | 2.978 |
| 31 | .309 | 2.665 | 70.000 | .908 | -5.005 | 5.623 |
| 32 | -1.923 | 2.665 | 70.000 | .473 | -7.237 | 3.392 |
| 33 | -6.995* | 2.665 | 70.000 | **.011** | -12.309 | -1.681 |
| 34 | 6.094* | 2.665 | 70.000 | **.025** | .779 | 11.408 |
| 35 | -7.109* | 2.665 | 70.000 | **.009** | -12.423 | -1.794 |
| 37 | 20.840* | 2.665 | 70.000 | **<.001** | 15.525 | 26.154 |
| 37 | 30 | -23.176* | 2.665 | 70.000 | **<.001** | -28.490 | -17.861 |
| 31 | -20.531* | 2.665 | 70.000 | **<.001** | -25.845 | -15.216 |
| 32 | -22.762* | 2.665 | 70.000 | **<.001** | -28.077 | -17.448 |
| 33 | -27.835* | 2.665 | 70.000 | **<.001** | -33.149 | -22.520 |
| 34 | -14.746* | 2.665 | 70.000 | **<.001** | -20.060 | -9.432 |
| 35 | -27.948* | 2.665 | 70.000 | **<.001** | -33.263 | -22.634 |
| 36 | -20.840* | 2.665 | 70.000 | **<.001** | -26.154 | -15.525 |

**Table S4.** Pairwise comparison among the interactions of temperature and oxygen treatment for size percent change (PC, %). All pair comparisons that showed significant results are in bold (*p*-value <0.05). Df= degrees of freedom St. Error = Standard Error.

|  |
| --- |
| **Temperature** | **(I) Treatment** | **(J) Treatment** | **Mean Difference (I-J)** | **Std. Error** | **Df** | **p-value** | **95% Confidence Interval for Difference** | |
| Lower Bound | Upper Bound | |
| 30 | Nighttime supersaturation | 100% air saturation | 1.449E-12 | 3.586 | 74.333 | 1.000 | -7.144 | 7.144 | |
|
| 31 | Nighttime supersaturation | 100% air saturation | 8.396 | 3.586 | 74.333 | .072 | 1.251 | 15.540 | |
|
| 32 | Nighttime supersaturation | 100% air saturation | 7.768 | 3.586 | 74.333 | .133 | .624 | 14.913 | |
|
| 33 | Nighttime supersaturation | 100% air saturation | -1.218 | 3.586 | 74.333 | .735 | -8.362 | 5.927 | |
|
| 34 | Nighttime supersaturation | 100% air saturation | -4.831 | 3.586 | 74.333 | .182 | -11.975 | 2.313 | |
|
| 35 | Nighttime supersaturation | 100% air saturation | 14.791 | 3.586 | 74.333 | .076 | 7.647 | 21.936 | |
|
| 36 | Nighttime supersaturation | 100% air saturation | -19.584* | 3.586 | 74.333 | **<.001** | -26.728 | -12.440 | |
|
| 37 | Nighttime supersaturation | 100% air saturation | 7.553 | 3.586 | 74.333 | .089 | .409 | 14.698 | |
|
|  |  |  |  |  |  |  |  |  | |

**Table S5.** Pairwise comparison among the interactions of temperatures for bell pulsation rate (BPR) min-1. All pair comparisons that showed significant results are in bold (*p*-value <0.05). Df= degrees of freedom St. Error = Standard Error.

| **(I) Temperature** | **(J) Temperature** | **Mean Difference (I-J)** | **Std. Error** | **Df** | **p-value** | **95% Confidence Interval for Difference** | |
| --- | --- | --- | --- | --- | --- | --- | --- |
| Lower Bound | Upper Bound |
| 30 | 31 | -3.647 | 1.852 | 140.760 | .051 | -7.308 | .014 |
| 32 | -1.402 | 1.784 | 139.054 | .433 | -4.929 | 2.126 |
| 33 | -3.533 | 1.877 | 146.046 | .062 | -7.243 | .176 |
| 34 | -4.814* | 1.840 | 137.179 | **.010** | -8.453 | -1.175 |
| 35 | -4.057* | 2.052 | 137.601 | .050 | -8.114 | -1.269E-5 |
| 36 | -9.153* | 1.958 | 138.421 | **<.001** | -13.025 | -5.281 |
| 37 | -8.051* | 2.490 | 136.912 | **.002** | -12.974 | -3.128 |
| 31 | 30 | 3.647 | 1.852 | 140.760 | .051 | -.014 | 7.308 |
| 32 | 2.245 | 1.762 | 137.297 | .205 | -1.238 | 5.729 |
| 33 | .114 | 1.807 | 137.145 | .950 | -3.459 | 3.686 |
| 34 | -1.167 | 1.825 | 136.554 | .524 | -4.776 | 2.443 |
| 35 | -.410 | 2.057 | 138.017 | .842 | -4.477 | 3.658 |
| 36 | -5.506* | 1.943 | 136.700 | **.005** | -9.348 | -1.664 |
| 37 | -4.404 | 2.501 | 138.097 | .081 | -9.350 | .542 |
| 32 | 30 | 1.402 | 1.784 | 139.054 | .433 | -2.126 | 4.929 |
| 31 | -2.245 | 1.762 | 137.297 | .205 | -5.729 | 1.238 |
| 33 | -2.132 | 1.764 | 138.478 | .229 | -5.619 | 1.356 |
| 34 | -3.412 | 1.776 | 137.244 | .057 | -6.925 | .100 |
| 35 | -2.655 | 2.014 | 138.938 | .190 | -6.636 | 1.327 |
| 36 | -7.751* | 1.899 | 137.895 | **<.001** | -11.506 | -3.996 |
| 37 | -6.649* | 2.471 | 138.893 | **.008** | -11.534 | -1.764 |
| 33 | 30 | 3.533 | 1.877 | 146.046 | .062 | -.176 | 7.243 |
| 31 | -.114 | 1.807 | 137.145 | .950 | -3.686 | 3.459 |
| 32 | 2.132 | 1.764 | 138.478 | .229 | -1.356 | 5.619 |
| 34 | -1.281 | 1.834 | 138.879 | .486 | -4.907 | 2.346 |
| 35 | -.523 | 2.053 | 138.927 | .799 | -4.582 | 3.535 |
| 36 | -5.620* | 1.943 | 137.986 | **.004** | -9.461 | -1.778 |
| 37 | -4.518 | 2.515 | 139.870 | .075 | -9.491 | .456 |
| 34 | 30 | 4.814* | 1.840 | 137.179 | **.010** | 1.175 | 8.453 |
| 31 | 1.167 | 1.825 | 136.554 | .524 | -2.443 | 4.776 |
| 32 | 3.412 | 1.776 | 137.244 | .057 | -.100 | 6.925 |
| 33 | 1.281 | 1.834 | 138.879 | .486 | -2.346 | 4.907 |
| 35 | .757 | 2.016 | 131.433 | .708 | -3.231 | 4.745 |
| 36 | -4.339* | 1.916 | 131.263 | **.025** | -8.130 | -.548 |
| 37 | -3.237 | 2.477 | 134.205 | .194 | -8.137 | 1.662 |
| 35 | 30 | 4.057* | 2.052 | 137.601 | .050 | 1.269E-5 | 8.114 |
| 31 | .410 | 2.057 | 138.017 | .842 | -3.658 | 4.477 |
| 32 | 2.655 | 2.014 | 138.938 | .190 | -1.327 | 6.636 |
| 33 | .523 | 2.053 | 138.927 | .799 | -3.535 | 4.582 |
| 34 | -.757 | 2.016 | 131.433 | .708 | -4.745 | 3.231 |
| 36 | -5.096* | 2.097 | 129.526 | **.016** | -9.245 | -.947 |
| 37 | -3.994 | 2.622 | 132.918 | .130 | -9.181 | 1.192 |
| 36 | 30 | 9.153* | 1.958 | 138.421 | **<.001** | 5.281 | 13.025 |
| 31 | 5.506* | 1.943 | 136.700 | **.005** | 1.664 | 9.348 |
| 32 | 7.751* | 1.899 | 137.895 | **<.001** | 3.996 | 11.506 |
| 33 | 5.620* | 1.943 | 137.986 | **.004** | 1.778 | 9.461 |
| 34 | 4.339* | 1.916 | 131.263 | **.025** | .548 | 8.130 |
| 35 | 5.096* | 2.097 | 129.526 | **.016** | .947 | 9.245 |
| 37 | 1.102 | 2.540 | 132.495 | .665 | -3.922 | 6.126 |
| 37 | 30 | 8.051* | 2.490 | 136.912 | **.002** | 3.128 | 12.974 |
| 31 | 4.404 | 2.501 | 138.097 | .081 | -.542 | 9.350 |
| 32 | 6.649* | 2.471 | 138.893 | **.008** | 1.764 | 11.534 |
| 33 | 4.518 | 2.515 | 139.870 | .075 | -.456 | 9.491 |
| 34 | 3.237 | 2.477 | 134.205 | .194 | -1.662 | 8.137 |
| 35 | 3.994 | 2.622 | 132.918 | .130 | -1.192 | 9.181 |
| 36 | -1.102 | 2.540 | 132.495 | .665 | -6.126 | 3.922 |

**Table S6.** Pairwise comparison among the interactions of temperatures for photochemical efficiency (Fv/Fm). All pair comparisons that showed significant results are in bold (*p*-value <0.05). Df = degrees of freedom St. Error = Standard Error.

| **(I) Temperature** | **(J) Temperature** | **Mean Difference (I-J)** | **Std. Error** | **Df** | **p-value** | **95% Confidence Interval for Difference** | |
| --- | --- | --- | --- | --- | --- | --- | --- |
| Lower Bound | Upper Bound |
| 30 | 31 | .050 | .036 | 159.610 | .159 | -.020 | .121 |
| 32 | .028 | .038 | 237.802 | .466 | -.047 | .102 |
| 33 | .188* | .038 | 235.082 | **<.001** | .114 | .262 |
| 34 | .125* | .042 | 235.614 | **.003** | .042 | .208 |
| 35 | .242* | .044 | 234.359 | **<.001** | .156 | .329 |
| 36 | .283* | .048 | 235.041 | **<.001** | .189 | .377 |
| 37 | .457* | .057 | 236.258 | **<.001** | .344 | .570 |
| 31 | 30 | -.050 | .036 | 159.610 | .159 | -.121 | .020 |
| 32 | -.023 | .036 | 157.693 | .528 | -.094 | .049 |
| 33 | .137* | .038 | 237.726 | **<.001** | .063 | .212 |
| 34 | .075 | .043 | 236.503 | .080 | -.009 | .159 |
| 35 | .192* | .044 | 234.642 | **<.001** | .104 | .279 |
| 36 | .233* | .048 | 235.156 | **<.001** | .138 | .327 |
| 37 | .406* | .058 | 236.302 | **<.001** | .293 | .520 |
| 32 | 30 | -.028 | .038 | 237.802 | .466 | -.102 | .047 |
| 31 | .023 | .036 | 157.693 | .528 | -.049 | .094 |
| 33 | .160* | .036 | 158.127 | **<.001** | .089 | .232 |
| 34 | .098* | .043 | 237.755 | **.023** | .014 | .182 |
| 35 | .215* | .044 | 235.537 | **<.001** | .127 | .302 |
| 36 | .256* | .048 | 235.270 | **<.001** | .160 | .351 |
| 37 | .429* | .058 | 236.308 | **<.001** | .315 | .543 |
| 33 | 30 | -.188* | .038 | 235.082 | **<.001** | -.262 | -.114 |
| 31 | -.137* | .038 | 237.726 | **<.001** | -.212 | -.063 |
| 32 | -.160* | .036 | 158.127 | **<.001** | -.232 | -.089 |
| 34 | -.063 | .041 | 180.145 | .126 | -.143 | .018 |
| 35 | .054 | .044 | 238.000 | .220 | -.033 | .141 |
| 36 | .095* | .048 | 235.853 | **.049** | .000 | .190 |
| 37 | .269* | .058 | 236.307 | **<.001** | .155 | .382 |
| 34 | 30 | -.125* | .042 | 235.614 | **.003** | -.208 | -.042 |
| 31 | -.075 | .043 | 236.503 | .080 | -.159 | .009 |
| 32 | -.098* | .043 | 237.755 | **.023** | -.182 | -.014 |
| 33 | .063 | .041 | 180.145 | .126 | -.018 | .143 |
| 35 | .117* | .046 | 160.765 | **.011** | .027 | .207 |
| 36 | .158* | .051 | 237.542 | **.002** | .056 | .259 |
| 37 | .331* | .061 | 237.182 | **<.001** | .212 | .451 |
| 35 | 30 | -.242* | .044 | 234.359 | **<.001** | -.329 | -.156 |
| 31 | -.192* | .044 | 234.642 | **<.001** | -.279 | -.104 |
| 32 | -.215* | .044 | 235.537 | **<.001** | -.302 | -.127 |
| 33 | -.054 | .044 | 238.000 | .220 | -.141 | .033 |
| 34 | -.117* | .046 | 160.765 | **.011** | -.207 | -.027 |
| 36 | .041 | .050 | 170.113 | .419 | -.059 | .141 |
| 37 | .215* | .062 | 237.888 | **<.001** | .093 | .336 |
| 36 | 30 | -.283* | .048 | 235.041 | **<.001** | -.377 | -.189 |
| 31 | -.233* | .048 | 235.156 | **<.001** | -.327 | -.138 |
| 32 | -.256* | .048 | 235.270 | **<.001** | -.351 | -.160 |
| 33 | -.095* | .048 | 235.853 | **.049** | -.190 | .000 |
| 34 | -.158* | .051 | 237.542 | **.002** | -.259 | -.056 |
| 35 | -.041 | .050 | 170.113 | .419 | -.141 | .059 |
| 37 | .174* | .062 | 183.069 | **.006** | .051 | .296 |
| 37 | 30 | -.457* | .057 | 236.258 | **<.001** | -.570 | -.344 |
| 31 | -.406* | .058 | 236.302 | **<.001** | -.520 | -.293 |
| 32 | -.429* | .058 | 236.308 | **<.001** | -.543 | -.315 |
| 33 | -.269* | .058 | 236.307 | **<.001** | -.382 | -.155 |
| 34 | -.331* | .061 | 237.182 | **<.001** | -.451 | -.212 |
| 35 | -.215* | .062 | 237.888 | **<.001** | -.336 | -.093 |
| 36 | -.174* | .062 | 183.069 | **.006** | -.296 | -.051 |

**Table S7.** Summary of results for repeated Linear Mixed Models (LMMs) comparing chlorophyll and symbiont density between the two oxygen treatments (“Nighttime supersaturation” and “100% air saturations”) during the experiment (sampled at 30oC, 34oC, and 36oC). Df = degrees of freedom. AIC =Akaike information criterion, BIC = Bayesian information criterion. SE = standard error. *P* values in bold are statistically significant (*P* < 0.05, α = 0.05). The random term (or ‘block’): Tank (Oxygen x Temperature) was retained in the model only when significant.

| Variable |  |  | Chlorophyll |  |  | Symbiont density |
| --- | --- | --- | --- | --- | --- | --- |
| Transformation |  |  | Ln(*x*) |  |  | Ln(*x*) |
| Information Criterion (smaller-is-better form) |  |  | BIC= 55.885 AIC= 48.400 |  |  | BIC= 126.304  AIC= 115.077 |
| Repeated covariance type |  |  | AR(1) Heterogeneous |  |  | AR(1) Heterogeneous |  |
| Source of variation/ *Estimate of covariance* | **Df** | **Denominator Df** | ***P*** | **Df** | **Denominator Df** | ***P*** |
| Oxygen | 1 | 30.102 | **<0.001**  *F=20.123* | 1 | 12.934 | 0.530 *F=0.417* |
| Temperature | 2 | 22.537 | **<0.001**  *F=185.352* | 2 | 7.988 | 0.179  *F=2.151* |
| Oxygen x Temperature | 2 | 22.537 | **0.019** *F=4.781* | 2 | 8.246 | 0.475 *F=0.816* |
| Tank  Tank (*Oxygen x Temperature*) |  |  | ***P / Variance (estimate ± 1SE)***  **-**  **-** |  |  | ***P / Variance (estimate ± 1SE)***  *0.169±0.233*  0.316±0.195 |

**Table S8.** Pairwise comparison among the interactions of temperature and oxygen treatment for chlorophyll (µg ml-1 mg protein-1). All pair comparisons that showed significant results are in bold (*p*-value <0.05). Df = degrees of freedom St. Error = Standard Error.

| **Temperature** | **(I) Treatment** | **(J) Treatment** | **Mean Difference (I-J)** | **Std. Error** | **Df** | **p-value** | **95% Confidence Interval for Differencec** | |
| --- | --- | --- | --- | --- | --- | --- | --- | --- |
| Lower Bound | Upper Bound |
| 30 | Nighttime supersaturation | 100% air saturation | .284 | .165 | 16.000 | .105 | -.067 | .634 |
|
| 34 | Nighttime supersaturation | 100% air saturation | .986 | .256 | 15.000 | **.002** | .441 | 1.531 |
|
| 36 | Nighttime supersaturation | 100% air saturation | .152 | .088 | 16.971 | .102 | -.034 | .338 |
|
|  |  |  |  |  |  |  |  |  |

**Table S9.** Pairwise comparison among the interactions of temperatures for chlorophyll (µg ml-1 mg protein-1). All pair comparisons that showed significant results are in bold (*p*-value <0.05). Df = degrees of freedom St. Error = Standard Error.

| **(I) Temperature** | **(J) Temperature** | **Mean Difference (I-J)** | **Std. Error** | **Df** | **p-value** | **95% Confidence Interval for Differencec** | |
| --- | --- | --- | --- | --- | --- | --- | --- |
| Lower Bound | Upper Bound |
| 30 | 34 | .746* | .152 | 25.910 | **<.001** | .433 | 1.059 |
| 36 | 1.750* | .094 | 24.505 | **<.001** | 1.557 | 1.943 |
| 34 | 30 | -.746* | .152 | 25.910 | **<.001** | -1.059 | -.433 |
| 36 | 1.004* | .135 | 18.535 | **<.001** | .720 | 1.287 |
| 36 | 30 | -1.750* | .094 | 24.505 | **<.001** | -1.943 | -1.557 |
| 34 | -1.004* | .135 | 18.535 | **<.001** | -1.287 | -.720 |

**Table S10.** Summary of results for repeated Linear Mixed Models (LMMs) comparing Glutathione-S-Trasferase and Superoxide Dismutase activity (umol ug-1 protein min-1) between the two oxygen treatments (“Nighttime supersaturation” and “100% air saturations”) during the experiment (sampled at 30oC, 34oC, and 36oC). Df= degrees of freedom. AIC =Akaike information criterion, BIC = Bayesian information criterion. SE = standard error. *P* values in bold are statistically significant (*P* < 0.05, α = 0.05). The random term (or ‘block’): Tank (Oxygen x Temperature) was retained in the model only when significant.

| Variable |  |  | Glutathione-S-Trasferase |  |  | Superoxide dismutase |
| --- | --- | --- | --- | --- | --- | --- |
| Transformation |  |  | Sqrt(*x*) |  |  | Ln(*x*) |
| Information Criterion (smaller-is-better form) |  |  | BIC= -557.679 AIC= -561.422 |  |  | BIC= 3.880 AIC= 0.137 |
| Repeated covariance type |  |  | CS |  |  | CS |  |
| Source of variation/ *Estimate of covariance* | **Df** | **Denominator Df** | ***P*** | **Df** | **Denominator Df** | ***P*** |
| Oxygen | 1 | 16.000 | 0.081 *F=3.468* | 1 | 15.383 | 0.444 *F=0.616* |
| Temperature | 2 | 32 | 0.226 *F=1.559* | 2 | 29.622 | 0.296  *F=1.374* |
| Oxygen x Temperature | 2 | 32 | 0.071 *F=2.869* | 2 | 31.320 | 0.183 *F=1.793* |
| Tank  Tank (*Oxygen x Temperature*) |  |  | ***P / Variance (estimate ± 1SE)***  **-**  **-** |  |  | ***P / Variance (estimate ± 1SE)***  *0.005±0.003*  *-* |

**Figure S10.** Average glutathione-S-transferase (GST) activity (µmol ug-1 protein min-1) per each temperature (30oC, 34oC, and 36oC). The blue line represents the “Nighttime supersaturation” treatment, whereas the green line represents the “100% air saturation” treatment. Bars represent standard error (± 1 SE). Average GST activity is shown in the x-axis, whereas the y-axis sows both temperature (Celsius) and day number.

**Figure S11.** Average superoxide dismutase (SOD) activity (U protein-1) per each temperature (30oC, 34oC, and 36oC). The blue line represents the “Nighttime supersaturation” treatment, whereas the green line represents the “100% air saturation” treatment. Bars represent standard error (± 1 SE). Average SOD activity is shown in the x-axis, whereas the y-axis sows both temperature (Celsius) and day number.

**
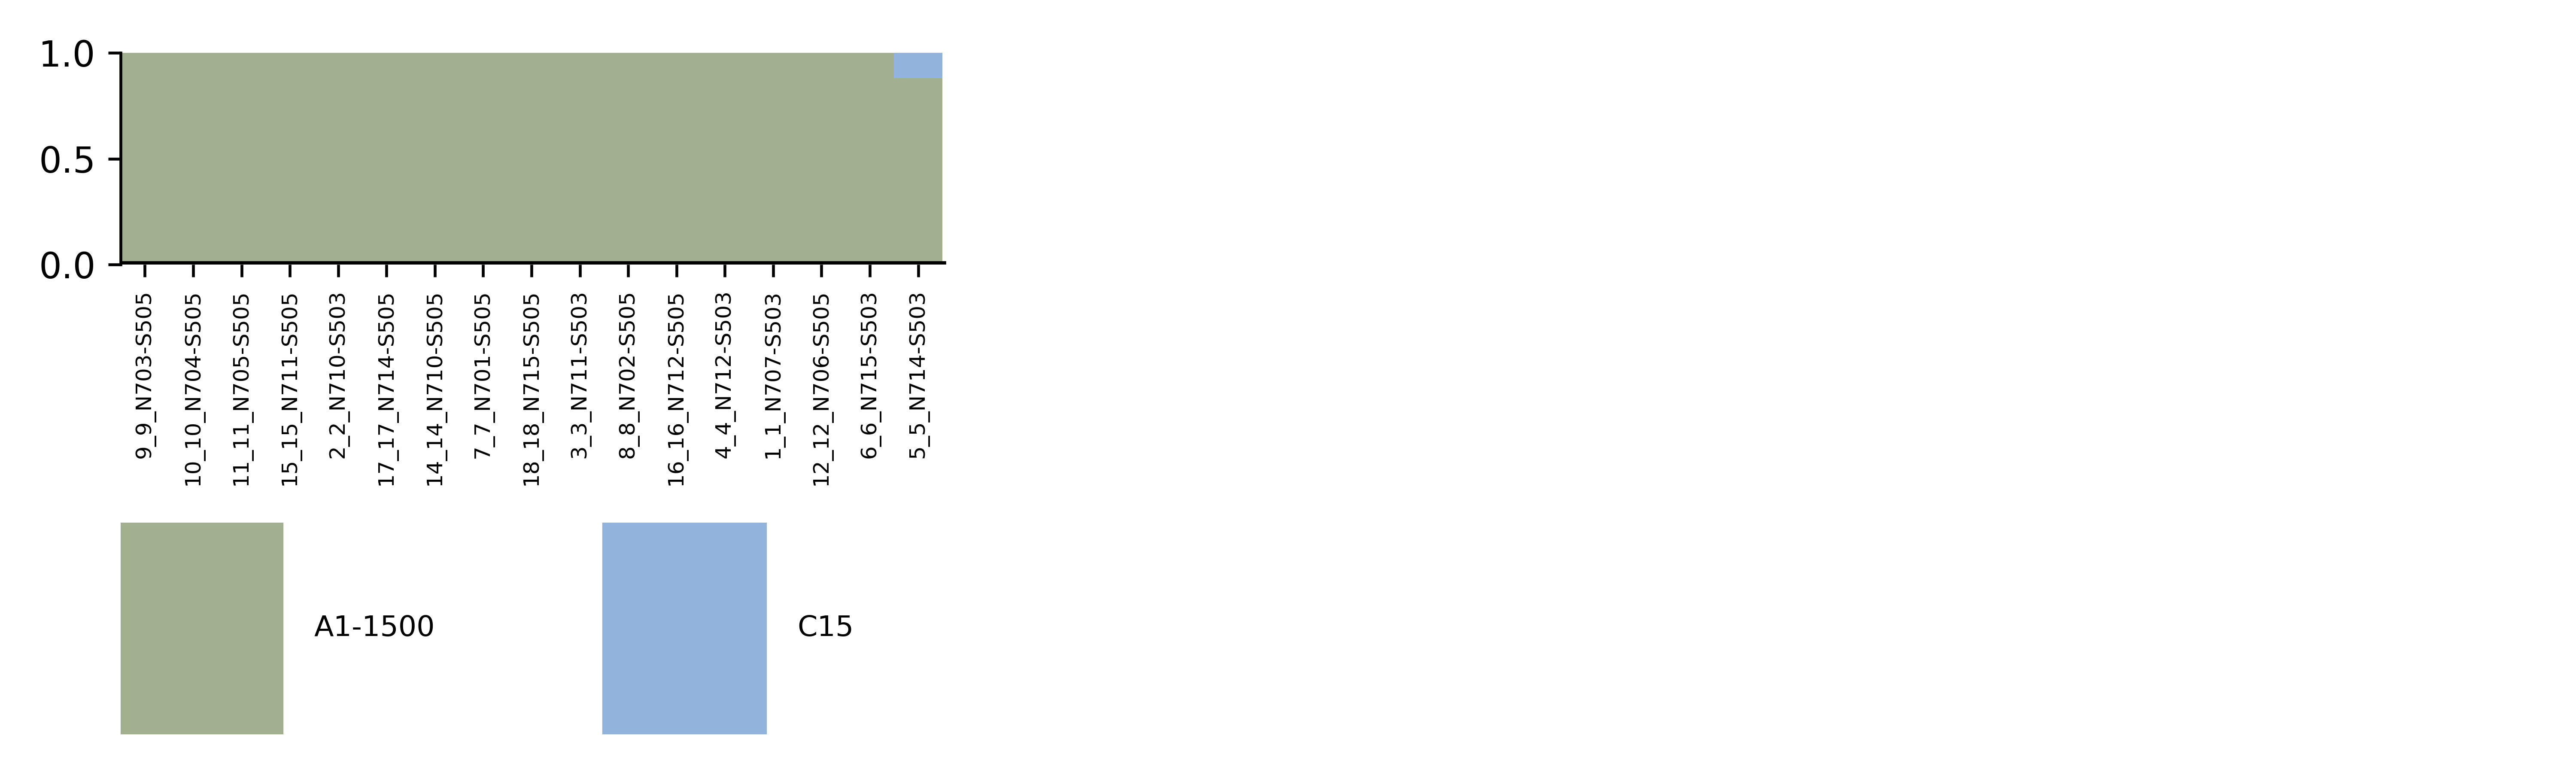
**

**Figure S12.** Symbiodiniaceae populations within *Cassiopea* spp samples (x-axis). Relative abundances (%, y-axis) of Symbiodiniaceae taxa within the *Cassiopea* sp. used in this study identified with the Symportal analytical framework. All individuals showed to be primarily colonized with Symbiodiniaceae A1-1500, corresponding to *Symbiodinium* *microadriaticum,* although a small proportion of clade C15 (genus Cladocopium; Hume et al., 2018).

**Table S11.** Number of OTUs and reads discarded from samples because they are not identified as bacteria. The number of OTUs and reads used are also reported.

| **Category** | **Number of OTUs** | **Number of reads** |
| --- | --- | --- |
| **Discarded** | **780** | **530617** |
| Chloroplast | 113 | 18171 |
| Mitochondria | 20 | 478 |
| Unclassified | 89 | 2475 |
| Archaea | 235 | 4985 |
| Singletons | 190 | 190 |
| Contaminants (DNA blank/PCR control) | 133 | 504318 |
| **Used for the analyses** | **14205** | **9735379** |

**Table S12.** Pairwise comparison among the interactions of temperature and oxygen treatment. All pair comparisons showed significant results (adjusted *p*-value <0.05).

| **Terms of comparison** | **Deviance** | **Adjusted *p*-values** |
| --- | --- | --- |
| 30°C-Supersaturation vs 38°C-Supersaturation | 1302.5 | 0.001 |
| 30°C-100% air saturation vs 38°C-Supersaturation | 1253.4 | 0.001 |
| 34°C-Supersaturation vs 38°C-Supersaturation | 1145.5 | 0.001 |
| 34°C-100% air saturation vs 38°C-Supersaturation | 1031.2 | 0.004 |
| 36°C-Supersaturation vs 38°C-Supersaturation | 991.6 | 0.005 |
| 30°C-Supersaturation vs 38°C-100% air saturation | 966 | 0.006 |
| 36°C-100% air saturation vs 38°C-Supersaturation | 962.9 | 0.006 |
| 30°C-100% air saturation vs 38°C-100% air saturation | 944.9 | 0.006 |
| 34°C-Supersaturation vs 38°C-100% air saturation | 915.8 | 0.006 |
| 30°C-Supersaturation vs 36°C-Supersaturation | 902.8 | 0.006 |
| 30°C-100% air saturation vs 36°C-Supersaturation | 882.9 | 0.007 |
| 30°C-Supersaturation vs 36°C-100% air saturation | 874.9 | 0.007 |
| 30°C-100% air saturation vs 36°C-100% air saturation | 805.9 | 0.012 |
| 38°C-Supersaturation vs 38°C-100% air saturation | 776.2 | 0.019 |
| 34°C-Supersaturation vs 36°C-Supersaturation | 717.4 | 0.027 |
| 34°C-Supersaturation vs 36°C-100% air saturation | 706.7 | 0.033 |
| 36°C-Supersaturation vs 36°C-100% air saturation | 704.7 | 0.033 |
| 36°C-Supersaturation vs 38°C-100% air saturation | 703.7 | 0.033 |
| 30°C-100% air saturation vs 34°C-100% air saturation | 696.3 | 0.033 |
| 34°C-100% air saturation vs 38°C-100% air saturation | 695.2 | 0.033 |
| 30°C-Supersaturation vs 34°C-100% air saturation | 690.9 | 0.033 |
| 36°C-100% air saturation vs 38°C-100% air saturation | 672.4 | 0.033 |
| 30°C-Supersaturation vs 34°C-Supersaturation | 665.4 | 0.033 |
| 30°C-100% air saturation vs 34°C-Supersaturation | 664.4 | 0.033 |
| 34°C-Supersaturation vs 34°C-100% air saturation | 580.1 | 0.033 |
| 34°C-100% air saturation vs 36°C-Supersaturation | 560.5 | 0.033 |
| 34°C-100% air saturation vs 36°C-100% air saturation | 551.5 | 0.033 |
| 30°C-Supersaturation vs 30°C-100% air saturation | 473 | 0.033 |

**Figure S13.** Rarefaction curves of bacteria across sample categories, Artemia (food source), tentacle (collected from jellyfish subject to different thermal/oxygen treatment) and water from the tanks used to incubate jellyfish, sampling site, and water pipe.


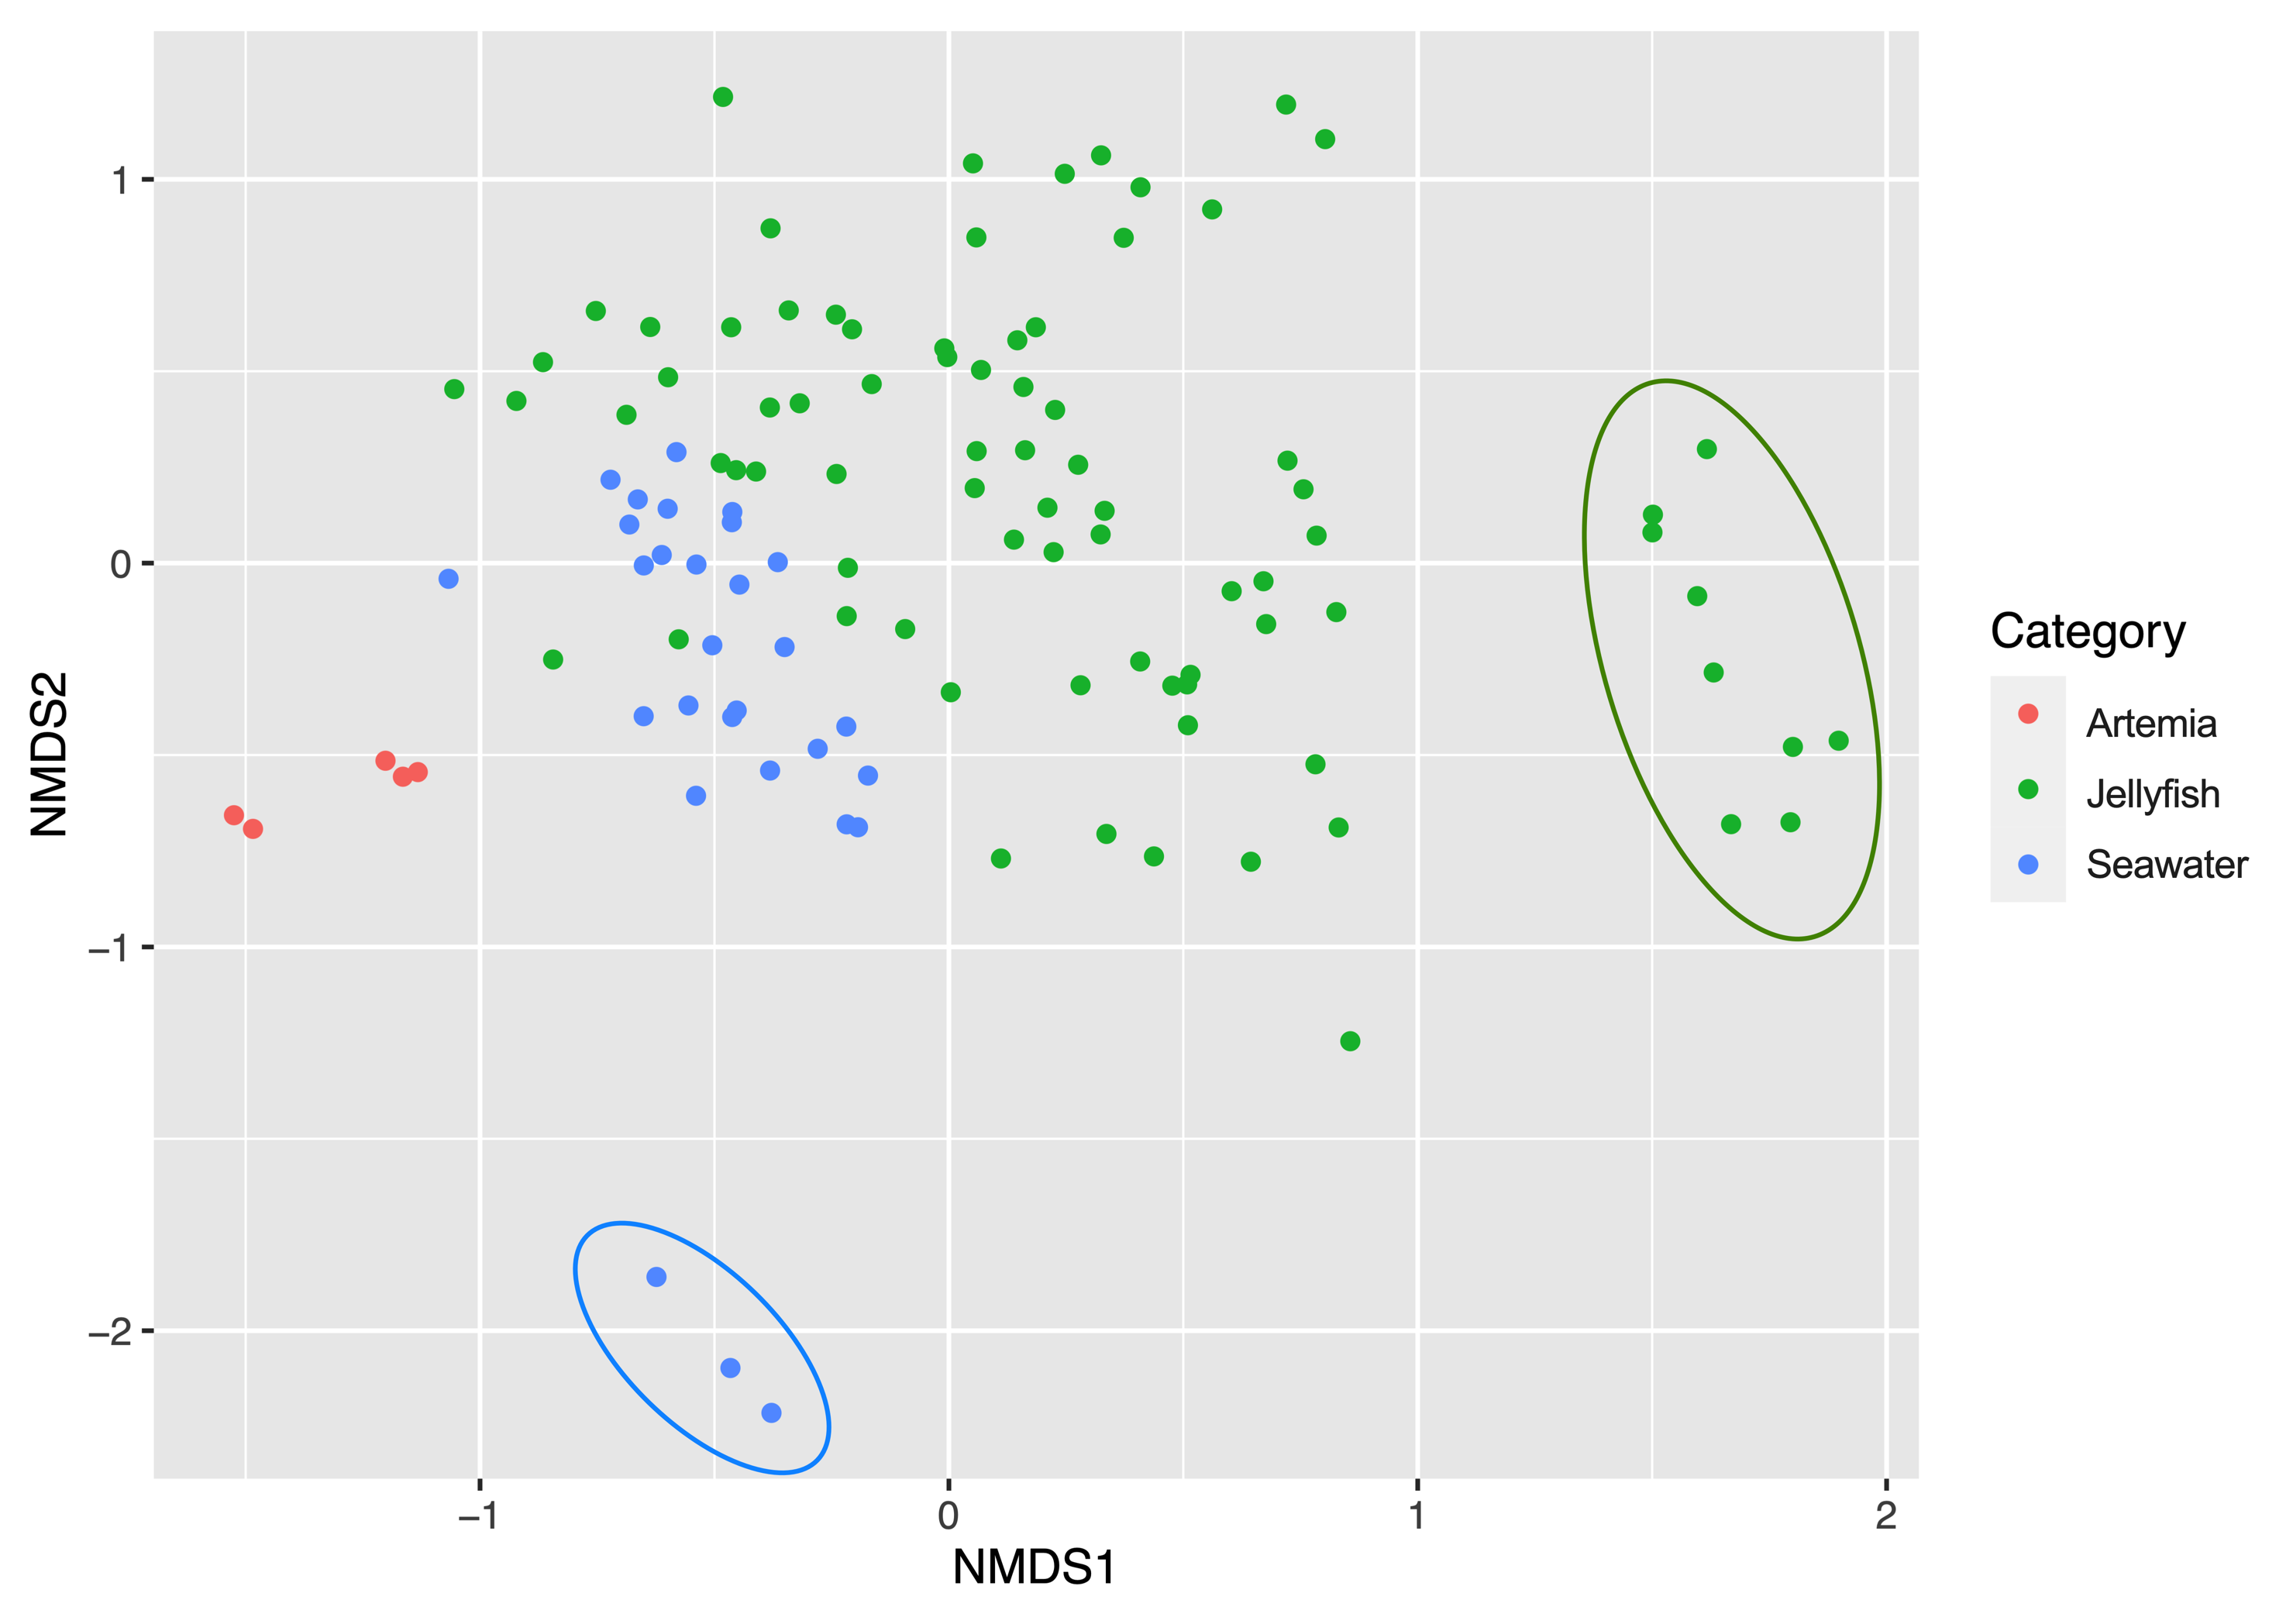


**Figure S14.** Non-metric multidimensional scaling (NMDS) reveals the distribution of *Artemia* food, *Cassiopea* jellyfish (both natural and used in the aquaria) and seawater (both natural and used in the aquaria) in the ordination space. Circles indicate the samples collected from the site before the exposure to any treatment (*i.e.*, environmental origin).


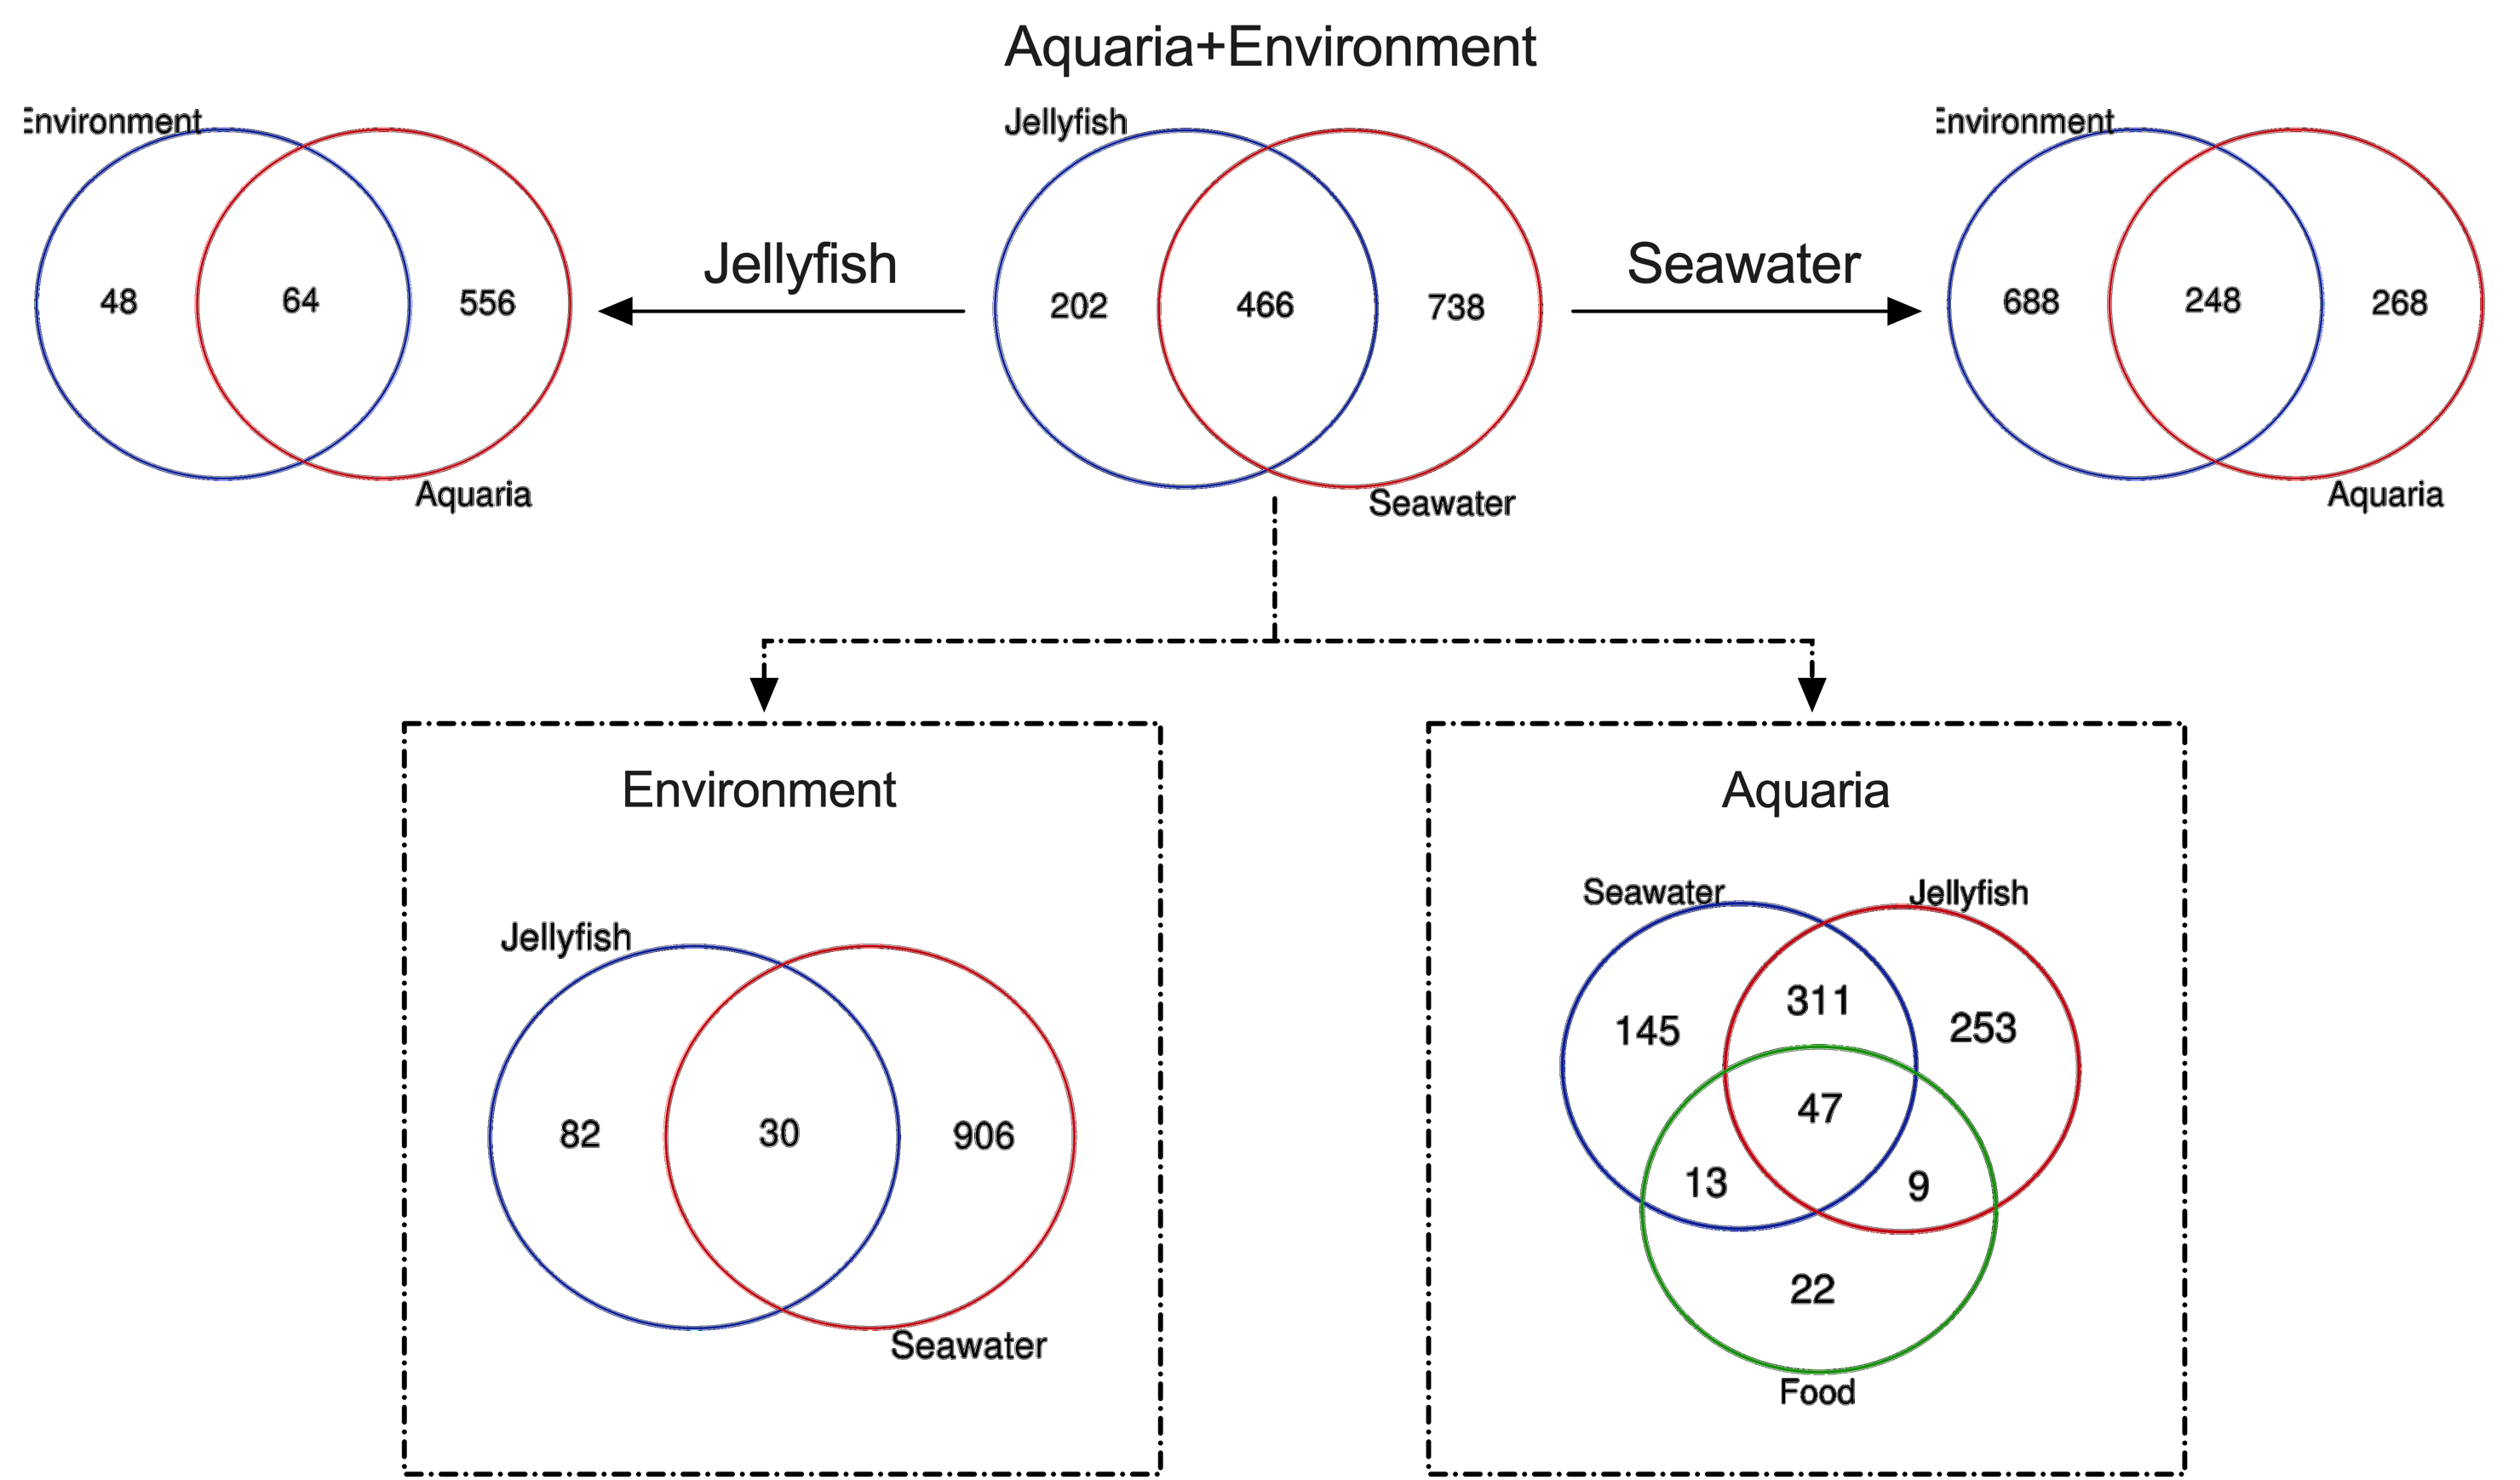


**Figure S15.** The centralVenn diagram shows the number of OTUs shared among seawater (both in the environment and used in the aquaria) and jellyfish (both in the environment and used in the aquaria). Additional Venn diagrams showed the number of OTUs shared among environmental and aquaria samples for jellyfish (left) and seawater (right), and for these two components in the environment (the second line, left) and aquaria (the second line, right). For the aquaria, the Artemia used to feed the jellyfish was also added as an additional source of bacteria.

**Figure S16.** Temperature decay patterns of jellyfish bacterial communities in “100% air saturation” (green) and “Nighttime supersaturation” (blue) conditions show the relationships between differences in temperature and the BC similarity; the relationship is tested by linear regression (R2) with a significance probability estimate (*p*-value).


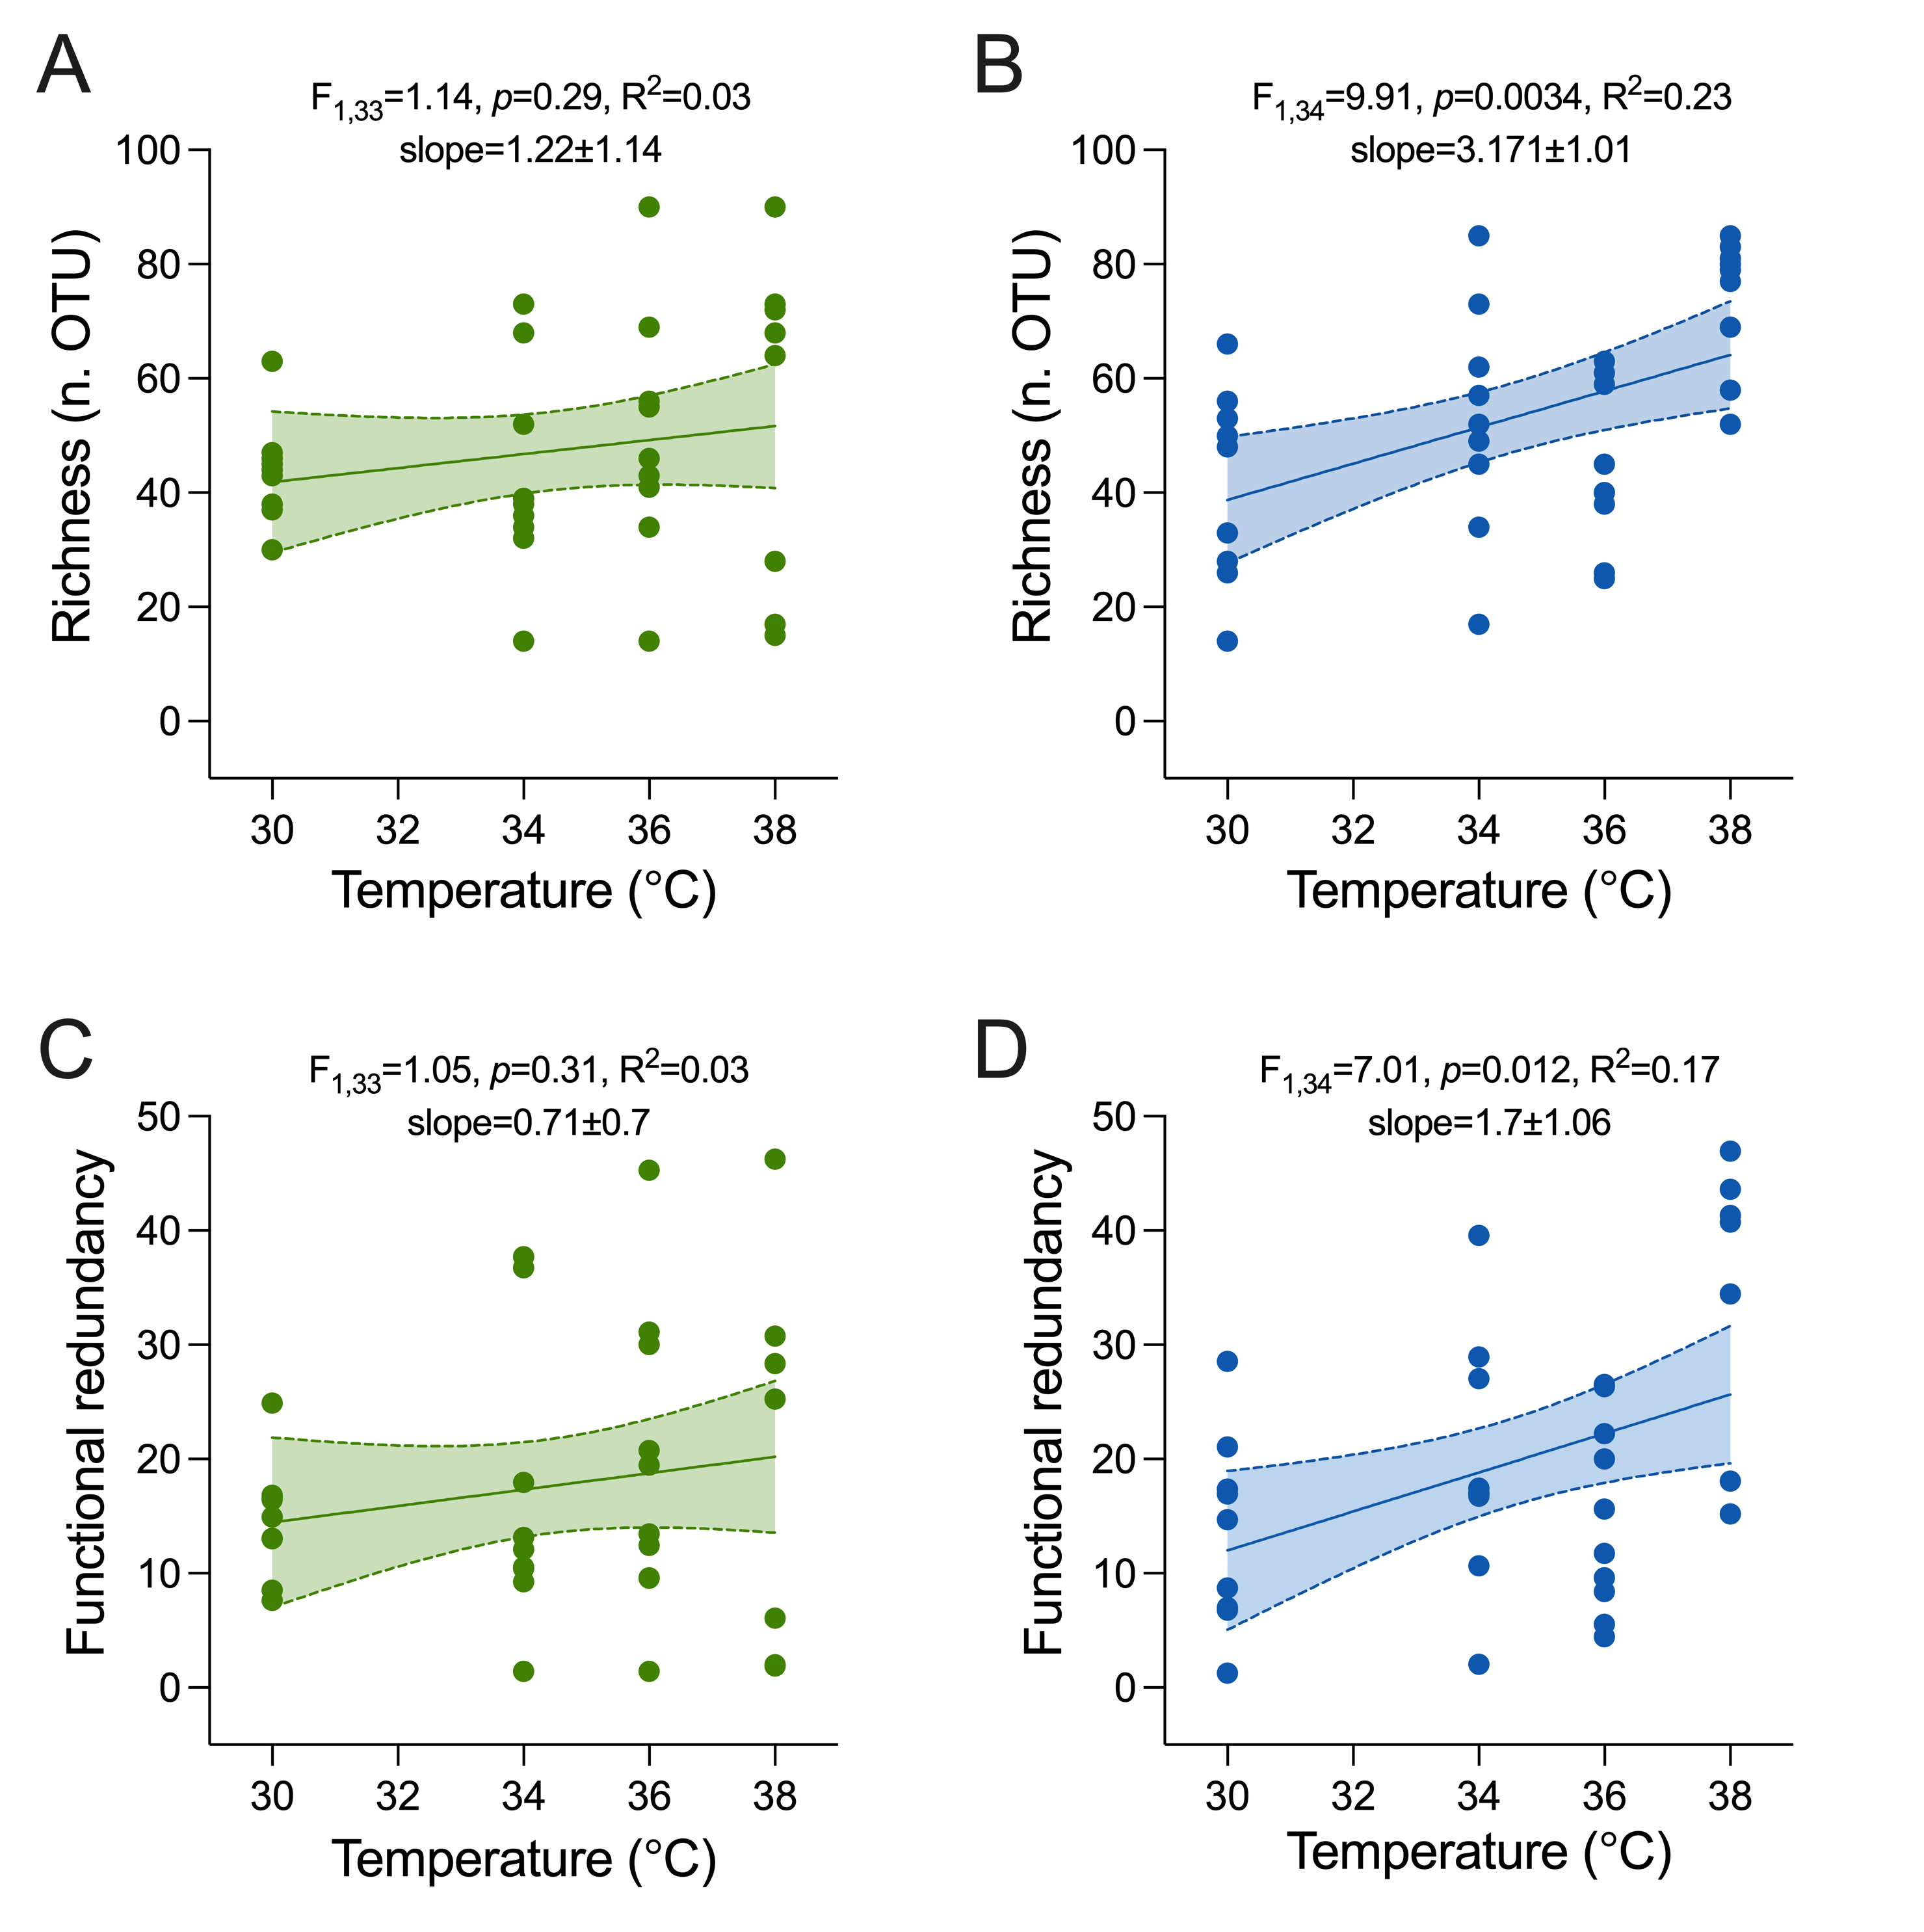


**Figure S17.** (**A** and **B**) The relationship between richness (expressed as the number of OTUs) of jellyfish bacterial communities and temperature in “100% air saturation” (green) and “Nighttime supersaturation” (blue) conditions, respectively (**C** and **D**) The relationship between functional redundancy (Tax4Fun) of jellyfish bacterial communities and temperature in “100% air saturation” (green) and “Nighttime supersaturation” (blue) conditions, respectively. The relationship is tested by linear regression (R2) with a significance probability estimate (*p*-value) and slope.

**Figure S18.** Correlation of bacterial taxa abundance with temperature changes (from 30°C to 38°C) in “100% air saturation” and “Nighttime supersaturation” treatments. Red colour indicates those bacterial taxa that have their relative abundance positively correlated with increasing temperature, while blues colour those that have their relative abundance negatively correlated with increasing temperature.

**Figure S19.** Predicted functions obtained by FaProTax. Predicted metabolisms are plotted and their abundance expressed as Log10-transformed values in “100% air saturation” and “Nighttime supersaturation” conditions along the different temperatures tested.
