# Supplementary material for: Oxygen supersaturation adds resistance to a cnidarian: Symbiodiniaceae holobiont under moderate warming in experimental settings
Source: Frontiers journal article supplement (doi:10.3389/fmars.2024.1305674), 2024-06-12
Supplement: Table_1.XLSX [file Table_1.XLSX]

## Sheet: Internal Oxygen 
Depth (µm)	Concentration (mg/l)	Oxygen treatment	Temperature (Celsius)
0	5.58967	100% air saturation	30
0	5.47092	100% air saturation	30
0	7.98933	100% air saturation	30
0	8.52317	nighttime supersaturation	30
0	8.5316	nighttime supersaturation	30
0	5.8882	nighttime supersaturation	30
0	7.98533	nighttime supersaturation	34
0	4.38486	nighttime supersaturation	34
0	7.95185	nighttime supersaturation	34
0	4.50531	100% air saturation	34
0	5.61433	100% air saturation	34
0	8.00323	100% air saturation	34
0	6.66622	100% air saturation	37
0	11.3364	100% air saturation	37
0	6.6222	100% air saturation	37
0	8.95761	nighttime supersaturation	37
0	5.93837	nighttime supersaturation	37
0	4.4807	nighttime supersaturation	37
50	5.4175	100% air saturation	30
50	5.21243	100% air saturation	30
50	8.0596	100% air saturation	30
50	8.48545	nighttime supersaturation	30
50	8.4352	nighttime supersaturation	30
50	5.89718	nighttime supersaturation	30
50	7.89255	nighttime supersaturation	34
50	4.21161	nighttime supersaturation	34
50	7.83531	nighttime supersaturation	34
50	4.46522	100% air saturation	34
50	5.42366	100% air saturation	34
50	8.11226	100% air saturation	34
50	6.55667	100% air saturation	37
50	11.0454	100% air saturation	37
50	6.67156	100% air saturation	37
50	6.377	nighttime supersaturation	37
50	5.75697	nighttime supersaturation	37
50	4.09836	nighttime supersaturation	37
100	5.29019	100% air saturation	30
100	4.53482	100% air saturation	30
100	8.04442	100% air saturation	30
100	8.53437	nighttime supersaturation	30
100	8.35793	nighttime supersaturation	30
100	6.0249	nighttime supersaturation	30
100	7.73933	nighttime supersaturation	34
100	4.09682	nighttime supersaturation	34
100	7.81386	nighttime supersaturation	34
100	4.43724	100% air saturation	34
100	5.24861	100% air saturation	34
100	7.92208	100% air saturation	34
100	6.47711	100% air saturation	37
100	10.7751	100% air saturation	37
100	6.59368	100% air saturation	37
100	5.59461	nighttime supersaturation	37
100	5.5876	nighttime supersaturation	37
100	3.78351	nighttime supersaturation	37
150	5.20801	100% air saturation	30
150	3.64604	100% air saturation	30
150	8.09379	100% air saturation	30
150	8.51624	nighttime supersaturation	30
150	8.04689	nighttime supersaturation	30
150	6.00229	nighttime supersaturation	30
150	7.59394	nighttime supersaturation	34
150	3.98473	nighttime supersaturation	34
150	7.77476	nighttime supersaturation	34
150	4.41639	100% air saturation	34
150	5.08037	100% air saturation	34
150	8.20267	100% air saturation	34
150	6.40712	100% air saturation	37
150	10.5559	100% air saturation	37
150	6.43769	100% air saturation	37
150	5.12604	nighttime supersaturation	37
150	5.42165	nighttime supersaturation	37
150	3.51561	nighttime supersaturation	37
200	5.11372	100% air saturation	30
200	3.73254	100% air saturation	30
200	8.0048	100% air saturation	30
200	8.58656	nighttime supersaturation	30
200	7.5726	nighttime supersaturation	30
200	5.91077	nighttime supersaturation	30
200	7.50082	nighttime supersaturation	34
200	3.85635	nighttime supersaturation	34
200	7.72344	nighttime supersaturation	34
200	4.39578	100% air saturation	34
200	4.95321	100% air saturation	34
200	8.15455	100% air saturation	34
200	6.34223	100% air saturation	37
200	10.4577	100% air saturation	37
200	6.26096	100% air saturation	37
200	4.79667	nighttime supersaturation	37
200	5.24459	nighttime supersaturation	37
200	3.28078	nighttime supersaturation	37
250	4.99287	100% air saturation	30
250	3.82536	100% air saturation	30
250	8.04691	100% air saturation	30
250	7.14348	nighttime supersaturation	30
250	7.35134	nighttime supersaturation	30
250	5.69059	nighttime supersaturation	30
250	7.38474	nighttime supersaturation	34
250	3.72689	nighttime supersaturation	34
250	7.96159	nighttime supersaturation	34
250	4.37439	100% air saturation	34
250	4.83055	100% air saturation	34
250	8.05427	100% air saturation	34
250	6.27184	100% air saturation	37
250	10.3119	100% air saturation	37
250	6.27435	100% air saturation	37
250	4.5413	nighttime supersaturation	37
250	5.08809	nighttime supersaturation	37
250	3.07177	nighttime supersaturation	37
300	4.82334	100% air saturation	30
300	3.97451	100% air saturation	30
300	7.55377	100% air saturation	30
300	6.58336	nighttime supersaturation	30
300	7.28776	nighttime supersaturation	30
300	5.45428	nighttime supersaturation	30
300	7.28998	nighttime supersaturation	34
300	3.59868	nighttime supersaturation	34
300	8.05986	nighttime supersaturation	34
300	4.36273	100% air saturation	34
300	4.67849	100% air saturation	34
300	8.08481	100% air saturation	34
300	6.22344	100% air saturation	37
300	10.1279	100% air saturation	37
300	6.45005	100% air saturation	37
300	4.29358	nighttime supersaturation	37
300	4.91404	nighttime supersaturation	37
300	2.89029	nighttime supersaturation	37
350	4.75994	100% air saturation	30
350	3.97323	100% air saturation	30
350	7.52886	100% air saturation	30
350	6.05888	nighttime supersaturation	30
350	7.53712	nighttime supersaturation	30
350	5.1444	nighttime supersaturation	30
350	7.14454	nighttime supersaturation	34
350	3.46731	nighttime supersaturation	34
350	7.94832	nighttime supersaturation	34
350	4.34719	100% air saturation	34
350	4.57877	100% air saturation	34
350	8.08719	100% air saturation	34
350	6.18489	100% air saturation	37
350	10.2059	100% air saturation	37
350	6.56268	100% air saturation	37
350	3.97098	nighttime supersaturation	37
350	4.74958	nighttime supersaturation	37
350	2.75852	nighttime supersaturation	37
400	4.64234	100% air saturation	30
400	4.01015	100% air saturation	30
400	7.39488	100% air saturation	30
400	5.92671	nighttime supersaturation	30
400	7.3137	nighttime supersaturation	30
400	4.89023	nighttime supersaturation	30
400	7.03061	nighttime supersaturation	34
400	3.34427	nighttime supersaturation	34
400	7.93507	nighttime supersaturation	34
400	4.33692	100% air saturation	34
400	4.48829	100% air saturation	34
400	8.11294	100% air saturation	34
400	6.11224	100% air saturation	37
400	10.0616	100% air saturation	37
400	6.52841	100% air saturation	37
400	3.6435	nighttime supersaturation	37
400	4.56959	nighttime supersaturation	37
400	2.60299	nighttime supersaturation	37
450	4.56582	100% air saturation	30
450	4.046	100% air saturation	30
450	7.31926	100% air saturation	30
450	5.69227	nighttime supersaturation	30
450	7.33507	nighttime supersaturation	30
450	4.67572	nighttime supersaturation	30
450	6.90976	nighttime supersaturation	34
450	3.22765	nighttime supersaturation	34
450	7.90479	nighttime supersaturation	34
450	4.32581	100% air saturation	34
450	4.44319	100% air saturation	34
450	8.17417	100% air saturation	34
450	6.03353	100% air saturation	37
450	9.90975	100% air saturation	37
450	6.51753	100% air saturation	37
450	3.30353	nighttime supersaturation	37
450	4.44442	nighttime supersaturation	37
450	2.46098	nighttime supersaturation	37
500	4.52515	100% air saturation	30
500	3.41041	100% air saturation	30
500	7.20287	100% air saturation	30
500	5.53385	nighttime supersaturation	30
500	7.33119	nighttime supersaturation	30
500	4.52689	nighttime supersaturation	30
500	6.76034	nighttime supersaturation	34
500	3.08743	nighttime supersaturation	34
500	8.08093	nighttime supersaturation	34
500	4.31699	100% air saturation	34
500	4.38698	100% air saturation	34
500	8.0914	100% air saturation	34
500	5.97137	100% air saturation	37
500	9.77676	100% air saturation	37
500	6.5115	100% air saturation	37
500	2.91893	nighttime supersaturation	37
500	4.32574	nighttime supersaturation	37
500	2.32502	nighttime supersaturation	37
550	4.46557	100% air saturation	30
550	4.55312	100% air saturation	30
550	7.18208	100% air saturation	30
550	5.57993	nighttime supersaturation	30
550	7.11668	nighttime supersaturation	30
550	4.38556	nighttime supersaturation	30
550	6.57517	nighttime supersaturation	34
550	2.9473	nighttime supersaturation	34
550	7.95162	nighttime supersaturation	34
550	4.30987	100% air saturation	34
550	4.3021	100% air saturation	34
550	8.11994	100% air saturation	34
550	5.93483	100% air saturation	37
550	9.66339	100% air saturation	37
550	6.47954	100% air saturation	37
550	2.63677	nighttime supersaturation	37
550	4.22612	nighttime supersaturation	37
550	2.20506	nighttime supersaturation	37
600	4.37963	100% air saturation	30
600	3.00724	100% air saturation	30
600	7.24863	100% air saturation	30
600	5.65038	nighttime supersaturation	30
600	6.60424	nighttime supersaturation	30
600	4.26565	nighttime supersaturation	30
600	6.2704	nighttime supersaturation	34
600	2.82037	nighttime supersaturation	34
600	7.94917	nighttime supersaturation	34
600	4.29887	100% air saturation	34
600	4.22162	100% air saturation	34
600	8.16754	100% air saturation	34
600	5.86832	100% air saturation	37
600	9.53858	100% air saturation	37
600	6.42617	100% air saturation	37
600	2.38453	nighttime supersaturation	37
600	4.13398	nighttime supersaturation	37
600	2.08343	nighttime supersaturation	37
650	4.33853	100% air saturation	30
650	2.40481	100% air saturation	30
650	7.29132	100% air saturation	30
650	5.62923	nighttime supersaturation	30
650	6.55623	nighttime supersaturation	30
650	4.26338	nighttime supersaturation	30
650	5.77222	nighttime supersaturation	34
650	2.69008	nighttime supersaturation	34
650	7.88086	nighttime supersaturation	34
650	4.2921	100% air saturation	34
650	4.13731	100% air saturation	34
650	8.08046	100% air saturation	34
650	5.80315	100% air saturation	37
650	9.43986	100% air saturation	37
650	6.40318	100% air saturation	37
650	2.15049	nighttime supersaturation	37
650	4.04389	nighttime supersaturation	37
650	1.95026	nighttime supersaturation	37
700	4.29743	100% air saturation	30
700	2.01427	100% air saturation	30
700	7.32613	100% air saturation	30
700	5.40497	nighttime supersaturation	30
700	6.8543	nighttime supersaturation	30
700	4.26912	nighttime supersaturation	30
700	5.46863	nighttime supersaturation	34
700	2.56035	nighttime supersaturation	34
700	8.05238	nighttime supersaturation	34
700	4.28307	100% air saturation	34
700	4.04473	100% air saturation	34
700	7.96595	100% air saturation	34
700	5.76992	100% air saturation	37
700	9.36887	100% air saturation	37
700	6.29023	100% air saturation	37
700	1.94963	nighttime supersaturation	37
700	3.94734	nighttime supersaturation	37
700	1.83659	nighttime supersaturation	37
750	4.20908	100% air saturation	30
750	1.74861	100% air saturation	30
750	7.27165	100% air saturation	30
750	5.17731	nighttime supersaturation	30
750	6.96771	nighttime supersaturation	30
750	4.20337	nighttime supersaturation	30
750	5.49097	nighttime supersaturation	34
750	2.42554	nighttime supersaturation	34
750	8.0789	nighttime supersaturation	34
750	4.2753	100% air saturation	34
750	3.95665	100% air saturation	34
750	7.68921	100% air saturation	34
750	5.75518	100% air saturation	37
750	9.31989	100% air saturation	37
750	6.34448	100% air saturation	37
750	1.80689	nighttime supersaturation	37
750	3.88885	nighttime supersaturation	37
750	1.71821	nighttime supersaturation	37
800	4.14317	100% air saturation	30
800	1.39677	100% air saturation	30
800	7.2094	100% air saturation	30
800	5.05888	nighttime supersaturation	30
800	6.83564	nighttime supersaturation	30
800	4.11765	nighttime supersaturation	30
800	5.51168	nighttime supersaturation	34
800	2.29234	nighttime supersaturation	34
800	7.99305	nighttime supersaturation	34
800	4.26392	100% air saturation	34
800	3.8673	100% air saturation	34
800	7.1475	100% air saturation	34
800	5.73321	100% air saturation	37
800	9.27543	100% air saturation	37
800	6.34243	100% air saturation	37
800	1.69468	nighttime supersaturation	37
800	3.80766	nighttime supersaturation	37
800	1.62741	nighttime supersaturation	37
850	4.0981	100% air saturation	30
850	1.07766	100% air saturation	30
850	7.08791	100% air saturation	30
850	4.96581	nighttime supersaturation	30
850	6.75979	nighttime supersaturation	30
850	4.02152	nighttime supersaturation	30
850	5.4828	nighttime supersaturation	34
850	2.15469	nighttime supersaturation	34
850	8.03237	nighttime supersaturation	34
850	4.25592	100% air saturation	34
850	3.79504	100% air saturation	34
850	6.49253	100% air saturation	34
850	5.67884	100% air saturation	37
850	9.33577	100% air saturation	37
850	6.28762	100% air saturation	37
850	1.58396	nighttime supersaturation	37
850	3.76581	nighttime supersaturation	37
850	1.53468	nighttime supersaturation	37
900	4.07248	100% air saturation	30
900	0.996512	100% air saturation	30
900	6.9198	100% air saturation	30
900	4.8833	nighttime supersaturation	30
900	6.7095	nighttime supersaturation	30
900	3.84349	nighttime supersaturation	30
900	5.41322	nighttime supersaturation	34
900	2.02892	nighttime supersaturation	34
900	8.01955	nighttime supersaturation	34
900	4.24904	100% air saturation	34
900	3.70252	100% air saturation	34
900	6.4369	100% air saturation	34
900	5.61754	100% air saturation	37
900	9.36796	100% air saturation	37
900	6.15124	100% air saturation	37
900	1.49393	nighttime supersaturation	37
900	3.69253	nighttime supersaturation	37
900	1.43374	nighttime supersaturation	37
950	4.02364	100% air saturation	30
950	1.14784	100% air saturation	30
950	6.81431	100% air saturation	30
950	4.84954	nighttime supersaturation	30
950	6.74022	nighttime supersaturation	30
950	3.69338	nighttime supersaturation	30
950	5.43974	nighttime supersaturation	34
950	1.89377	nighttime supersaturation	34
950	8.09973	nighttime supersaturation	34
950	4.2378	100% air saturation	34
950	3.60392	100% air saturation	34
950	6.7497	100% air saturation	34
950	5.53229	100% air saturation	37
950	9.28408	100% air saturation	37
950	6.06156	100% air saturation	37
950	1.39741	nighttime supersaturation	37
950	3.62062	nighttime supersaturation	37
950	1.35597	nighttime supersaturation	37
1000	4.0002	100% air saturation	30
1000	1.25096	100% air saturation	30
1000	6.68904	100% air saturation	30
1000	4.81116	nighttime supersaturation	30
1000	7.13628	nighttime supersaturation	30
1000	3.62847	nighttime supersaturation	30
1000	5.49951	nighttime supersaturation	34
1000	1.76235	nighttime supersaturation	34
1000	8.07274	nighttime supersaturation	34
1000	4.22846	100% air saturation	34
1000	3.50348	100% air saturation	34
1000	5.75904	100% air saturation	34
1000	5.47347	100% air saturation	37
1000	9.14668	100% air saturation	37
1000	5.99786	100% air saturation	37
1000	1.31929	nighttime supersaturation	37
1000	3.56482	nighttime supersaturation	37
1000	1.30583	nighttime supersaturation	37
1050	3.98023	100% air saturation	30
1050	0.856939	100% air saturation	30
1050	6.47889	100% air saturation	30
1050	4.73782	nighttime supersaturation	30
1050	7.13127	nighttime supersaturation	30
1050	3.709	nighttime supersaturation	30
1050	5.5179	nighttime supersaturation	34
1050	1.64619	nighttime supersaturation	34
1050	8.07413	nighttime supersaturation	34
1050	4.21562	100% air saturation	34
1050	3.42652	100% air saturation	34
1050	4.89852	100% air saturation	34
1050	5.41151	100% air saturation	37
1050	8.99246	100% air saturation	37
1050	5.94945	100% air saturation	37
1050	1.23739	nighttime supersaturation	37
1050	3.51181	nighttime supersaturation	37
1050	1.26811	nighttime supersaturation	37
1100	3.96133	100% air saturation	30
1100	0.73775	100% air saturation	30
1100	6.21898	100% air saturation	30
1100	4.66842	nighttime supersaturation	30
1100	6.95859	nighttime supersaturation	30
1100	3.82999	nighttime supersaturation	30
1100	5.57784	nighttime supersaturation	34
1100	1.52745	nighttime supersaturation	34
1100	8.08952	nighttime supersaturation	34
1100	4.20945	100% air saturation	34
1100	3.35566	100% air saturation	34
1100	4.29411	100% air saturation	34
1100	5.33269	100% air saturation	37
1100	8.83393	100% air saturation	37
1100	5.87347	100% air saturation	37
1100	1.16914	nighttime supersaturation	37
1100	3.45439	nighttime supersaturation	37
1100	1.22439	nighttime supersaturation	37
1150	3.96153	100% air saturation	30
1150	0.750213	100% air saturation	30
1150	5.83639	100% air saturation	30
1150	4.59236	nighttime supersaturation	30
1150	6.70158	nighttime supersaturation	30
1150	3.92073	nighttime supersaturation	30
1150	5.61598	nighttime supersaturation	34
1150	1.41397	nighttime supersaturation	34
1150	8.15322	nighttime supersaturation	34
1150	4.20132	100% air saturation	34
1150	3.29179	100% air saturation	34
1150	4.22274	100% air saturation	34
1150	5.27355	100% air saturation	37
1150	8.69135	100% air saturation	37
1150	5.81616	100% air saturation	37
1150	1.11677	nighttime supersaturation	37
1150	3.40362	nighttime supersaturation	37
1150	1.19004	nighttime supersaturation	37
1200	3.96516	100% air saturation	30
1200	0.755558	100% air saturation	30
1200	5.41162	100% air saturation	30
1200	4.53146	nighttime supersaturation	30
1200	6.61421	nighttime supersaturation	30
1200	4.01407	nighttime supersaturation	30
1200	5.637	nighttime supersaturation	34
1200	1.31509	nighttime supersaturation	34
1200	8.10462	nighttime supersaturation	34
1200	4.20298	100% air saturation	34
1200	3.21671	100% air saturation	34
1200	4.01107	100% air saturation	34
1200	5.20579	100% air saturation	37
1200	8.56369	100% air saturation	37
1200	5.78032	100% air saturation	37
1200	1.07486	nighttime supersaturation	37
1200	3.34445	nighttime supersaturation	37
1200	1.15789	nighttime supersaturation	37
1250	3.96303	100% air saturation	30
1250	0.727897	100% air saturation	30
1250	5.01377	100% air saturation	30
1250	4.47531	nighttime supersaturation	30
1250	6.40932	nighttime supersaturation	30
1250	4.07962	nighttime supersaturation	30
1250	5.64687	nighttime supersaturation	34
1250	1.21086	nighttime supersaturation	34
1250	8.02519	nighttime supersaturation	34
1250	4.19898	100% air saturation	34
1250	3.14659	100% air saturation	34
1250	3.72331	100% air saturation	34
1250	5.11296	100% air saturation	37
1250	8.4401	100% air saturation	37
1250	5.74341	100% air saturation	37
1250	1.03557	nighttime supersaturation	37
1250	3.28321	nighttime supersaturation	37
1250	1.13164	nighttime supersaturation	37
1300	3.96272	100% air saturation	30
1300	0.624037	100% air saturation	30
1300	4.65132	100% air saturation	30
1300	4.39494	nighttime supersaturation	30
1300	6.20166	nighttime supersaturation	30
1300	4.14027	nighttime supersaturation	30
1300	5.64449	nighttime supersaturation	34
1300	1.11642	nighttime supersaturation	34
1300	7.29034	nighttime supersaturation	34
1300	4.18781	100% air saturation	34
1300	3.09224	100% air saturation	34
1300	3.4545	100% air saturation	34
1300	5.01789	100% air saturation	37
1300	8.3246	100% air saturation	37
1300	5.72074	100% air saturation	37
1300	1.01652	nighttime supersaturation	37
1300	3.23405	nighttime supersaturation	37
1300	1.11337	nighttime supersaturation	37
1350	3.9694	100% air saturation	30
1350	0.726297	100% air saturation	30
1350	3.93606	100% air saturation	30
1350	4.34493	nighttime supersaturation	30
1350	6.0512	nighttime supersaturation	30
1350	4.02319	nighttime supersaturation	30
1350	5.62432	nighttime supersaturation	34
1350	1.02656	nighttime supersaturation	34
1350	6.9397	nighttime supersaturation	34
1350	4.18327	100% air saturation	34
1350	3.04565	100% air saturation	34
1350	3.22386	100% air saturation	34
1350	4.87493	100% air saturation	37
1350	8.22584	100% air saturation	37
1350	5.69826	100% air saturation	37
1350	1.0023	nighttime supersaturation	37
1350	3.18539	nighttime supersaturation	37
1350	1.08958	nighttime supersaturation	37
1400	4.0212	100% air saturation	30
1400	0.708422	100% air saturation	30
1400	3.68362	100% air saturation	30
1400	4.2847	nighttime supersaturation	30
1400	6.12967	nighttime supersaturation	30
1400	3.81531	nighttime supersaturation	30
1400	5.60049	nighttime supersaturation	34
1400	0.940003	nighttime supersaturation	34
1400	6.62977	nighttime supersaturation	34
1400	4.17865	100% air saturation	34
1400	2.97516	100% air saturation	34
1400	2.98776	100% air saturation	34
1400	4.77317	100% air saturation	37
1400	8.12865	100% air saturation	37
1400	5.67247	100% air saturation	37
1400	0.993962	nighttime supersaturation	37
1400	3.13733	nighttime supersaturation	37
1400	1.06391	nighttime supersaturation	37
1450	3.96222	100% air saturation	30
1450	0.602761	100% air saturation	30
1450	3.86334	100% air saturation	30
1450	4.22187	nighttime supersaturation	30
1450	6.24078	nighttime supersaturation	30
1450	3.76357	nighttime supersaturation	30
1450	5.5883	nighttime supersaturation	34
1450	0.861599	nighttime supersaturation	34
1450	6.34585	nighttime supersaturation	34
1450	4.17675	100% air saturation	34
1450	2.89495	100% air saturation	34
1450	2.75771	100% air saturation	34
1450	4.6588	100% air saturation	37
1450	8.04383	100% air saturation	37
1450	5.62705	100% air saturation	37
1450	0.988709	nighttime supersaturation	37
1450	3.0775	nighttime supersaturation	37
1450	1.03803	nighttime supersaturation	37
1500	3.86012	100% air saturation	30
1500	0.567469	100% air saturation	30
1500	3.78591	100% air saturation	30
1500	4.17999	nighttime supersaturation	30
1500	6.13052	nighttime supersaturation	30
1500	3.6555	nighttime supersaturation	30
1500	5.55948	nighttime supersaturation	34
1500	0.783232	nighttime supersaturation	34
1500	6.0423	nighttime supersaturation	34
1500	4.16892	100% air saturation	34
1500	2.80607	100% air saturation	34
1500	2.537	100% air saturation	34
1500	4.56088	100% air saturation	37
1500	7.94948	100% air saturation	37
1500	5.60762	100% air saturation	37
1500	0.984482	nighttime supersaturation	37
1500	3.04312	nighttime supersaturation	37
1500	1.02406	nighttime supersaturation	37
1550	3.95344	100% air saturation	30
1550	0.561387	100% air saturation	30
1550	3.84631	100% air saturation	30
1550	4.14897	nighttime supersaturation	30
1550	6.14249	nighttime supersaturation	30
1550	3.59753	nighttime supersaturation	30
1550	5.52947	nighttime supersaturation	34
1550	0.704041	nighttime supersaturation	34
1550	5.74466	nighttime supersaturation	34
1550	4.16331	100% air saturation	34
1550	2.74512	100% air saturation	34
1550	2.31328	100% air saturation	34
1550	4.47209	100% air saturation	37
1550	7.91311	100% air saturation	37
1550	5.5665	100% air saturation	37
1550	0.97489	nighttime supersaturation	37
1550	3.01624	nighttime supersaturation	37
1550	1.00905	nighttime supersaturation	37
1600	3.99476	100% air saturation	30
1600	0.777744	100% air saturation	30
1600	3.8226	100% air saturation	30
1600	4.11438	nighttime supersaturation	30
1600	6.07782	nighttime supersaturation	30
1600	3.47405	nighttime supersaturation	30
1600	5.49231	nighttime supersaturation	34
1600	0.637297	nighttime supersaturation	34
1600	5.49973	nighttime supersaturation	34
1600	4.16375	100% air saturation	34
1600	2.701	100% air saturation	34
1600	2.058	100% air saturation	34
1600	4.38046	100% air saturation	37
1600	7.85391	100% air saturation	37
1600	5.56997	100% air saturation	37
1600	0.962386	nighttime supersaturation	37
1600	2.97829	nighttime supersaturation	37
1600	0.995825	nighttime supersaturation	37
1650	3.99652	100% air saturation	30
1650	0.764852	100% air saturation	30
1650	3.77698	100% air saturation	30
1650	4.07533	nighttime supersaturation	30
1650	6.00262	nighttime supersaturation	30
1650	3.35408	nighttime supersaturation	30
1650	5.48858	nighttime supersaturation	34
1650	0.565091	nighttime supersaturation	34
1650	5.28469	nighttime supersaturation	34
1650	4.15948	100% air saturation	34
1650	2.65465	100% air saturation	34
1650	1.87204	100% air saturation	34
1650	4.29108	100% air saturation	37
1650	7.77228	100% air saturation	37
1650	6.14856	100% air saturation	37
1650	0.94058	nighttime supersaturation	37
1650	2.92254	nighttime supersaturation	37
1650	0.985913	nighttime supersaturation	37
1700	3.98681	100% air saturation	30
1700	0.754927	100% air saturation	30
1700	3.64925	100% air saturation	30
1700	4.00579	nighttime supersaturation	30
1700	5.80707	nighttime supersaturation	30
1700	3.34044	nighttime supersaturation	30
1700	5.46316	nighttime supersaturation	34
1700	0.511293	nighttime supersaturation	34
1700	5.06971	nighttime supersaturation	34
1700	4.1549	100% air saturation	34
1700	2.62037	100% air saturation	34
1700	1.76402	100% air saturation	34
1700	4.19371	100% air saturation	37
1700	7.70265	100% air saturation	37
1700	6.44937	100% air saturation	37
1700	0.921471	nighttime supersaturation	37
1700	2.87416	nighttime supersaturation	37
1700	0.980574	nighttime supersaturation	37
1750	3.9781	100% air saturation	30
1750	0.724887	100% air saturation	30
1750	3.41268	100% air saturation	30
1750	3.9553	nighttime supersaturation	30
1750	5.58035	nighttime supersaturation	30
1750	3.3706	nighttime supersaturation	30
1750	5.44259	nighttime supersaturation	34
1750	0.469001	nighttime supersaturation	34
1750	4.84163	nighttime supersaturation	34
1750	4.1532	100% air saturation	34
1750	2.58981	100% air saturation	34
1750	1.63999	100% air saturation	34
1750	4.10003	100% air saturation	37
1750	7.63328	100% air saturation	37
1750	6.35845	100% air saturation	37
1750	0.912937	nighttime supersaturation	37
1750	2.86223	nighttime supersaturation	37
1750	0.975226	nighttime supersaturation	37
1800	3.97499	100% air saturation	30
1800	0.654564	100% air saturation	30
1800	3.13527	100% air saturation	30
1800	3.91468	nighttime supersaturation	30
1800	5.34376	nighttime supersaturation	30
1800	3.34131	nighttime supersaturation	30
1800	5.4132	nighttime supersaturation	34
1800	0.414048	nighttime supersaturation	34
1800	4.62781	nighttime supersaturation	34
1800	4.14694	100% air saturation	34
1800	2.54302	100% air saturation	34
1800	1.52166	100% air saturation	34
1800	4.00855	100% air saturation	37
1800	7.54645	100% air saturation	37
1800	6.14984	100% air saturation	37
1800	0.903183	nighttime supersaturation	37
1800	2.84239	nighttime supersaturation	37
1800	0.976334	nighttime supersaturation	37
1850	3.97528	100% air saturation	30
1850	0.633006	100% air saturation	30
1850	2.93226	100% air saturation	30
1850	3.86442	nighttime supersaturation	30
1850	5.38112	nighttime supersaturation	30
1850	3.40813	nighttime supersaturation	30
1850	5.3803	nighttime supersaturation	34
1850	0.377727	nighttime supersaturation	34
1850	4.38933	nighttime supersaturation	34
1850	4.14874	100% air saturation	34
1850	2.47555	100% air saturation	34
1850	1.41662	100% air saturation	34
1850	3.95069	100% air saturation	37
1850	7.49661	100% air saturation	37
1850	5.91032	100% air saturation	37
1850	0.903233	nighttime supersaturation	37
1850	2.80555	nighttime supersaturation	37
1850	0.974417	nighttime supersaturation	37
1900	3.97432	100% air saturation	30
1900	0.602256	100% air saturation	30
1900	2.63784	100% air saturation	30
1900	3.80567	nighttime supersaturation	30
1900	5.34069	nighttime supersaturation	30
1900	3.33534	nighttime supersaturation	30
1900	5.35771	nighttime supersaturation	34
1900	0.344923	nighttime supersaturation	34
1900	4.15247	nighttime supersaturation	34
1900	4.1554	100% air saturation	34
1900	2.42186	100% air saturation	34
1900	1.32576	100% air saturation	34
1900	3.89551	100% air saturation	37
1900	7.44193	100% air saturation	37
1900	5.77895	100% air saturation	37
1900	0.903826	nighttime supersaturation	37
1900	2.74078	nighttime supersaturation	37
1900	0.978906	nighttime supersaturation	37
1950	3.98199	100% air saturation	30
1950	0.383272	100% air saturation	30
1950	2.53803	100% air saturation	30
1950	3.76805	nighttime supersaturation	30
1950	5.32426	nighttime supersaturation	30
1950	1.67388	nighttime supersaturation	30
1950	5.33508	nighttime supersaturation	34
1950	0.314884	nighttime supersaturation	34
1950	3.93787	nighttime supersaturation	34
1950	4.15113	100% air saturation	34
1950	2.47118	100% air saturation	34
1950	1.23838	100% air saturation	34
1950	3.83201	100% air saturation	37
1950	7.38246	100% air saturation	37
1950	5.67781	100% air saturation	37
1950	0.906179	nighttime supersaturation	37
1950	2.68502	nighttime supersaturation	37
1950	0.976948	nighttime supersaturation	37
2000	3.99464	100% air saturation	30
2000	0.354197	100% air saturation	30
2000	2.43457	100% air saturation	30
2000	3.73059	nighttime supersaturation	30
2000	5.14112	nighttime supersaturation	30
2000	1.65853	nighttime supersaturation	30
2000	5.31127	nighttime supersaturation	34
2000	0.314884	nighttime supersaturation	34
2000	3.74521	nighttime supersaturation	34
2000	4.14937	100% air saturation	34
2000	2.56699	100% air saturation	34
2000	1.17547	100% air saturation	34
2000	3.85796	100% air saturation	37
2000	7.32692	100% air saturation	37
2000	5.53872	100% air saturation	37
2000	0.909211	nighttime supersaturation	37
2000	2.61865	nighttime supersaturation	37
2000	0.98086	nighttime supersaturation	37

## Sheet: BPR
Sample name	Tank	Pulsations	Temperature (Celsius)	Oxygen treatment
N1	Tank 4		30	100% air saturation
N2	Tank 2		30	100% air saturation
N3	Tank 1		30	100% air saturation
N4	Tank 3		30	100% air saturation
N5	Tank 4	10	30	100% air saturation
N6	Tank 2		30	100% air saturation
N7	Tank 1	11	30	100% air saturation
N8	Tank 3	14	30	100% air saturation
N9	Tank 4	16	30	100% air saturation
N10	Tank 2		30	100% air saturation
N11	Tank 1		30	100% air saturation
N12	Tank 3	9	30	100% air saturation
N13	Tank 4		30	100% air saturation
N14	Tank 2	9	30	100% air saturation
N15	Tank 1		30	100% air saturation
N16	Tank 3		30	100% air saturation
N17	Tank 4	10	30	100% air saturation
N18	Tank 2	8	30	100% air saturation
N19	Tank 1		30	100% air saturation
N20	Tank 3	7	30	100% air saturation
N21	Tank 4		30	100% air saturation
N22	Tank 2	8	30	100% air saturation
N23	Tank 1	8	30	100% air saturation
N24	Tank 3	10	30	100% air saturation
H1	Tank 1		30	nighttime supersaturation
H2	Tank 2	14	30	nighttime supersaturation
H3	Tank 4	13	30	nighttime supersaturation
H4	Tank 3		30	nighttime supersaturation
H5	Tank 1		30	nighttime supersaturation
H6	Tank 2	15	30	nighttime supersaturation
H7	Tank 4		30	nighttime supersaturation
H8	Tank 3	12	30	nighttime supersaturation
H9	Tank 1	8	30	nighttime supersaturation
H10	Tank 2		30	nighttime supersaturation
H11	Tank 4	6	30	nighttime supersaturation
H12	Tank 3	6	30	nighttime supersaturation
H13	Tank 1		30	nighttime supersaturation
H14	Tank 2		30	nighttime supersaturation
H15	Tank 4		30	nighttime supersaturation
H16	Tank 3	11	30	nighttime supersaturation
H17	Tank 1		30	nighttime supersaturation
H18	Tank 2		30	nighttime supersaturation
H19	Tank 4	9	30	nighttime supersaturation
H20	Tank 3		30	nighttime supersaturation
H21	Tank 1	13	30	nighttime supersaturation
H22	Tank 2		30	nighttime supersaturation
H23	Tank 4	5	30	nighttime supersaturation
H24	Tank 3	8	30	nighttime supersaturation
N1	Tank 4		31	100% air saturation
N2	Tank 2	12	31	100% air saturation
N3	Tank 1		31	100% air saturation
N4	Tank 3	7	31	100% air saturation
N5	Tank 4	7	31	100% air saturation
N6	Tank 2		31	100% air saturation
N7	Tank 1		31	100% air saturation
N8	Tank 3		31	100% air saturation
N9	Tank 4	18	31	100% air saturation
N10	Tank 2	11	31	100% air saturation
N11	Tank 1	22	31	100% air saturation
N12	Tank 3	7	31	100% air saturation
N13	Tank 4		31	100% air saturation
N14	Tank 2	9	31	100% air saturation
N15	Tank 1	13	31	100% air saturation
N16	Tank 3	9	31	100% air saturation
N17	Tank 4	8	31	100% air saturation
N18	Tank 2	23	31	100% air saturation
N19	Tank 1		31	100% air saturation
N20	Tank 3	7	31	100% air saturation
N21	Tank 4		31	100% air saturation
N22	Tank 2		31	100% air saturation
N23	Tank 1		31	100% air saturation
N24	Tank 3		31	100% air saturation
H1	Tank 1		31	nighttime supersaturation
H2	Tank 2	29	31	nighttime supersaturation
H3	Tank 4	15	31	nighttime supersaturation
H4	Tank 3		31	nighttime supersaturation
H5	Tank 1	17	31	nighttime supersaturation
H6	Tank 2	12	31	nighttime supersaturation
H7	Tank 4		31	nighttime supersaturation
H8	Tank 3		31	nighttime supersaturation
H9	Tank 1	8	31	nighttime supersaturation
H10	Tank 2	15	31	nighttime supersaturation
H11	Tank 4		31	nighttime supersaturation
H12	Tank 3		31	nighttime supersaturation
H13	Tank 1		31	nighttime supersaturation
H14	Tank 2		31	nighttime supersaturation
H15	Tank 4	9	31	nighttime supersaturation
H16	Tank 3	8	31	nighttime supersaturation
H17	Tank 1		31	nighttime supersaturation
H18	Tank 2	23	31	nighttime supersaturation
H19	Tank 4		31	nighttime supersaturation
H20	Tank 3		31	nighttime supersaturation
H21	Tank 1	44	31	nighttime supersaturation
H22	Tank 2	9	31	nighttime supersaturation
H23	Tank 4		31	nighttime supersaturation
H24	Tank 3	7	31	nighttime supersaturation
N1	Tank 4		32	100% air saturation
N2	Tank 2	7	32	100% air saturation
N3	Tank 1		32	100% air saturation
N4	Tank 3	6	32	100% air saturation
N5	Tank 4	8	32	100% air saturation
N6	Tank 2		32	100% air saturation
N7	Tank 1	19	32	100% air saturation
N8	Tank 3		32	100% air saturation
N9	Tank 4		32	100% air saturation
N10	Tank 2	11	32	100% air saturation
N11	Tank 1		32	100% air saturation
N12	Tank 3	7	32	100% air saturation
N13	Tank 4		32	100% air saturation
N14	Tank 2	9	32	100% air saturation
N15	Tank 1	9	32	100% air saturation
N16	Tank 3	12	32	100% air saturation
N17	Tank 4	6	32	100% air saturation
N18	Tank 2	10	32	100% air saturation
N19	Tank 1		32	100% air saturation
N20	Tank 3	15	32	100% air saturation
N21	Tank 4	13	32	100% air saturation
N22	Tank 2	9	32	100% air saturation
N23	Tank 1	11	32	100% air saturation
N24	Tank 3		32	100% air saturation
H1	Tank 1		32	nighttime supersaturation
H2	Tank 2	8	32	nighttime supersaturation
H3	Tank 4	10	32	nighttime supersaturation
H4	Tank 3		32	nighttime supersaturation
H5	Tank 1	15	32	nighttime supersaturation
H6	Tank 2		32	nighttime supersaturation
H7	Tank 4		32	nighttime supersaturation
H8	Tank 3		32	nighttime supersaturation
H9	Tank 1	5	32	nighttime supersaturation
H10	Tank 2	12	32	nighttime supersaturation
H11	Tank 4		32	nighttime supersaturation
H12	Tank 3	23	32	nighttime supersaturation
H13	Tank 1	10	32	nighttime supersaturation
H14	Tank 2		32	nighttime supersaturation
H15	Tank 4	14	32	nighttime supersaturation
H16	Tank 3	9	32	nighttime supersaturation
H17	Tank 1	16	32	nighttime supersaturation
H18	Tank 2	9	32	nighttime supersaturation
H19	Tank 4	8	32	nighttime supersaturation
H20	Tank 3		32	nighttime supersaturation
H21	Tank 1		32	nighttime supersaturation
H22	Tank 2		32	nighttime supersaturation
H23	Tank 4	8	32	nighttime supersaturation
H24	Tank 3	14	32	nighttime supersaturation
N1	Tank 4		33	100% air saturation
N2	Tank 2	17	33	100% air saturation
N3	Tank 1		33	100% air saturation
N4	Tank 3	8	33	100% air saturation
N5	Tank 4	8	33	100% air saturation
N6	Tank 2		33	100% air saturation
N7	Tank 1	7	33	100% air saturation
N8	Tank 3		33	100% air saturation
N9	Tank 4	20	33	100% air saturation
N10	Tank 2	9	33	100% air saturation
N11	Tank 1		33	100% air saturation
N12	Tank 3	9	33	100% air saturation
N13	Tank 4	44	33	100% air saturation
N14	Tank 2	8	33	100% air saturation
N15	Tank 1	9	33	100% air saturation
N16	Tank 3	11	33	100% air saturation
N17	Tank 4	7	33	100% air saturation
N18	Tank 2		33	100% air saturation
N19	Tank 1		33	100% air saturation
N20	Tank 3		33	100% air saturation
N21	Tank 4	33	33	100% air saturation
N22	Tank 2		33	100% air saturation
N23	Tank 1	11	33	100% air saturation
N24	Tank 3		33	100% air saturation
H1	Tank 1		33	nighttime supersaturation
H2	Tank 2		33	nighttime supersaturation
H3	Tank 4	11	33	nighttime supersaturation
H4	Tank 3	9	33	nighttime supersaturation
H5	Tank 1	18	33	nighttime supersaturation
H6	Tank 2		33	nighttime supersaturation
H7	Tank 4		33	nighttime supersaturation
H8	Tank 3		33	nighttime supersaturation
H9	Tank 1	7	33	nighttime supersaturation
H10	Tank 2	12	33	nighttime supersaturation
H11	Tank 4		33	nighttime supersaturation
H12	Tank 3		33	nighttime supersaturation
H13	Tank 1		33	nighttime supersaturation
H14	Tank 2		33	nighttime supersaturation
H15	Tank 4	11	33	nighttime supersaturation
H16	Tank 3		33	nighttime supersaturation
H17	Tank 1	49	33	nighttime supersaturation
H18	Tank 2	8	33	nighttime supersaturation
H19	Tank 4	5	33	nighttime supersaturation
H20	Tank 3	15	33	nighttime supersaturation
H21	Tank 1		33	nighttime supersaturation
H22	Tank 2	16	33	nighttime supersaturation
H23	Tank 4		33	nighttime supersaturation
H24	Tank 3	13	33	nighttime supersaturation
N1	Tank 4		34	100% air saturation
N2	Tank 2	12	34	100% air saturation
N3	Tank 1		34	100% air saturation
N4	Tank 3		34	100% air saturation
N5	Tank 4	16	34	100% air saturation
N6	Tank 2		34	100% air saturation
N7	Tank 1	29	34	100% air saturation
N8	Tank 3	15	34	100% air saturation
N9	Tank 4		34	100% air saturation
N10	Tank 2		34	100% air saturation
N11	Tank 1	42	34	100% air saturation
N12	Tank 3	14	34	100% air saturation
N13	Tank 4		34	100% air saturation
N14	Tank 2	9	34	100% air saturation
N15	Tank 1	12	34	100% air saturation
N16	Tank 3		34	100% air saturation
N17	Tank 4	9	34	100% air saturation
N18	Tank 2	13	34	100% air saturation
N19	Tank 1		34	100% air saturation
N20	Tank 3	17	34	100% air saturation
N21	Tank 4	16	34	100% air saturation
N22	Tank 2	10	34	100% air saturation
N23	Tank 1		34	100% air saturation
N24	Tank 3		34	100% air saturation
H1	Tank 1		34	nighttime supersaturation
H2	Tank 2	14	34	nighttime supersaturation
H3	Tank 4	15	34	nighttime supersaturation
H4	Tank 3		34	nighttime supersaturation
H5	Tank 1		34	nighttime supersaturation
H6	Tank 2		34	nighttime supersaturation
H7	Tank 4		34	nighttime supersaturation
H8	Tank 3	18	34	nighttime supersaturation
H9	Tank 1	9	34	nighttime supersaturation
H10	Tank 2	8	34	nighttime supersaturation
H11	Tank 4	10	34	nighttime supersaturation
H12	Tank 3		34	nighttime supersaturation
H13	Tank 1		34	nighttime supersaturation
H14	Tank 2		34	nighttime supersaturation
H15	Tank 4	11	34	nighttime supersaturation
H16	Tank 3		34	nighttime supersaturation
H17	Tank 1		34	nighttime supersaturation
H18	Tank 2		34	nighttime supersaturation
H19	Tank 4	14	34	nighttime supersaturation
H20	Tank 3		34	nighttime supersaturation
H21	Tank 1		34	nighttime supersaturation
H22	Tank 2	10	34	nighttime supersaturation
H23	Tank 4	11	34	nighttime supersaturation
H24	Tank 3	6	34	nighttime supersaturation
N1	Tank 4		35	100% air saturation
N2	Tank 2	20	35	100% air saturation
N3	Tank 1		35	100% air saturation
N4	Tank 3		35	100% air saturation
N5	Tank 4	16	35	100% air saturation
N6	Tank 2		35	100% air saturation
N7	Tank 1	18	35	100% air saturation
N8	Tank 3	16	35	100% air saturation
N9	Tank 4		35	100% air saturation
N10	Tank 2	8	35	100% air saturation
N11	Tank 1	45	35	100% air saturation
N12	Tank 3	19	35	100% air saturation
N13	Tank 4		35	100% air saturation
N14	Tank 2	10	35	100% air saturation
N15	Tank 1		35	100% air saturation
N16	Tank 3		35	100% air saturation
N17	Tank 4		35	100% air saturation
N18	Tank 2	10	35	100% air saturation
N19	Tank 1		35	100% air saturation
N20	Tank 3	21	35	100% air saturation
N21	Tank 4	11	35	100% air saturation
N22	Tank 2		35	100% air saturation
N23	Tank 1	19	35	100% air saturation
N24	Tank 3		35	100% air saturation
H1	Tank 1		35	nighttime supersaturation
H2	Tank 2		35	nighttime supersaturation
H3	Tank 4		35	nighttime supersaturation
H4	Tank 3		35	nighttime supersaturation
H5	Tank 1		35	nighttime supersaturation
H6	Tank 2		35	nighttime supersaturation
H7	Tank 4		35	nighttime supersaturation
H8	Tank 3	14	35	nighttime supersaturation
H9	Tank 1	10	35	nighttime supersaturation
H10	Tank 2	8	35	nighttime supersaturation
H11	Tank 4		35	nighttime supersaturation
H12	Tank 3		35	nighttime supersaturation
H13	Tank 1		35	nighttime supersaturation
H14	Tank 2		35	nighttime supersaturation
H15	Tank 4		35	nighttime supersaturation
H16	Tank 3		35	nighttime supersaturation
H17	Tank 1		35	nighttime supersaturation
H18	Tank 2		35	nighttime supersaturation
H19	Tank 4	7	35	nighttime supersaturation
H20	Tank 3		35	nighttime supersaturation
H21	Tank 1	9	35	nighttime supersaturation
H22	Tank 2	11	35	nighttime supersaturation
H23	Tank 4		35	nighttime supersaturation
H24	Tank 3	16	35	nighttime supersaturation
N1	Tank 4		36	100% air saturation
N2	Tank 2		36	100% air saturation
N3	Tank 1		36	100% air saturation
N4	Tank 3		36	100% air saturation
N5	Tank 4	21	36	100% air saturation
N6	Tank 2		36	100% air saturation
N7	Tank 1	30	36	100% air saturation
N8	Tank 3	13	36	100% air saturation
N9	Tank 4		36	100% air saturation
N10	Tank 2	10	36	100% air saturation
N11	Tank 1	38	36	100% air saturation
N12	Tank 3	20	36	100% air saturation
N13	Tank 4		36	100% air saturation
N14	Tank 2	20	36	100% air saturation
N15	Tank 1		36	100% air saturation
N16	Tank 3		36	100% air saturation
N17	Tank 4	43	36	100% air saturation
N18	Tank 2		36	100% air saturation
N19	Tank 1		36	100% air saturation
N20	Tank 3	22	36	100% air saturation
N21	Tank 4	21	36	100% air saturation
N22	Tank 2		36	100% air saturation
N23	Tank 1	23	36	100% air saturation
N24	Tank 3		36	100% air saturation
H1	Tank 1		36	nighttime supersaturation
H2	Tank 2		36	nighttime supersaturation
H3	Tank 4		36	nighttime supersaturation
H4	Tank 3		36	nighttime supersaturation
H5	Tank 1		36	nighttime supersaturation
H6	Tank 2		36	nighttime supersaturation
H7	Tank 4		36	nighttime supersaturation
H8	Tank 3	19	36	nighttime supersaturation
H9	Tank 1	18	36	nighttime supersaturation
H10	Tank 2	15	36	nighttime supersaturation
H11	Tank 4		36	nighttime supersaturation
H12	Tank 3		36	nighttime supersaturation
H13	Tank 1		36	nighttime supersaturation
H14	Tank 2		36	nighttime supersaturation
H15	Tank 4	18	36	nighttime supersaturation
H16	Tank 3		36	nighttime supersaturation
H17	Tank 1		36	nighttime supersaturation
H18	Tank 2		36	nighttime supersaturation
H19	Tank 4		36	nighttime supersaturation
H20	Tank 3		36	nighttime supersaturation
H21	Tank 1	21	36	nighttime supersaturation
H22	Tank 2	12	36	nighttime supersaturation
H23	Tank 4	11	36	nighttime supersaturation
H24	Tank 3	13	36	nighttime supersaturation
N1	Tank 4		37	100% air saturation
N2	Tank 2		37	100% air saturation
N3	Tank 1		37	100% air saturation
N4	Tank 3		37	100% air saturation
N5	Tank 4		37	100% air saturation
N6	Tank 2		37	100% air saturation
N7	Tank 1		37	100% air saturation
N8	Tank 3	17	37	100% air saturation
N9	Tank 4		37	100% air saturation
N10	Tank 2	5	37	100% air saturation
N11	Tank 1		37	100% air saturation
N12	Tank 3	24	37	100% air saturation
N13	Tank 4		37	100% air saturation
N14	Tank 2		37	100% air saturation
N15	Tank 1		37	100% air saturation
N16	Tank 3		37	100% air saturation
N17	Tank 4		37	100% air saturation
N18	Tank 2	9	37	100% air saturation
N19	Tank 1		37	100% air saturation
N20	Tank 3		37	100% air saturation
N21	Tank 4		37	100% air saturation
N22	Tank 2		37	100% air saturation
N23	Tank 1	21	37	100% air saturation
N24	Tank 3		37	100% air saturation
H1	Tank 1		37	nighttime supersaturation
H2	Tank 2	32	37	nighttime supersaturation
H3	Tank 4		37	nighttime supersaturation
H4	Tank 3		37	nighttime supersaturation
H5	Tank 1		37	nighttime supersaturation
H6	Tank 2		37	nighttime supersaturation
H7	Tank 4		37	nighttime supersaturation
H8	Tank 3		37	nighttime supersaturation
H9	Tank 1	25	37	nighttime supersaturation
H10	Tank 2		37	nighttime supersaturation
H11	Tank 4		37	nighttime supersaturation
H12	Tank 3		37	nighttime supersaturation
H13	Tank 1		37	nighttime supersaturation
H14	Tank 2		37	nighttime supersaturation
H15	Tank 4		37	nighttime supersaturation
H16	Tank 3		37	nighttime supersaturation
H17	Tank 1		37	nighttime supersaturation
H18	Tank 2		37	nighttime supersaturation
H19	Tank 4		37	nighttime supersaturation
H20	Tank 3		37	nighttime supersaturation
H21	Tank 1	24	37	nighttime supersaturation
H22	Tank 2		37	nighttime supersaturation
H23	Tank 4		37	nighttime supersaturation
H24	Tank 3		37	nighttime supersaturation

## Sheet: PAM
Sample name	Tank	Temperature (Celsius)	PAM	Oxygen treatment
N1	Tank 4	30		100% air saturation
N2	Tank 2	30	0.678	100% air saturation
N3	Tank 1	30	0.798333	100% air saturation
N4	Tank 3	30	0.810333	100% air saturation
N5	Tank 4	30	0.729	100% air saturation
N6	Tank 2	30		100% air saturation
N7	Tank 1	30	0.749667	100% air saturation
N8	Tank 3	30	0.573	100% air saturation
N9	Tank 4	30	0.827333	100% air saturation
N10	Tank 2	30	0.720667	100% air saturation
N11	Tank 1	30	0.761333	100% air saturation
N12	Tank 3	30	0.625	100% air saturation
N13	Tank 4	30	0.605333	100% air saturation
N14	Tank 2	30	0.782	100% air saturation
N15	Tank 1	30	0.591333	100% air saturation
N16	Tank 3	30	0.572	100% air saturation
N17	Tank 4	30	0.678667	100% air saturation
N18	Tank 2	30	0.762667	100% air saturation
N19	Tank 1	30		100% air saturation
N20	Tank 3	30	0.731	100% air saturation
N21	Tank 4	30	0.837667	100% air saturation
N22	Tank 2	30	0.704333	100% air saturation
N23	Tank 1	30	0.694667	100% air saturation
N24	Tank 3	30	0.745333	100% air saturation
H1	Tank 1	30		nighttime supersaturation
H2	Tank 2	30	0.721333	nighttime supersaturation
H3	Tank 4	30	0.755667	nighttime supersaturation
H4	Tank 3	30	0.718333	nighttime supersaturation
H5	Tank 1	30	0.630667	nighttime supersaturation
H6	Tank 2	30	0.612667	nighttime supersaturation
H7	Tank 4	30	0.746333	nighttime supersaturation
H8	Tank 3	30	0.673667	nighttime supersaturation
H9	Tank 1	30	0.66	nighttime supersaturation
H10	Tank 2	30	0.768	nighttime supersaturation
H11	Tank 4	30	0.807333	nighttime supersaturation
H12	Tank 3	30	0.746667	nighttime supersaturation
H13	Tank 1	30	0.731667	nighttime supersaturation
H14	Tank 2	30	0.714333	nighttime supersaturation
H15	Tank 4	30	0.713	nighttime supersaturation
H16	Tank 3	30	0.762333	nighttime supersaturation
H17	Tank 1	30	0.657333	nighttime supersaturation
H18	Tank 2	30	0.780667	nighttime supersaturation
H19	Tank 4	30	0.803333	nighttime supersaturation
H20	Tank 3	30	0.796	nighttime supersaturation
H21	Tank 1	30	0.819333	nighttime supersaturation
H22	Tank 2	30	0.755667	nighttime supersaturation
H23	Tank 4	30	0.704	nighttime supersaturation
H24	Tank 3	30	0.869667	nighttime supersaturation
N1	Tank 4	31
N2	Tank 2	31	0.630333
N3	Tank 1	31	0.63
N4	Tank 3	31	0.675667
N5	Tank 4	31	0.684667
N6	Tank 2	31
N7	Tank 1	31	0.65
N8	Tank 3	31	0.673
N9	Tank 4	31	0.665667
N10	Tank 2	31	0.684
N11	Tank 1	31	0.728667
N12	Tank 3	31	0.709667
N13	Tank 4	31	0.606
N14	Tank 2	31	0.647333
N15	Tank 1	31	0.727
N16	Tank 3	31	0.568333
N17	Tank 4	31	0.737333
N18	Tank 2	31	0.767333
N19	Tank 1	31
N20	Tank 3	31	0.869667
N21	Tank 4	31	0.687
N22	Tank 2	31	0.637667
N23	Tank 1	31	0.706333
N24	Tank 3	31	0.854333
H1	Tank 1	31
H2	Tank 2	31	0.749
H3	Tank 4	31	0.579667
H4	Tank 3	31	0.631333
H5	Tank 1	31	0.668667
H6	Tank 2	31	0.844667
H7	Tank 4	31	0.758667
H8	Tank 3	31	0.753667
H9	Tank 1	31	0.685
H10	Tank 2	31	0.743333
H11	Tank 4	31	0.582
H12	Tank 3	31	0.609333
H13	Tank 1	31	0.769
H14	Tank 2	31
H15	Tank 4	31	0.715
H16	Tank 3	31	0.721333
H17	Tank 1	31	0.728
H18	Tank 2	31	0.733
H19	Tank 4	31	0.646667
H20	Tank 3	31
H21	Tank 1	31	0.711
H22	Tank 2	31	0.859333
H23	Tank 4	31	0.640333
H24	Tank 3	31	0.739667
N1	Tank 4	32
N2	Tank 2	32	0.674667
N3	Tank 1	32	0.676667
N4	Tank 3	32	0.676
N5	Tank 4	32	0.728333
N6	Tank 2	32
N7	Tank 1	32	0.653
N8	Tank 3	32	0.802333
N9	Tank 4	32	0.743667
N10	Tank 2	32	0.74
N11	Tank 1	32	0.731
N12	Tank 3	32	0.667667
N13	Tank 4	32	0.613667
N14	Tank 2	32	0.769333
N15	Tank 1	32	0.714
N16	Tank 3	32	0.644667
N17	Tank 4	32	0.731667
N18	Tank 2	32	0.744667
N19	Tank 1	32
N20	Tank 3	32	0.704333
N21	Tank 4	32	0.667667
N22	Tank 2	32	0.599
N23	Tank 1	32	0.755333
N24	Tank 3	32	0.828333
H1	Tank 1	32
H2	Tank 2	32	0.870667
H3	Tank 4	32	0.733333
H4	Tank 3	32	0.700667
H5	Tank 1	32	0.531
H6	Tank 2	32
H7	Tank 4	32	0.758667
H8	Tank 3	32	0.534
H9	Tank 1	32	0.479333
H10	Tank 2	32	0.788667
H11	Tank 4	32	0.703333
H12	Tank 3	32	0.624333
H13	Tank 1	32	0.778667
H14	Tank 2	32
H15	Tank 4	32	0.851333
H16	Tank 3	32	0.711
H17	Tank 1	32	0.840667
H18	Tank 2	32	0.646333
H19	Tank 4	32	0.805
H20	Tank 3	32
H21	Tank 1	32	0.718333
H22	Tank 2	32	0.832667
H23	Tank 4	32	0.618333
H24	Tank 3	32	0.718333
N1	Tank 4	33
N2	Tank 2	33	0.720667
N3	Tank 1	33	0.706667
N4	Tank 3	33	0.631333
N5	Tank 4	33	0.688667
N6	Tank 2	33
N7	Tank 1	33	0.655
N8	Tank 3	33	0.513667
N9	Tank 4	33	0.516
N10	Tank 2	33	0.592
N11	Tank 1	33	0.606333
N12	Tank 3	33	0.710333
N13	Tank 4	33	0.523
N14	Tank 2	33	0.520667
N15	Tank 1	33	0.674667
N16	Tank 3	33	0.658333
N17	Tank 4	33	0.604
N18	Tank 2	33	0.676667
N19	Tank 1	33
N20	Tank 3	33	0.697667
N21	Tank 4	33	0.683333
N22	Tank 2	33	0.709
N23	Tank 1	33	0.663
N24	Tank 3	33	0.6
H1	Tank 1	33
H2	Tank 2	33	0.700333
H3	Tank 4	33	0.627333
H4	Tank 3	33	0.523667
H5	Tank 1	33	0.486667
H6	Tank 2	33	0.650333
H7	Tank 4	33	0.569
H8	Tank 3	33	0.683333
H9	Tank 1	33	0.677333
H10	Tank 2	33	0.676667
H11	Tank 4	33	0.560333
H12	Tank 3	33	0.754
H13	Tank 1	33	0.492333
H14	Tank 2	33
H15	Tank 4	33	0.654333
H16	Tank 3	33	0.636667
H17	Tank 1	33	0.698333
H18	Tank 2	33	0.626
H19	Tank 4	33	0.657333
H20	Tank 3	33
H21	Tank 1	33	0.616
H22	Tank 2	33	0.829333
H23	Tank 4	33	0.5
H24	Tank 3	33	0.456
N1	Tank 4	34
N2	Tank 2	34	0.685333
N3	Tank 1	34
N4	Tank 3	34
N5	Tank 4	34	0.681667
N6	Tank 2	34
N7	Tank 1	34	0.620333
N8	Tank 3	34	0.539667
N9	Tank 4	34
N10	Tank 2	34	0.799333
N11	Tank 1	34	0.799667
N12	Tank 3	34	0.661
N13	Tank 4	34	0.691333
N14	Tank 2	34	0.692
N15	Tank 1	34	0.542667
N16	Tank 3	34
N17	Tank 4	34	0.642
N18	Tank 2	34	0.693333
N19	Tank 1	34
N20	Tank 3	34	0.759667
N21	Tank 4	34	0.616667
N22	Tank 2	34
N23	Tank 1	34	0.577
N24	Tank 3	34
H1	Tank 1	34
H2	Tank 2	34	0.602
H3	Tank 4	34
H4	Tank 3	34
H5	Tank 1	34
H6	Tank 2	34
H7	Tank 4	34
H8	Tank 3	34	0.640667
H9	Tank 1	34	0.822667
H10	Tank 2	34	0.623
H11	Tank 4	34
H12	Tank 3	34	0.666667
H13	Tank 1	34
H14	Tank 2	34
H15	Tank 4	34	0.868333
H16	Tank 3	34
H17	Tank 1	34	0.813
H18	Tank 2	34	0.651333
H19	Tank 4	34	0.758667
H20	Tank 3	34
H21	Tank 1	34	0.600667
H22	Tank 2	34	0.442667
H23	Tank 4	34	0.335333
H24	Tank 3	34	0.680333
N1	Tank 4	35
N2	Tank 2	35	0.54
N3	Tank 1	35
N4	Tank 3	35
N5	Tank 4	35	0.640667
N6	Tank 2	35
N7	Tank 1	35	0.711333
N8	Tank 3	35	0.654333
N9	Tank 4	35
N10	Tank 2	35	0.654667
N11	Tank 1	35	0.757
N12	Tank 3	35	0.517
N13	Tank 4	35	0.604667
N14	Tank 2	35	0.567667
N15	Tank 1	35
N16	Tank 3	35
N17	Tank 4	35	0.715667
N18	Tank 2	35	0.622
N19	Tank 1	35
N20	Tank 3	35	0.67
N21	Tank 4	35	0.581
N22	Tank 2	35
N23	Tank 1	35	0.529667
N24	Tank 3	35
H1	Tank 1	35
H2	Tank 2	35	0.681
H3	Tank 4	35
H4	Tank 3	35
H5	Tank 1	35
H6	Tank 2	35
H7	Tank 4	35
H8	Tank 3	35	0.631
H9	Tank 1	35	0.599333
H10	Tank 2	35	0.548667
H11	Tank 4	35
H12	Tank 3	35
H13	Tank 1	35
H14	Tank 2	35
H15	Tank 4	35	0.566667
H16	Tank 3	35
H17	Tank 1	35
H18	Tank 2	35	0.385333
H19	Tank 4	35	0.642
H20	Tank 3	35
H21	Tank 1	35	0.615333
H22	Tank 2	35	0.617333
H23	Tank 4	35	0.467667
H24	Tank 3	35	0.557
N1	Tank 4	36
N2	Tank 2	36
N3	Tank 1	36
N4	Tank 3	36
N5	Tank 4	36	0.863
N6	Tank 2	36
N7	Tank 1	36
N8	Tank 3	36	0.238
N9	Tank 4	36
N10	Tank 2	36	0.508333
N11	Tank 1	36	0.575667
N12	Tank 3	36	0.731333
N13	Tank 4	36	0.702
N14	Tank 2	36	0.507333
N15	Tank 1	36
N16	Tank 3	36
N17	Tank 4	36	0.401333
N18	Tank 2	36	0.631667
N19	Tank 1	36
N20	Tank 3	36	0.665333
N21	Tank 4	36	0.522667
N22	Tank 2	36
N23	Tank 1	36	0.746333
N24	Tank 3	36
H1	Tank 1	36
H2	Tank 2	36	0.576667
H3	Tank 4	36
H4	Tank 3	36
H5	Tank 1	36
H6	Tank 2	36
H7	Tank 4	36
H8	Tank 3	36	0.581333
H9	Tank 1	36	0.715333
H10	Tank 2	36	0.450333
H11	Tank 4	36
H12	Tank 3	36
H13	Tank 1	36
H14	Tank 2	36
H15	Tank 4	36
H16	Tank 3	36
H17	Tank 1	36
H18	Tank 2	36	0.595333
H19	Tank 4	36
H20	Tank 3	36
H21	Tank 1	36	0.436333
H22	Tank 2	36	0.569333
H23	Tank 4	36	0.496
H24	Tank 3	36
N1	Tank 4	37
N2	Tank 2	37
N3	Tank 1	37
N4	Tank 3	37
N5	Tank 4	37
N6	Tank 2	37
N7	Tank 1	37
N8	Tank 3	37	0.443333
N9	Tank 4	37
N10	Tank 2	37	0.406667
N11	Tank 1	37	0.405
N12	Tank 3	37	0.443
N13	Tank 4	37
N14	Tank 2	37	0.436667
N15	Tank 1	37
N16	Tank 3	37
N17	Tank 4	37
N18	Tank 2	37	0.51
N19	Tank 1	37
N20	Tank 3	37
N21	Tank 4	37
N22	Tank 2	37
N23	Tank 1	37	0.714333
N24	Tank 3	37
H1	Tank 1	37
H2	Tank 2	37	0.463667
H3	Tank 4	37
H4	Tank 3	37
H5	Tank 1	37
H6	Tank 2	37
H7	Tank 4	37
H8	Tank 3	37	0.45
H9	Tank 1	37	0.437667
H10	Tank 2	37	0.366667
H11	Tank 4	37
H12	Tank 3	37
H13	Tank 1	37
H14	Tank 2	37
H15	Tank 4	37
H16	Tank 3	37
H17	Tank 1	37
H18	Tank 2	37
H19	Tank 4	37
H20	Tank 3	37
H21	Tank 1	37	0.606
H22	Tank 2	37
H23	Tank 4	37
H24	Tank 3	37

## Sheet: SIZE
Sample name	Tank	Size percent change	Temperature (Celsius)	Oxygen treatment
N8	Tank 3	0	30	100% air saturation
N10	Tank 2	0	30	100% air saturation
N11	Tank 1	0	30	100% air saturation
N12	Tank 3	0	30	100% air saturation
N14	Tank 2	0	30	100% air saturation
N18	Tank 2	0	30	100% air saturation
N23	Tank 1	0	30	100% air saturation
H2	Tank 2	0	30	nighttime supersaturation
H8	Tank 3	0	30	nighttime supersaturation
H9	Tank 1	0	30	nighttime supersaturation
H10	Tank 2	0	30	nighttime supersaturation
H21	Tank 1	0	30	nighttime supersaturation
N8	Tank 3	-15.3846	31	100% air saturation
N10	Tank 2	-4.9505	31	100% air saturation
N11	Tank 1	-3.80952	31	100% air saturation
N12	Tank 3	-7.01754	31	100% air saturation
N14	Tank 2	0	31	100% air saturation
N18	Tank 2	-4.23729	31	100% air saturation
N23	Tank 1	-12.5	31	100% air saturation
H2	Tank 2	-4.16667	31	nighttime supersaturation
H8	Tank 3	5.66038	31	nighttime supersaturation
H9	Tank 1	-1.17647	31	nighttime supersaturation
H10	Tank 2	6.38298	31	nighttime supersaturation
H21	Tank 1	1.06383	31	nighttime supersaturation
N8	Tank 3	-17.6923	32	100% air saturation
N10	Tank 2	-0.990099	32	100% air saturation
N11	Tank 1	-9.52381	32	100% air saturation
N12	Tank 3	-14.9123	32	100% air saturation
N14	Tank 2	1.25	32	100% air saturation
N18	Tank 2	-18.6441	32	100% air saturation
N23	Tank 1	-15.3846	32	100% air saturation
H2	Tank 2	9.375	32	nighttime supersaturation
H8	Tank 3	1.88679	32	nighttime supersaturation
H9	Tank 1	4.70588	32	nighttime supersaturation
H10	Tank 2	10.6383	32	nighttime supersaturation
H21	Tank 1	-2.12766	32	nighttime supersaturation
N8	Tank 3	-14.6154	33	100% air saturation
N10	Tank 2	4.9505	33	100% air saturation
N11	Tank 1	-2.85714	33	100% air saturation
N12	Tank 3	-20.1754	33	100% air saturation
N14	Tank 2	3.75	33	100% air saturation
N18	Tank 2	-5.08475	33	100% air saturation
N23	Tank 1	-9.61538	33	100% air saturation
H2	Tank 2	9.375	33	nighttime supersaturation
H8	Tank 3	3.77358	33	nighttime supersaturation
H9	Tank 1	3.52941	33	nighttime supersaturation
H10	Tank 2	20.2128	33	nighttime supersaturation
H21	Tank 1	8.51064	33	nighttime supersaturation
N8	Tank 3	-12.3077	34	100% air saturation
N10	Tank 2	-9.90099	34	100% air saturation
N11	Tank 1	-8.57143	34	100% air saturation
N12	Tank 3	-21.9298	34	100% air saturation
N14	Tank 2	-2.5	34	100% air saturation
N18	Tank 2	-12.7119	34	100% air saturation
N23	Tank 1	-17.3077	34	100% air saturation
H2	Tank 2	-2.08333	34	nighttime supersaturation
H8	Tank 3	-10.3774	34	nighttime supersaturation
H9	Tank 1	-3.52941	34	nighttime supersaturation
H10	Tank 2	-4.25532	34	nighttime supersaturation
H21	Tank 1	5.31915	34	nighttime supersaturation
N8	Tank 3	-17.6923	35	100% air saturation
N10	Tank 2	-11.8812	35	100% air saturation
N11	Tank 1	-9.52381	35	100% air saturation
N12	Tank 3	-14.0351	35	100% air saturation
N14	Tank 2	-7.5	35	100% air saturation
N18	Tank 2	-17.7966	35	100% air saturation
N23	Tank 1	-24.0385	35	100% air saturation
H2	Tank 2	11.4583	35	nighttime supersaturation
H8	Tank 3	1.88679	35	nighttime supersaturation
H9	Tank 1	11.7647	35	nighttime supersaturation
H10	Tank 2	9.57447	35	nighttime supersaturation
H21	Tank 1	8.51064	35	nighttime supersaturation
N8	Tank 3	-18.4615	36	100% air saturation
N10	Tank 2	3.9604	36	100% air saturation
N11	Tank 1	-3.80952	36	100% air saturation
N12	Tank 3	-7.01754	36	100% air saturation
N14	Tank 2	-7.5	36	100% air saturation
N18	Tank 2	-10.1695	36	100% air saturation
N23	Tank 1	-15.3846	36	100% air saturation
H2	Tank 2	-1.04167	36	nighttime supersaturation
H8	Tank 3	-10.3774	36	nighttime supersaturation
H9	Tank 1	-8.23529	36	nighttime supersaturation
H10	Tank 2	-3.19149	36	nighttime supersaturation
H21	Tank 1	0	36	nighttime supersaturation
N8	Tank 3	-34.6154	37	100% air saturation
N10	Tank 2	-39.604	37	100% air saturation
N11	Tank 1	-27.619	37	100% air saturation
N12	Tank 3	-36.8421	37	100% air saturation
N14	Tank 2	-31.25	37	100% air saturation
N18	Tank 2	-24.5763	37	100% air saturation
N23	Tank 1	-39.4231	37	100% air saturation
H2	Tank 2	-33.3333	37	nighttime supersaturation
H8	Tank 3	-32.0755	37	nighttime supersaturation
H9	Tank 1	-20	37	nighttime supersaturation
H10	Tank 2	-25.5319	37	nighttime supersaturation
H21	Tank 1	-4.25532	37	nighttime supersaturation

## Sheet: Environmental Conditions
Sample name	Oxygen treatment	Time	Day	Measured temperature	pH	DO (%)	DO (mg/L)
H1	nighttime supersaturation	04:00:00	2021-06-09	29.5	8.101	122.3	9.14
H14	nighttime supersaturation	04:00:00	2021-06-09	30.3	8.117	123.3	9.15
H20	nighttime supersaturation	04:00:00	2021-06-09	30.1
H2	nighttime supersaturation	04:00:00	2021-06-09	30.3	8.322	138.1	10.25
H3	nighttime supersaturation	04:00:00	2021-06-09	29.9	8.109	129	9.61
H21	nighttime supersaturation	04:00:00	2021-06-09	30.1	8.313	131.4	9.78
H8	nighttime supersaturation	06:00:00	2021-06-09	30.2
H11	nighttime supersaturation	06:00:00	2021-06-09	30	7.885	112.4	8.37
H13	nighttime supersaturation	06:00:00	2021-06-09	29.9	8.125	132.6	9.99
H17	nighttime supersaturation	06:00:00	2021-06-09	29.9	8.143	122.9	9.19
H18	nighttime supersaturation	06:00:00	2021-06-09	29.9	7.916	102.9	7.7
H24	nighttime supersaturation	06:00:00	2021-06-09	30.1	7.946	123	9.2
H10	nighttime supersaturation	06:00:00	2021-06-09	30.2
H6	nighttime supersaturation	06:00:00	2021-06-09	30	7.885	112.4	8.37
H20	nighttime supersaturation	06:00:00	2021-06-09	29.9	8.125	132.6	9.99
H2	nighttime supersaturation	06:00:00	2021-06-09	29.9	8.143	122.9	9.19
H3	nighttime supersaturation	06:00:00	2021-06-09	29.9	7.916	102.9	7.7
H21	nighttime supersaturation	06:00:00	2021-06-09	30.1	7.946	123	9.2
H9	nighttime supersaturation	08:00:00	2021-06-09	31	8.183	90.1	6.43
H17	nighttime supersaturation	08:00:00	2021-06-09	31.2	8.142	83.2	6.18
H22	nighttime supersaturation	08:00:00	2021-06-09	30.9	8.115	75.2	5.51
H18	nighttime supersaturation	08:00:00	2021-06-09	31.2	8.116	71.4	5.24
H19	nighttime supersaturation	08:00:00	2021-06-09	31	8.203	72	5.3
H4	nighttime supersaturation	08:00:00	2021-06-09	30.9	8.232	81.7	6.02
H10	nighttime supersaturation	10:00:00	2021-06-09	31.1	8.21	89.4	6.58
H13	nighttime supersaturation	10:00:00	2021-06-09	31	8.016	77	5.67
H23	nighttime supersaturation	10:00:00	2021-06-09	31	8.167	76.6	5.65
H4	nighttime supersaturation	10:00:00	2021-06-09	31	8.233	85.4	6.3
H11	nighttime supersaturation	10:00:00	2021-06-09	31	8.217	81.3	5.97
H18	nighttime supersaturation	10:00:00	2021-06-09	31.1	8.102	75.4	5.54
H13	nighttime supersaturation	12:00:00	2021-06-09	30.8	8.008	79.8	5.88
H5	nighttime supersaturation	12:00:00	2021-06-09	31.1	8.141	85.3	6.28
H6	nighttime supersaturation	12:00:00	2021-06-09	31.1	8.128	80.6	5.91
H8	nighttime supersaturation	12:00:00	2021-06-09	31	8.293	87.3	6.42
H3	nighttime supersaturation	12:00:00	2021-06-09	31	8.214	82.1	6.02
H15	nighttime supersaturation	12:00:00	2021-06-09	30.8
H9	nighttime supersaturation	14:00:00	2021-06-09	31	8.214	86.3	6.39
H21	nighttime supersaturation	14:00:00	2021-06-09	30.9	8.138	77.7	5.71
H2	nighttime supersaturation	14:00:00	2021-06-09	31	8.138	86.3	6.45
H7	nighttime supersaturation	14:00:00	2021-06-09	31	8.33	87.2	6.42
H16	nighttime supersaturation	14:00:00	2021-06-09	31	8.245	85.5	6.31
H4	nighttime supersaturation	14:00:00	2021-06-09	31.1	8.142	79.1	5.84
H12	nighttime supersaturation	16:00:00	2021-06-09	30.5	8.336	89.4	6.63
H15	nighttime supersaturation	16:00:00	2021-06-09	30.2	8.637	89	6.64
H17	nighttime supersaturation	16:00:00	2021-06-09	30.3	8.233	81.9	6.09
H9	nighttime supersaturation	16:00:00	2021-06-09	30.6	8.27	83.4	6.18
H22	nighttime supersaturation	16:00:00	2021-06-09	30.8	8.092	73	5.39
H16	nighttime supersaturation	16:00:00	2021-06-09	30.2	8.31	83.3	6.21
H17	nighttime supersaturation	18:00:00	2021-06-09	31.2	8.151	84.7	6.2
H10	nighttime supersaturation	18:00:00	2021-06-09	31.2	8.184	82.1	6
H18	nighttime supersaturation	18:00:00	2021-06-09	30.5	8.037	81.9	6.04
H16	nighttime supersaturation	18:00:00	2021-06-09	31	8.199	71.9	5.28
H8	nighttime supersaturation	18:00:00	2021-06-09	31	8.254	75.1	5.52
H3	nighttime supersaturation	18:00:00	2021-06-09	30.4	8.19	74.6	5.53
H9	nighttime supersaturation	20:00:00	2021-06-09	30.3	8.185	141.3	9.55
H17	nighttime supersaturation	20:00:00	2021-06-09	30.9	8.233	134.8	9.94
H2	nighttime supersaturation	20:00:00	2021-06-09	31	8.193	131.9	9.7
H12	nighttime supersaturation	20:00:00	2021-06-09	31.2	8.233	135.5	9.98
H3	nighttime supersaturation	20:00:00	2021-06-09	31.1	8.189	1.36	10
H23	nighttime supersaturation	20:00:00	2021-06-09	31	8.078	131.5	9.87
H5	nighttime supersaturation	22:00:00	2021-06-09	31	7.99	121.7	8.99
H6	nighttime supersaturation	22:00:00	2021-06-09	31.1	8.009	132.3	9.9
H24	nighttime supersaturation	22:00:00	2021-06-09	30.5	8.106	133.9	9.97
H8	nighttime supersaturation	22:00:00	2021-06-09	30.5	8.133	133.9	9.94
H7	nighttime supersaturation	22:00:00	2021-06-09	30.5	8.158	128.5	9.53
H19	nighttime supersaturation	22:00:00	2021-06-09	30.5	8.244	134.6	9.98
H13	nighttime supersaturation	00:00:00	2021-06-09	30.9	7.914	129.7	9.63
H16	nighttime supersaturation	00:00:00	2021-06-09	30.8	7.998	132.7	9.81
H18	nighttime supersaturation	00:00:00	2021-06-09	30.9	8.115	122.5	9.07
H4	nighttime supersaturation	00:00:00	2021-06-09	30.9	8.05	136.8	10.08
H15	nighttime supersaturation	00:00:00	2021-06-09	31	8.275	135.4	9.98
H11	nighttime supersaturation	00:00:00	2021-06-09	31	8.275	124.5	9.25
H21	nighttime supersaturation	02:00:00	2021-06-09	30.8	8.31	149.5	11.36
H10	nighttime supersaturation	02:00:00	2021-06-09	31.2	8.115	135.1	9.91
H8	nighttime supersaturation	02:00:00	2021-06-09	31	8.005	132.1	9.72
H16	nighttime supersaturation	02:00:00	2021-06-09	30.9	8.019	123.6	9.14
H11	nighttime supersaturation	02:00:00	2021-06-09	31.1	8.208	140.4	10.3
H15	nighttime supersaturation	02:00:00	2021-06-09	30.9	8.11	111	8.21
H10	nighttime supersaturation	09:00:00	2021-06-10	32.1	8.19	79.8	5.81
H13	nighttime supersaturation	09:00:00	2021-06-10	32.1	8.054	74.9	5.39
H23	nighttime supersaturation	09:00:00	2021-06-10	32	8.034	76.4	5.53
H4	nighttime supersaturation	09:00:00	2021-06-10	32	8.085	83	6
H11	nighttime supersaturation	09:00:00	2021-06-10	32.2	8.034	77.4	5.61
H18	nighttime supersaturation	09:00:00	2021-06-10	32.2	8.095	76.8	5.55
H12	nighttime supersaturation	12:00:00	2021-06-11	32.5	8.012	78.8	5.64
H15	nighttime supersaturation	12:00:00	2021-06-11	33.2	8.456	87.6	6.2
H17	nighttime supersaturation	12:00:00	2021-06-11	33.3	8.372	85.4	6.03
H9	nighttime supersaturation	12:00:00	2021-06-11	32.9	8.226	83.3	5.93
H22	nighttime supersaturation	12:00:00	2021-06-11	33	8.157	77.4	5.5
H16	nighttime supersaturation	12:00:00	2021-06-11	32.7	8.315	82	5.83
H5	nighttime supersaturation	15:00:00	2021-06-12	33.8	8.186	87.7	6.14
H2	nighttime supersaturation	15:00:00	2021-06-12	33.5	8.098	82.1	5.71
H24	nighttime supersaturation	15:00:00	2021-06-12	33.9	8.173	80.8	5.68
H8	nighttime supersaturation	15:00:00	2021-06-12	33.3	8.066	82.7	8.86
H7	nighttime supersaturation	15:00:00	2021-06-12	33.9	8.153	83	8.82
H19	nighttime supersaturation	15:00:00	2021-06-12	33.9	8.21	85.6	6.07
H3	nighttime supersaturation	04:00:00	2021-06-13	33.6	8.187	136.4	9.6
H12	nighttime supersaturation	04:00:00	2021-06-13	33.3	7.945	127	9
H17	nighttime supersaturation	04:00:00	2021-06-13	33.9	8.134	137.8	9.65
H19	nighttime supersaturation	04:00:00	2021-06-13	33.9	8.101	127.7	8.89
H2	nighttime supersaturation	04:00:00	2021-06-13	34.1	8.253	137.3	9.7
H18	nighttime supersaturation	04:00:00	2021-06-13	33.9	7.734	120.4	5.58
H9	nighttime supersaturation	06:00:00	2021-06-13	33.4	8.024	134.1	9.56
H22	nighttime supersaturation	06:00:00	2021-06-13	34.5	8.131	118.8	8.21
H19	nighttime supersaturation	06:00:00	2021-06-13	34	8.117	132.9	9.41
H15	nighttime supersaturation	06:00:00	2021-06-13	34.3	8.01	126.1	8.75
H23	nighttime supersaturation	06:00:00	2021-06-13	34.4	8.269	132.8	9.24
H8	nighttime supersaturation	06:00:00	2021-06-13	34.3	8.154	133.7	9.42
H21	nighttime supersaturation	08:00:00	2021-06-13	34.8	8.302	81.5	5.71
H18	nighttime supersaturation	08:00:00	2021-06-13	35	8.302	85	5.86
H23	nighttime supersaturation	08:00:00	2021-06-13	35.1	8.11	79.6	5.5
H24	nighttime supersaturation	08:00:00	2021-06-13	35.1	8.074	83.6	5.78
H19	nighttime supersaturation	08:00:00	2021-06-13	35.1	8.125	86.8	5.99
H2	nighttime supersaturation	08:00:00	2021-06-13	35.3	8.167	80.1	5.5
H9	nighttime supersaturation	10:00:00	2021-06-13	35.1	8.092	87.2	6.01
H21	nighttime supersaturation	10:00:00	2021-06-13	34.8	8.229	86.8	6.01
H22	nighttime supersaturation	10:00:00	2021-06-13	34.9	8.011	85.1	5.97
H2	nighttime supersaturation	10:00:00	2021-06-13	35.3	8.008	82.1	5.67
H8	nighttime supersaturation	10:00:00	2021-06-13	35	7.97	81	5.59
H15	nighttime supersaturation	10:00:00	2021-06-13	34.9	8.166	89.9	6.23
H21	nighttime supersaturation	12:00:00	2021-06-13	34.9	8.224	92.9	6.43
H2	nighttime supersaturation	12:00:00	2021-06-13	35.1	8.008	85.1	5.83
H8	nighttime supersaturation	12:00:00	2021-06-13	35.1	7.945	81.4	5.62
H24	nighttime supersaturation	12:00:00	2021-06-13	35.1	8.164	83.7	5.77
H23	nighttime supersaturation	12:00:00	2021-06-13	34.8	8.135	85.5	5.92
H19	nighttime supersaturation	12:00:00	2021-06-13	35	8.064	84.5	5.99
H21	nighttime supersaturation	14:00:00	2021-06-13	34.9	8.091	93.4	5.77
H2	nighttime supersaturation	14:00:00	2021-06-13	35.4	8.108	96.4	6.5
H23	nighttime supersaturation	14:00:00	2021-06-13	34.7	8.041	87.7	6.1
H8	nighttime supersaturation	14:00:00	2021-06-13	35.1	8.044	84.2	5.8
H19	nighttime supersaturation	14:00:00	2021-06-13	35.1	8.078	89.1	6.14
H15	nighttime supersaturation	14:00:00	2021-06-13	35.1	8.226	93.9	6.47
H9	nighttime supersaturation	16:00:00	2021-06-13	34.5	8.239	91.7	6.35
H21	nighttime supersaturation	16:00:00	2021-06-13	34.7	8.213	81.2	5.62
H10	nighttime supersaturation	16:00:00	2021-06-13	34.8	8.252	85.5	5.87
H24	nighttime supersaturation	16:00:00	2021-06-13	34.7	8.21	81	5.59
H8	nighttime supersaturation	16:00:00	2021-06-13	33.9	8.088	85.3	5.9
H2	nighttime supersaturation	16:00:00	2021-06-13	35	8.171	95.9	6.6
H21	nighttime supersaturation	18:00:00	2021-06-13	34.8	8.115	93.3	6.48
H2	nighttime supersaturation	18:00:00	2021-06-13	35.3	8.066	78.5	5.42
H18	nighttime supersaturation	18:00:00	2021-06-13	34.7	8.012	78.7	5.42
H8	nighttime supersaturation	18:00:00	2021-06-13	34.3	7.951	90.3	6.26
H24	nighttime supersaturation	18:00:00	2021-06-13	34.8	8.169	77.1	5.3
H10	nighttime supersaturation	18:00:00	2021-06-13	34.8	8.17	77.1	5.3
H21	nighttime supersaturation	18:00:00	2021-06-13	34.8	8.115	93.3	6.48
H2	nighttime supersaturation	18:00:00	2021-06-13	35.3	8.066	78.5	5.42
H18	nighttime supersaturation	18:00:00	2021-06-13	34.7	8.012	78.7	5.42
H8	nighttime supersaturation	18:00:00	2021-06-13	34.3	7.951	90.3	6.26
H24	nighttime supersaturation	18:00:00	2021-06-13	34.8	8.169	77.1	5.3
H10	nighttime supersaturation	18:00:00	2021-06-13	34.8	8.17	77.1	5.3
H9	nighttime supersaturation	20:00:00	2021-06-13	34.6	8.097	141.3	9.79
H21	nighttime supersaturation	20:00:00	2021-06-13	34.4	8.168	140.8	9.79
H2	nighttime supersaturation	20:00:00	2021-06-13	34.6	missing	142.7	9.86
H10	nighttime supersaturation	20:00:00	2021-06-13	34.9	8.058	136	9.45
H8	nighttime supersaturation	20:00:00	2021-06-13	34.4	8.064	143.4	10
H15	nighttime supersaturation	20:00:00	2021-06-13	34.7	8.209	135.3	9.43
H21	nighttime supersaturation	22:00:00	2021-06-13	34.9	8.2	138.7	9.64
H10	nighttime supersaturation	22:00:00	2021-06-13	34.7	8.062	147.1	11.46
H24	nighttime supersaturation	22:00:00	2021-06-13	34.9	8.023	135.9	9.42
H8	nighttime supersaturation	22:00:00	2021-06-13	34.9	8.193	139.1	9.59
H2	nighttime supersaturation	22:00:00	2021-06-13	35.3	8.028	142.5	9.82
H15	nighttime supersaturation	22:00:00	2021-06-13	34.9	8.06	129.9	8.89
H9	nighttime supersaturation	00:00:00	2021-06-13	34.9	8.114	140.5	9.75
H10	nighttime supersaturation	00:00:00	2021-06-13	35.3	7.988	134.8	9.28
H18	nighttime supersaturation	00:00:00	2021-06-13	35.1	7.869	122.3	8.48
H24	nighttime supersaturation	00:00:00	2021-06-13	34.9	8.033	131.7	9.18
H15	nighttime supersaturation	00:00:00	2021-06-13	34.6	8.104	126.5	8.84
H2	nighttime supersaturation	00:00:00	2021-06-13	35.3	8.236	140.5	9.69
H21	nighttime supersaturation	02:00:00	2021-06-13	34.9	8.218	134.2	9.27
H9	nighttime supersaturation	02:00:00	2021-06-13	35	8.134	141.7	9.76
H2	nighttime supersaturation	02:00:00	2021-06-13	35.2	8.297	142.4	9.82
H18	nighttime supersaturation	02:00:00	2021-06-13	35	7.847	116.5	8.09
H8	nighttime supersaturation	02:00:00	2021-06-13	34.4	8.227	143	9.9
H15	nighttime supersaturation	02:00:00	2021-06-13	35	8.01	125.4	8.66
H9	nighttime supersaturation	21:00:00	2021-06-14	35.7	7.862	134.8	9.3
H21	nighttime supersaturation	21:00:00	2021-06-14	35.9	8.128	140.3	9.57
H22	nighttime supersaturation	21:00:00	2021-06-14	36.1	8.026	138.7	9.48
H19	nighttime supersaturation	21:00:00	2021-06-14	36	7.925	127.4	8.68
H8	nighttime supersaturation	21:00:00	2021-06-14	35.7	8.096	142	9.66
H15	nighttime supersaturation	21:00:00	2021-06-14	35.5	7.911	126.9	8.69
H21	nighttime supersaturation	00:00:00	2021-06-15	36.7	8.541	138.4	9.29
H9	nighttime supersaturation	00:00:00	2021-06-15	36.6	8.286	142.5	9.69
H2	nighttime supersaturation	00:00:00	2021-06-15	36.7	8.066	141.5	9.52
H10	nighttime supersaturation	00:00:00	2021-06-15	36.8	7.82	139.7	9.39
H8	nighttime supersaturation	00:00:00	2021-06-15	36.8	8.371	140.2	9.35
H10	nighttime supersaturation	04:00:00	2021-06-17	37	8.14	137.2	9.21
H21	nighttime supersaturation	04:00:00	2021-06-17	36.6	8.48	140	9.26
H9	nighttime supersaturation	04:00:00	2021-06-17	36.6	8.17	137.4	9.22
H2	nighttime supersaturation	04:00:00	2021-06-17	37.1	8.34	139.5	9.24
H8	nighttime supersaturation	04:00:00	2021-06-17	36.4	8.31	144.1	9.8
H21	nighttime supersaturation	06:00:00	2021-06-17	36.6	8.41	139.6	9.44
H10	nighttime supersaturation	06:00:00	2021-06-17	37.4	8.09	131.8	8.71
H9	nighttime supersaturation	06:00:00	2021-06-17	37.1	8.17	138.4	9.29
H8	nighttime supersaturation	06:00:00	2021-06-17	37.3	8.37	132.9	8.82
H2	nighttime supersaturation	06:00:00	2021-06-17	37.7	8.32	135.6	8.92
H21	nighttime supersaturation	08:00:00	2021-06-17	37.9	8.32	83.5	5.49
H9	nighttime supersaturation	08:00:00	2021-06-17	38.3	8.4	90.2	6
H2	nighttime supersaturation	08:00:00	2021-06-17	38.1	8.47	85.9	5.62
H10	nighttime supersaturation	08:00:00	2021-06-17	38	8.47	83.6	5.48
H8	nighttime supersaturation	08:00:00	2021-06-17	38	8.52	83.6	5.69
H9	nighttime supersaturation	10:00:00	2021-06-17	38	8.07	88	5.84
H21	nighttime supersaturation	10:00:00	2021-06-17	37.9	7.99	82.7	5.47
H2	nighttime supersaturation	10:00:00	2021-06-17	38.2	8.38	86.1	5.65
H21	nighttime supersaturation	12:00:00	2021-06-17	37.8	8.26	79.6	5.24
H2	nighttime supersaturation	12:00:00	2021-06-17	37.4	8.32	84.9	5.59
H10	nighttime supersaturation	12:00:00	2021-06-17	38	8.14	82.9	5.47
H21	nighttime supersaturation	14:00:00	2021-06-17	38	8.03	75.9	5.01
H2	nighttime supersaturation	14:00:00	2021-06-17	38	8.1	83.1	5.5
H10	nighttime supersaturation	14:00:00	2021-06-17	38.1	8	77.4	5.1
H21	nighttime supersaturation	16:00:00	2021-06-17	36.9	7.98	79.1	5.28
H21	nighttime supersaturation	18:00:00	2021-06-17	37.6	7.92	78.2	5.24
	nighttime supersaturation
N1	100% air saturation	04:00:00	2021-06-09	30	8.368	76.8	5.75
N6	100% air saturation	04:00:00	2021-06-09	30	8.086	73.7	5.47
N19	100% air saturation	04:00:00	2021-06-09	30	8.242	68.7	5.12
N13	100% air saturation	04:00:00	2021-06-09	29.9	8.295	61.9	4.62
N12	100% air saturation	04:00:00	2021-06-09	30	8.229	77.5	5.79
N16	100% air saturation	04:00:00	2021-06-09	30.2	8.095	56.7	4.32
N7	100% air saturation	06:00:00	2021-06-09	29.8	8.229	79.6	5.99
N8	100% air saturation	06:00:00	2021-06-09	29.9	8.094	71.2	5.35
N14	100% air saturation	06:00:00	2021-06-09	30.1	8.281	61.1	4.55
N13	100% air saturation	06:00:00	2021-06-09	30.1	8.345	65.3	4.88
N17	100% air saturation	06:00:00	2021-06-09	29.8	8.216	68.2	5.24
H2	100% air saturation	06:00:00	2021-06-09	30.2	8.341	80.9	6.03
N7	100% air saturation	06:00:00	2021-06-09	29.8	8.229	79.6	5.99
N24	100% air saturation	06:00:00	2021-06-09	29.9	8.094	71.2	5.35
N15	100% air saturation	06:00:00	2021-06-09	30.1	8.281	61.1	4.55
N13	100% air saturation	06:00:00	2021-06-09	30.1	8.345	65.3	4.88
N12	100% air saturation	06:00:00	2021-06-09	29.8	8.216	68.2	5.24
N13	100% air saturation	06:00:00	2021-06-09	30.2	8.341	80.9	6.03
N9	100% air saturation	08:00:00	2021-06-09	31	8.364	93	6.8
N20	100% air saturation	08:00:00	2021-06-09	30.8	8.308	66	4.87
N21	100% air saturation	08:00:00	2021-06-09	30.9	8.308	72.9	5.38
N4	100% air saturation	08:00:00	2021-06-09	30.9	8.208	86	6.34
N14	100% air saturation	08:00:00	2021-06-09	31	8.279	61	4.49
N11	100% air saturation	08:00:00	2021-06-09	30.9	8.306	90.8	6.7
N3	100% air saturation	10:00:00	2021-06-09	30.6	8.186	80.6	5.98
N21	100% air saturation	10:00:00	2021-06-09	31	8.347	73.9	5.46
N24	100% air saturation	10:00:00	2021-06-09	31	8.282	65.4	4.82
N15	100% air saturation	10:00:00	2021-06-09	31.2	8.205	60.4	4.44
N8	100% air saturation	10:00:00	2021-06-09	31	8.514	94.4	6.95
N18	100% air saturation	10:00:00	2021-06-09	31.1	8.327	71.8	5.28
N23	100% air saturation	12:00:00	2021-06-09	30.9	8.174	69.8	5.15
N18	100% air saturation	12:00:00	2021-06-09	30.4	8.381	76.7	5.69
N2	100% air saturation	12:00:00	2021-06-09	31.1	8.364	84.7	6.23
N24	100% air saturation	12:00:00	2021-06-09	31	8.259	63.7	4.69
N5	100% air saturation	12:00:00	2021-06-09	30.9	8.377	91.9	6.79
N12	100% air saturation	12:00:00	2021-06-09	31	8.227	83.6	6.17
N15	100% air saturation	14:00:00	2021-06-09	31	8.202	64.4	4.76
N10	100% air saturation	14:00:00	2021-06-09	31.1	8.361	85.4	6.28
N22	100% air saturation	14:00:00	2021-06-09	31.1	8.215	66.4	4.88
N4	100% air saturation	14:00:00	2021-06-09	31.1	8.381	85.9	6.31
N13	100% air saturation	14:00:00	2021-06-09	31	8.265	66.4	4.88
N9	100% air saturation	14:00:00	2021-06-09	31.1	8.321	84.7	6.22
N2	100% air saturation	16:00:00	2021-06-09	31	8.337	85.2	6.28
N5	100% air saturation	16:00:00	2021-06-09	30.4	8.397	90.5	6.73
N20	100% air saturation	16:00:00	2021-06-09	30.6	8.344	68.2	5.76
N11	100% air saturation	16:00:00	2021-06-09	30.6	8.387	90.5	6.7
N14	100% air saturation	16:00:00	2021-06-09	30.7	8.177	67.1	4.96
N17	100% air saturation	16:00:00	2021-06-09	30.6	8.171	65	4.82
N7	100% air saturation	18:00:00	2021-06-09	30.9	8.364	90.7	6.79
N15	100% air saturation	18:00:00	2021-06-09	30.6	8.102	55.9	4.12
N14	100% air saturation	18:00:00	2021-06-09	30.9	8.113	56.9	4.2
N24	100% air saturation	18:00:00	2021-06-09	30.6	8.226	49.7	3.69
N9	100% air saturation	18:00:00	2021-06-09	30.5	8.299	82.7	6.13
N21	100% air saturation	18:00:00	2021-06-09	30.7	8.413	62.5	4.64
N11	100% air saturation	20:00:00	2021-06-09	30.6	8.196	74.8	5.57
N18	100% air saturation	20:00:00	2021-06-09	30.8	8.285	65.7	4.87
N2	100% air saturation	20:00:00	2021-06-09	30.6	8.308	80.8	5.99
N4	100% air saturation	20:00:00	2021-06-09	30.5	8.233	75.7	5.62
N16	100% air saturation	20:00:00	2021-06-09	30.5	8.164	63.5	4.7
N17	100% air saturation	20:00:00	2021-06-09	30.3	8.158	69.1	5.13
N7	100% air saturation	22:00:00	2021-06-09	30.6	8.294	84.3	6.3
N23	100% air saturation	22:00:00	2021-06-09	30.7	8.156	67.8	5.03
N10	100% air saturation	22:00:00	2021-06-09	31.1	8.145	77.6	5.71
N22	100% air saturation	22:00:00	2021-06-09	31	8	59.3	4.37
N4	100% air saturation	22:00:00	2021-06-09	31	8.084	75.9	5.6
N9	100% air saturation	22:00:00	2021-06-09	31.1	8.293	81.8	6.03
N7	100% air saturation	00:00:00	2021-06-09	31.1	8.231	83.7	6.24
N14	100% air saturation	00:00:00	2021-06-09	30.9	8.134	73.4	5.43
N12	100% air saturation	00:00:00	2021-06-09	30.9	8.214	80.7	5.94
N20	100% air saturation	00:00:00	2021-06-09	30.9	8.251	69.1	5.13
N5	100% air saturation	00:00:00	2021-06-09	31	8.235	76.5	5.63
H9	100% air saturation	00:00:00	2021-06-09	30.9	8.185
N11	100% air saturation	02:00:00	2021-06-09	30.9	8.073	81.4	6.2
N15	100% air saturation	02:00:00	2021-06-09	30.9	8.152	68.9	5.08
N2	100% air saturation	02:00:00	2021-06-09	31.1	8.304	80.7	5.91
N18	100% air saturation	02:00:00	2021-06-09	31	8.11	67.5	4.97
N8	100% air saturation	02:00:00	2021-06-09	30.9	8.107	70	5.15
N17	100% air saturation	02:00:00	2021-06-09	31	8.142	70.9	5.22
N3	100% air saturation	09:00:00	2021-06-10	31.9	8.207	86.5	6.3
N21	100% air saturation	09:00:00	2021-06-10	32.1	8.279	82.4	5.97
N24	100% air saturation	09:00:00	2021-06-10	32.1	8.172	74.7	5.41
N15	100% air saturation	09:00:00	2021-06-10	32.2	8.112	78.4	5.68
N8	100% air saturation	09:00:00	2021-06-10	32.2	8.282	92.8	6.7
N18	100% air saturation	09:00:00	2021-06-10	32.3	8.171	76.3	5.51
N2	100% air saturation	12:00:00	2021-06-11	33	8.214	89.9	6.46
N5	100% air saturation	12:00:00	2021-06-11	32.6	8.26	89.8	6.41
N20	100% air saturation	12:00:00	2021-06-11	32.8	8.253	78.5	5.61
N11	100% air saturation	12:00:00	2021-06-11	32.7	8.3	92.1	6.59
N14	100% air saturation	12:00:00	2021-06-11	33	8.076	72.6	5.16
N17	100% air saturation	12:00:00	2021-06-11	32.6	8.189	78.1	5.58
N7	100% air saturation	15:00:00	2021-06-12	33.7	8.135	90.8	6.38
N23	100% air saturation	15:00:00	2021-06-12	33.8	8.149	84.5	6.19
N10	100% air saturation	15:00:00	2021-06-12	34.1	8.208	91.7	6.4
N22	100% air saturation	15:00:00	2021-06-12	34	8.239	78.8	5.45
N23	100% air saturation	15:00:00	2021-06-12	33.8	8.184	81	5.67
N9	100% air saturation	15:00:00	2021-06-12	33.7	8.331	92.1	6.52
N9	100% air saturation	04:00:00	2021-06-13	34	8.205	83.4	5.88
N16	100% air saturation	04:00:00	2021-06-13	33.8	8.253	78.9	5.56
N22	100% air saturation	04:00:00	2021-06-13	34	7.888	70.2	4.94
N23	100% air saturation	04:00:00	2021-06-13	33.7	8.208	79.7	5.65
N11	100% air saturation	04:00:00	2021-06-13	33.9	8.225	82.5	5.77
N8	100% air saturation	04:00:00	2021-06-13	33.5	8.145	44.6	3.16
N23	100% air saturation	06:00:00	2021-06-13	33.7	8.234	77.8	5.54
N15	100% air saturation	06:00:00	2021-06-13	34	7.855	68.6	4.78
N10	100% air saturation	06:00:00	2021-06-13	34.4	7.994	79.8	5.57
N12	100% air saturation	06:00:00	2021-06-13	34	8.247	84.2	5.9
N11	100% air saturation	06:00:00	2021-06-13	34.2	8.219	82.1	5.72
N5	100% air saturation	06:00:00	2021-06-13	33.9	8.126	80.9	8.72
N11	100% air saturation	08:00:00	2021-06-13	35.1	8.188	93	6.49
N10	100% air saturation	08:00:00	2021-06-13	34.8	8.189	95.6	6.61
N18	100% air saturation	08:00:00	2021-06-13	34.8	8.197	85.8	5.9
N5	100% air saturation	08:00:00	2021-06-13	35	8.219	94.2	6.52
N20	100% air saturation	08:00:00	2021-06-13	35.1	8.238	101.5	7.05
N7	100% air saturation	08:00:00	2021-06-13	35	8.153	91.1	6.29
N7	100% air saturation	10:00:00	2021-06-13	34.8	8.095	93.8	6.5
N2	100% air saturation	10:00:00	2021-06-13	35.4	8.199	99.1	6.82
N18	100% air saturation	10:00:00	2021-06-13	35.1	8.016	76	5.24
N20	100% air saturation	10:00:00	2021-06-13	35	8.29	83.4	5.75
N5	100% air saturation	10:00:00	2021-06-13	35	8.185	94.9	6.54
N11	100% air saturation	10:00:00	2021-06-13	35	8.133	95.7	6.63
N7	100% air saturation	12:00:00	2021-06-13	34.9	8.177	93.8	6.56
N18	100% air saturation	12:00:00	2021-06-13	34.8	8.067	76	5.24
N2	100% air saturation	12:00:00	2021-06-13	35.4	8.292	93.8	6.44
N12	100% air saturation	12:00:00	2021-06-13	35	8.212	92.6	6.38
N21	100% air saturation	12:00:00	2021-06-13	34.7	8.252	79.5	5.48
N23	100% air saturation	12:00:00	2021-06-13	35	8.029	73.8	5.08
N23	100% air saturation	14:00:00	2021-06-13	34.9	7.985	81.5	5.66
N2	100% air saturation	14:00:00	2021-06-13	35.3	8.306	98.9	6.78
N18	100% air saturation	14:00:00	2021-06-13	35.4	8.04	76.6	5.24
N10	100% air saturation	14:00:00	2021-06-13	35.5	8.178	93.9	6.41
N8	100% air saturation	14:00:00	2021-06-13	35	8.288	98.4	6.76
N17	100% air saturation	14:00:00	2021-06-13	35.1	8.109	77.9	5.34
N5	100% air saturation	16:00:00	2021-06-13	35.1	8.352	98.7	6.87
N10	100% air saturation	16:00:00	2021-06-13	34.5	8.266	9-5.4	6.57
N18	100% air saturation	16:00:00	2021-06-13	34.9	8.111	77.5	5.53
N11	100% air saturation	16:00:00	2021-06-13	34.6	8.366	96.4	6.64
N17	100% air saturation	16:00:00	2021-06-13	34.4	8.153	77.6	5.35
N21	100% air saturation	16:00:00	2021-06-13	34.7	8.355	78.5	5.4
N11	100% air saturation	18:00:00	2021-06-13	35.1	8.242	91.6	6.34
N23	100% air saturation	18:00:00	2021-06-13	34.9	7.954	73.3	5.05
N2	100% air saturation	18:00:00	2021-06-13	35.4	8.228	87.1	5.96
N8	100% air saturation	18:00:00	2021-06-13	34.2	8.322	83.3	5.76
N5	100% air saturation	18:00:00	2021-06-13	35	8.183	87.2	6.01
N17	100% air saturation	18:00:00	2021-06-13	35	8.058	75.8	5.21
N11	100% air saturation	18:00:00	2021-06-13	35.1	8.242	91.6	6.34
N23	100% air saturation	18:00:00	2021-06-13	34.9	7.954	73.3	5.05
N2	100% air saturation	18:00:00	2021-06-13	35.4	8.228	87.1	5.96
N8	100% air saturation	18:00:00	2021-06-13	34.2	8.322	83.3	5.76
N5	100% air saturation	18:00:00	2021-06-13	35	8.183	87.2	6.01
N17	100% air saturation	18:00:00	2021-06-13	35	8.058	75.8	5.21
N23	100% air saturation	20:00:00	2021-06-13	34.8	8.136	80	5.51
N18	100% air saturation	20:00:00	2021-06-13	35.2	8.108	80.8	5.58
N2	100% air saturation	20:00:00	2021-06-13	34.9	8.25	83.9	5.78
N8	100% air saturation	20:00:00	2021-06-13	34.9	8.225	82.1	5.67
N20	100% air saturation	20:00:00	2021-06-13	34.9	8.207	76.2	5.23
N5	100% air saturation	20:00:00	2021-06-13	34.5	8.278	86.6	5.99
N5	100% air saturation	22:00:00	2021-06-13	35	8.257	84.3	5.83
N23	100% air saturation	22:00:00	2021-06-13	34.5	8.299	82.5	5.79
N14	100% air saturation	22:00:00	2021-06-13	35.2	8.134	80.7	5.55
N2	100% air saturation	22:00:00	2021-06-13	35.3	8.213	84	5.78
N20	100% air saturation	22:00:00	2021-06-13	35	8.159	70.1	4.87
N11	100% air saturation	22:00:00	2021-06-13	35	8.162	83.2	5.77
N23	100% air saturation	00:00:00	2021-06-13	33.7	8.246	82.7	5.81
N11	100% air saturation	00:00:00	2021-06-13	34.8	8.292	85.5	5.98
N10	100% air saturation	00:00:00	2021-06-13	34.6	7.98	77	5.35
N12	100% air saturation	00:00:00	2021-06-13	34.8	8.235	85.4	5.84
N17	100% air saturation	00:00:00	2021-06-13	34.9	8.181	81.4	5.62
N18	100% air saturation	00:00:00	2021-06-13	35.1	8.237	80.3	5.55
N11	100% air saturation	02:00:00	2021-06-13	34.8	8.163	84.8	5.93
N14	100% air saturation	02:00:00	2021-06-13	34.8	8.263	81.3	5.66
N5	100% air saturation	02:00:00	2021-06-13	35	8.243	84.5	5.84
N18	100% air saturation	02:00:00	2021-06-13	35.2	8.302	81	5.59
N20	100% air saturation	02:00:00	2021-06-13	34.9	8.132	79.2	5.5
N8	100% air saturation	02:00:00	2021-06-13	34.9	8.183	82.9	5.73
N23	100% air saturation	21:00 PM	2021-06-14	35.8	8.223	83.9	5.79
N2	100% air saturation	21:00 PM	2021-06-14	36.1	8.145	86.4	5.86
N10	100% air saturation	21:00 PM	2021-06-14	36.3	8.088	81.1	5.48
N20	100% air saturation	21:00 PM	2021-06-14	35.6	8.188	81.2	5.52
N5	100% air saturation	21:00 PM	2021-06-14	36.1	8.225	85.3	5.78
N18	100% air saturation	21:00 PM	2021-06-14	36.1	8.28	80.8	5.47
N11	100% air saturation	00:00:00	2021-06-15	36.7	8.134	86.8	5.92
N10	100% air saturation	00:00:00	2021-06-15	36.6	7.935	85.8	5.77
N18	100% air saturation	00:00:00	2021-06-15	36.5	8.293	86.7	5.84
N12	100% air saturation	00:00:00	2021-06-15	37	8.365	84	5.59
N8	100% air saturation	24:00 AM	2021-06-15	37	8.249	82.5	5.49
N14	100% air saturation	24:00 AM	2021-06-15	36.3	8.167	85.6	5.79
N12	100% air saturation	04:00:00	2021-06-17	36.7	8.25	86.4	5.81
N8	100% air saturation	04:00:00	2021-06-17	37	8.17	83.7	5.61
N14	100% air saturation	04:00:00	2021-06-17	37	8.3	83.6	5.58
N10	100% air saturation	04:00:00	2021-06-17	37.1	8.19	80.6	5.35
N18	100% air saturation	04:00:00	2021-06-17	36.8	8.39	84.5	5.63
N23	100% air saturation	04:00:00	2021-06-17	36.8	8.32	89.1	5.97
N23	100% air saturation	06:00:00	2021-06-17	37.2	8.4	87.9	5.84
N8	100% air saturation	06:00:00	2021-06-17	37.6	8.13	82.1	5.42
N14	100% air saturation	06:00:00	2021-06-17	36.8	8.37	84.6	5.71
N10	100% air saturation	06:00:00	2021-06-17	37.4	8.15	80.4	5.35
N18	100% air saturation	06:00:00	2021-06-17	37	8.44	83.8	5.57
N11	100% air saturation	06:00:00	2021-06-17	37.2	8.15	85.2	5.67
N23	100% air saturation	08:00:00	2021-06-17	38	8.28	93.5	6.16
N18	100% air saturation	08:00:00	2021-06-17	38	8.3	90.6	5.93
N10	100% air saturation	08:00:00	2021-06-17	38.1	8.46	93.7	6.29
N11	100% air saturation	08:00:00	2021-06-17	38	8.27	91	5.98
N8	100% air saturation	08:00:00	2021-06-17	38	8.33	88.3	5.82
N14	100% air saturation	08:00:00	2021-06-17	38.1	8.24	93.6	6.16
N23	100% air saturation	10:00:00	2021-06-17	37.5	8.14	94.4	6.31
N11	100% air saturation	10:00:00	2021-06-17	38.1	8.07	91.6	6.09
N12	100% air saturation	10:00:00	2021-06-17	37.9	8.2	93.9	3.21
N18	100% air saturation	10:00:00	2021-06-17	37.7	8.28	91.2	6.04
N8	100% air saturation	10:00:00	2021-06-17	38	7.97	91.1	6
N14	100% air saturation	10:00:00	2021-06-17	38	8.3	89.6	5.89
N23	100% air saturation	12:00:00	2021-06-17	37.8	8.42	91.8	6.08
N11	100% air saturation	12:00:00	2021-06-17	37.7	8.25	92.5	6.16
N12	100% air saturation	12:00:00	2021-06-17	37.8	8.43	94.3	6.25
N8	100% air saturation	12:00:00	2021-06-17	37.9	8.14	90.8	6
N11	100% air saturation	14:00:00	2021-06-17	37.8	8.2	91.4	6.06
N8	100% air saturation	14:00:00	2021-06-17	38.1	8.07	89.5	5.88
N23	100% air saturation	14:00:00	2021-06-17	37.9	8.29	93.7	6.2
N12	100% air saturation	14:00:00	2021-06-17	37.9	8.39	93.6	6.17
N23	100% air saturation	16:00:00	2021-06-17	37.9	8.28	92.9	6.19
N12	100% air saturation	16:00:00	2021-06-17	37.5	8.42	94	6.32
N23	100% air saturation	18:00:00	2021-06-17	37.8	8.38	90.8	6.07
N12	100% air saturation	18:00:00	2021-06-17	37.4	8.25	92.4	6.18
N23	100% air saturation	20:00:00	2021-06-17	37.5	8.4	88.4	5.96
N12	100% air saturation	20:00:00	2021-06-17	37.8	8.28	88.2	5.92
N23	100% air saturation	22:00:00	2021-06-17	37.6	8.49	84.2	5.55
N12	100% air saturation	22:00:00	2021-06-17	37.5	8.27	87.5	5.84
N23	100% air saturation	00:00:00	2021-06-17	37.5	8.37	86.4	5.75
N12	100% air saturation	00:00:00	2021-06-17	37.8	8.27	86.1	5.7
N23	100% air saturation	02:00:00	2021-06-17	38	8.2	88.2	5.85
N12	100% air saturation	02:00:00	2021-06-17	37.7	8.27	88	5.83
N12	100% air saturation	03:00:00	2021-06-17	38	8.197	88.2	5.85
N23	100% air saturation	03:00:00	2021-06-17	37.7	8.271	88	5.83
