# Supplementary material for: Oxygen supersaturation adds resistance to a cnidarian: Symbiodiniaceae holobiont under moderate warming in experimental settings
Source: Frontiers journal article supplement (doi:10.3389/fmars.2024.1305674), 2024-06-12
Supplement: Table_2.XLSX [file Table_2.XLSX]

## Sheet: 30C
taxon_id	treatment_1	treatment_2	tax_name	regex_match	log2_median_ratio	median_diff	mean_diff	wilcox_p_value
if	Hyperoxia	Normoxia	g	Wenyingzhuangia	-100	-41	-76.3333	0.00833652
av	Hyperoxia	Normoxia	c	Oligoflexia	-5.86584	-10489	-9028.44	0.0216164
bz	Hyperoxia	Normoxia	o	Oligoflexales	-5.86584	-10489	-9028.44	0.0216164
el	Hyperoxia	Normoxia	f	Oligoflexales	-5.86584	-10489	-9028.44	0.0216164
hk	Hyperoxia	Normoxia	g	Pseudobacteriovorax	-5.86584	-10489	-9028.44	0.0216164
ae	Hyperoxia	Normoxia	p	Bdellovibrionota	-5.80411	-10481	-9023.67	0.0314685
cq	Hyperoxia	Normoxia	o	Puniceispirillales	0	0	16.2222	0.0336873
fg	Hyperoxia	Normoxia	f	SAR116_clade	0	0	16.2222	0.0336873
al	Hyperoxia	Normoxia	p	Desulfobacterota	0	0	-23.8889	0.0338606
bi	Hyperoxia	Normoxia	c	Desulfuromonadia	0	0	-23.8889	0.0338606
bq	Hyperoxia	Normoxia	c	Leptospirae	0	0	-6	0.0338606
dc	Hyperoxia	Normoxia	o	Bradymonadales	0	0	-23.8889	0.0338606
dv	Hyperoxia	Normoxia	o	Leptospirales	0	0	-6	0.0338606
ec	Hyperoxia	Normoxia	o	Enterobacterales	0	0	7.22222	0.0338606
fr	Hyperoxia	Normoxia	f	Planococcaceae	0	0	3.66667	0.0338606
ft	Hyperoxia	Normoxia	f	Bradymonadales	0	0	-23.8889	0.0338606
gq	Hyperoxia	Normoxia	f	Leptospiraceae	0	0	-6	0.0338606
gx	Hyperoxia	Normoxia	f	Erwiniaceae	0	0	7.22222	0.0338606
it	Hyperoxia	Normoxia	g	Lysinibacillus	0	0	3.66667	0.0338606
iw	Hyperoxia	Normoxia	g	Bradymonadales	0	0	-23.8889	0.0338606
kj	Hyperoxia	Normoxia	g	Leptospira	0	0	-6	0.0338606
kt	Hyperoxia	Normoxia	g	Pantoea	0	0	7.22222	0.0338606
ei	Hyperoxia	Normoxia	f	Flavobacteriaceae	2.09367	9050	5762.67	0.0244344
ad	Hyperoxia	Normoxia	p	Bacteroidota	2.18593	9969	5820.44	0.0244344
as	Hyperoxia	Normoxia	c	Bacteroidia	2.18593	9969	5820.33	0.0244344
bw	Hyperoxia	Normoxia	o	Flavobacteriales	2.20611	10008	5824.78	0.0244344
ib	Hyperoxia	Normoxia	g	Tenacibaculum	2.40798	2705	2522.56	0.0187577
bu	Hyperoxia	Normoxia	o	Rhizobiales	3.02826	995	1055.56	0.0141917
ji	Hyperoxia	Normoxia	g	Flavobacterium	4.42269	961	1676.11	0.00608743
jf	Hyperoxia	Normoxia	g	Devosia	6.18558	1005	966.333	0.0026255
ef	Hyperoxia	Normoxia	f	Devosiaceae	6.31935	1104	1051.89	0.0026661
by	Hyperoxia	Normoxia	o	Coxiellales	0	0	-16.7778	0.077243
dr	Hyperoxia	Normoxia	o	Planctomycetales	0	0	-1.77778	0.077243
ek	Hyperoxia	Normoxia	f	Coxiellaceae	0	0	-16.7778	0.077243
es	Hyperoxia	Normoxia	f	Crocinitomicaceae	0	0	-28.4444	0.077243
hf	Hyperoxia	Normoxia	g	Mesoflavibacter	0	0	-70	0.077243
hg	Hyperoxia	Normoxia	g	Nonlabens	0	0	-16.8889	0.077243
hj	Hyperoxia	Normoxia	g	Coxiella	0	0	-16.7778	0.077243
dp	Hyperoxia	Normoxia	o	Exiguobacterales	#NAME?	-63	-218	0.0871329
gh	Hyperoxia	Normoxia	f	Exiguobacteraceae	#NAME?	-63	-218	0.0871329
jw	Hyperoxia	Normoxia	g	Exiguobacterium	#NAME?	-63	-218	0.0871329
db	Hyperoxia	Normoxia	o	Bacillales	0	0	4.22222	0.0936832
au	Hyperoxia	Normoxia	c	Gammaproteobacteria	1.72698	268	517.556	0.102168
cn	Hyperoxia	Normoxia	o	Legionellales	0	0	-4.11111	0.104858
fa	Hyperoxia	Normoxia	f	Legionellaceae	0	0	-4.11111	0.104858
jx	Hyperoxia	Normoxia	g	Ruegeria	#NAME?	-4	-13.7778	0.131926
jr	Hyperoxia	Normoxia	g	Polaribacter	4.04173	3558	1389.11	0.161497
ax	Hyperoxia	Normoxia	c	Parcubacteria	0	0	4.66667	0.169327
bh	Hyperoxia	Normoxia	c	ABY1	0	0	-2	0.169327
bm	Hyperoxia	Normoxia	c	Sericytochromatia	0	0	-0.666667	0.169327
bp	Hyperoxia	Normoxia	c	Vampirivibrionia	0	0	-3	0.169327
da	Hyperoxia	Normoxia	o	Candidatus_Magasanikbacteria	0	0	-1.44444	0.169327
de	Hyperoxia	Normoxia	o	Verrucomicrobiales	0	0	-1.11111	0.169327
dk	Hyperoxia	Normoxia	o	Candidatus_Pacebacteria	0	0	0.333333	0.169327
dm	Hyperoxia	Normoxia	o	Sericytochromatia	0	0	-0.666667	0.169327
dq	Hyperoxia	Normoxia	o	Staphylococcales	0	0	-6.88889	0.169327
ds	Hyperoxia	Normoxia	o	Diplorickettsiales	0	0	-12.2222	0.169327
fd	Hyperoxia	Normoxia	f	Oxalobacteraceae	0	0	14	0.169327
fp	Hyperoxia	Normoxia	f	Endozoicomonadaceae	0	0	-1.22222	0.169327
fv	Hyperoxia	Normoxia	f	Rubritaleaceae	0	0	-1.11111	0.169327
fz	Hyperoxia	Normoxia	f	Sericytochromatia	0	0	-0.666667	0.169327
gi	Hyperoxia	Normoxia	f	Staphylococcaceae	0	0	-6.88889	0.169327
gj	Hyperoxia	Normoxia	f	Diplorickettsiaceae	0	0	-12.2222	0.169327
hx	Hyperoxia	Normoxia	g	HIMB11	0	0	-4.22222	0.169327
ia	Hyperoxia	Normoxia	g	Maricaulis	0	0	2.11111	0.169327
id	Hyperoxia	Normoxia	g	Massilia	0	0	6.22222	0.169327
io	Hyperoxia	Normoxia	g	NS10_marine_group	0	0	-3.88889	0.169327
ir	Hyperoxia	Normoxia	g	Endozoicomonas	0	0	-1.22222	0.169327
iv	Hyperoxia	Normoxia	g	Porphyrobacter	0	0	2	0.169327
ix	Hyperoxia	Normoxia	g	Rhodopirellula	0	0	19	0.169327
iy	Hyperoxia	Normoxia	g	Rubritalea	0	0	-1.11111	0.169327
jm	Hyperoxia	Normoxia	g	Sericytochromatia	0	0	-0.666667	0.169327
jy	Hyperoxia	Normoxia	g	Staphylococcus	0	0	-6.88889	0.169327
ka	Hyperoxia	Normoxia	g	Maritalea	0	0	84.3333	0.169327
bk	Hyperoxia	Normoxia	c	Acidimicrobiia	0	0	-14	0.179912
df	Hyperoxia	Normoxia	o	Actinomarinales	0	0	-14	0.179912
hh	Hyperoxia	Normoxia	g	NS5_marine_group	3.20328	468	444.556	0.190251
gv	Hyperoxia	Normoxia	f	Methylophilaceae	Inf	37	86.1111	0.212262
kp	Hyperoxia	Normoxia	g	Methylophilus	Inf	37	86.1111	0.212262
ez	Hyperoxia	Normoxia	f	Helicobacteraceae	0	0	31.3333	0.225353
fj	Hyperoxia	Normoxia	f	Pseudomonadaceae	0	0	3.66667	0.225353
il	Hyperoxia	Normoxia	g	Pseudomonas	0	0	3.66667	0.225353
ch	Hyperoxia	Normoxia	o	Micrococcales	0	0	12.4444	0.226455
eu	Hyperoxia	Normoxia	f	Microbacteriaceae	0	0	12.4444	0.226455
cu	Hyperoxia	Normoxia	o	Chitinophagales	#NAME?	-3	-3.66667	0.269245
fk	Hyperoxia	Normoxia	f	Chitinophagaceae	#NAME?	-3	-3.66667	0.269245
in	Hyperoxia	Normoxia	g	Puia	#NAME?	-3	-3.77778	0.269245
cs	Hyperoxia	Normoxia	o	Lactobacillales	0	0	66.7778	0.275196
ac	Hyperoxia	Normoxia	p	Proteobacteria	2.07087	2289	1387.78	0.297326
bd	Hyperoxia	Normoxia	c	WWE3	0	0	83.7778	0.302279
ke	Hyperoxia	Normoxia	g	Erythrobacter	0	0	-62	0.317704
cl	Hyperoxia	Normoxia	o	Burkholderiales	2.05063	44	101	0.362981
ao	Hyperoxia	Normoxia	p	Marinimicrobia_(SAR406_clade)	0	0	1	0.374063
ap	Hyperoxia	Normoxia	p	Elusimicrobiota	0	0	-3	0.374063
aq	Hyperoxia	Normoxia	p	Acidobacteriota	0	0	1	0.374063
aw	Hyperoxia	Normoxia	c	Clostridia	0	0	-3.77778	0.374063
ay	Hyperoxia	Normoxia	c	Saccharimonadia	0	0	0.333333	0.374063
bo	Hyperoxia	Normoxia	c	OM190	0	0	-0.444444	0.374063
br	Hyperoxia	Normoxia	c	Lineage_Iib	0	0	-3	0.374063
bs	Hyperoxia	Normoxia	c	Subgroup_26	0	0	1	0.374063
bt	Hyperoxia	Normoxia	c	Dojkabacteria	0	0	3.44444	0.374063
ca	Hyperoxia	Normoxia	o	Peptostreptococcales-Tissierellales	0	0	-3.77778	0.374063
cc	Hyperoxia	Normoxia	o	Parcubacteria	0	0	4.33333	0.374063
cd	Hyperoxia	Normoxia	o	Saccharimonadales	0	0	0.333333	0.374063
ce	Hyperoxia	Normoxia	o	Parvibaculales	0	0	-14.6667	0.374063
cp	Hyperoxia	Normoxia	o	Propionibacteriales	0	0	-1.22222	0.374063
dd	Hyperoxia	Normoxia	o	Gemmatales	0	0	0.777778	0.374063
dg	Hyperoxia	Normoxia	o	Opitutales	0	0	0.333333	0.374063
dh	Hyperoxia	Normoxia	o	Candidatus_Roizmanbacteria	0	0	-15.8889	0.374063
dj	Hyperoxia	Normoxia	o	Defluviicoccales	0	0	24.1111	0.374063
dl	Hyperoxia	Normoxia	o	Corynebacteriales	0	0	-0.222222	0.374063
do	Hyperoxia	Normoxia	o	GWA2-38-13b	0	0	0.333333	0.374063
du	Hyperoxia	Normoxia	o	Caenarcaniphilales	0	0	-0.222222	0.374063
dw	Hyperoxia	Normoxia	o	Micavibrionales	0	0	0.666667	0.374063
dx	Hyperoxia	Normoxia	o	Granulosicoccales	0	0	6.44444	0.374063
dy	Hyperoxia	Normoxia	o	Cytophagales	0	0	-0.777778	0.374063
dz	Hyperoxia	Normoxia	o	Vampirovibrionales	0	0	-2.77778	0.374063
ea	Hyperoxia	Normoxia	o	BD7-8	0	0	2.33333	0.374063
eb	Hyperoxia	Normoxia	o	Steroidobacterales	0	0	-0.111111	0.374063
ed	Hyperoxia	Normoxia	o	Candidatus_Kerfeldbacteria	0	0	-0.555556	0.374063
ee	Hyperoxia	Normoxia	o	Dojkabacteria	0	0	3.44444	0.374063
em	Hyperoxia	Normoxia	f	Peptostreptococcales-Tissierellales	0	0	-3.77778	0.374063
en	Hyperoxia	Normoxia	f	Caulobacteraceae	0	0	-0.333333	0.374063
eo	Hyperoxia	Normoxia	f	Parcubacteria	0	0	4.33333	0.374063
ep	Hyperoxia	Normoxia	f	Saccharimonadales	0	0	0.333333	0.374063
eq	Hyperoxia	Normoxia	f	PS1_clade	0	0	-14.6667	0.374063
ff	Hyperoxia	Normoxia	f	Nocardioidaceae	0	0	-1.22222	0.374063
fu	Hyperoxia	Normoxia	f	Gemmataceae	0	0	0.777778	0.374063
fw	Hyperoxia	Normoxia	f	Puniceicoccaceae	0	0	0.333333	0.374063
fy	Hyperoxia	Normoxia	f	Nocardiaceae	0	0	-0.222222	0.374063
gd	Hyperoxia	Normoxia	f	Cellvibrionaceae	0	0	0.111111	0.374063
ge	Hyperoxia	Normoxia	f	Crocinitomicaceaea	0	0	-0.555556	0.374063
gf	Hyperoxia	Normoxia	f	Lactobacillaceae	0	0	2.44444	0.374063
gg	Hyperoxia	Normoxia	f	Arcobacteraceae	0	0	-0.222222	0.374063
gm	Hyperoxia	Normoxia	f	Candidatus_Magasanikbacteria	0	0	-0.222222	0.374063
gn	Hyperoxia	Normoxia	f	Rhodocyclaceae	0	0	-5.88889	0.374063
go	Hyperoxia	Normoxia	f	Caenarcaniphilales	0	0	-0.222222	0.374063
gp	Hyperoxia	Normoxia	f	Magnetospiraceae	0	0	0.333333	0.374063
gr	Hyperoxia	Normoxia	f	Micavibrionaceae	0	0	0.666667	0.374063
gt	Hyperoxia	Normoxia	f	Cyclobacteriaceae	0	0	-0.777778	0.374063
gu	Hyperoxia	Normoxia	f	Vampirovibrionales	0	0	-2.77778	0.374063
gw	Hyperoxia	Normoxia	f	Woeseiaceae	0	0	-0.111111	0.374063
gy	Hyperoxia	Normoxia	f	Nitrincolaceae	0	0	0.777778	0.374063
gz	Hyperoxia	Normoxia	f	Candidatus_Kerfeldbacteria	0	0	-0.555556	0.374063
ha	Hyperoxia	Normoxia	f	Dojkabacteria	0	0	3.44444	0.374063
he	Hyperoxia	Normoxia	g	Yangia	0	0	-5.55556	0.374063
hl	Hyperoxia	Normoxia	g	Anaerococcus	0	0	-3.77778	0.374063
hm	Hyperoxia	Normoxia	g	Phenylobacterium	0	0	-0.333333	0.374063
hn	Hyperoxia	Normoxia	g	Parcubacteria	0	0	4.33333	0.374063
ho	Hyperoxia	Normoxia	g	Saccharimonadales	0	0	0.333333	0.374063
hp	Hyperoxia	Normoxia	g	PS1_clade	0	0	-14.6667	0.374063
hq	Hyperoxia	Normoxia	g	Sphingomonas	0	0	-0.111111	0.374063
ih	Hyperoxia	Normoxia	g	Nocardioides	0	0	-1.22222	0.374063
ij	Hyperoxia	Normoxia	g	Blastopirellula	0	0	-0.777778	0.374063
im	Hyperoxia	Normoxia	g	Salinirepens	0	0	-1.11111	0.374063
ip	Hyperoxia	Normoxia	g	Aquibacter	0	0	7.77778	0.374063
is	Hyperoxia	Normoxia	g	Candidatus_Peribacteria	0	0	-1.11111	0.374063
iz	Hyperoxia	Normoxia	g	Pseudoalteromonas	0	0	2	0.374063
ja	Hyperoxia	Normoxia	g	Leucobacter	0	0	0.666667	0.374063
jb	Hyperoxia	Normoxia	g	Cerasicoccus	0	0	0.333333	0.374063
jc	Hyperoxia	Normoxia	g	Crocinitomix	0	0	-27	0.374063
jj	Hyperoxia	Normoxia	g	Rhodococcus	0	0	-0.222222	0.374063
jk	Hyperoxia	Normoxia	g	Robiginitalea	0	0	5.66667	0.374063
jl	Hyperoxia	Normoxia	g	Salegentibacter	0	0	1.44444	0.374063
jq	Hyperoxia	Normoxia	g	Halioxenophilus	0	0	0.111111	0.374063
jt	Hyperoxia	Normoxia	g	Lactobacillus	0	0	2.44444	0.374063
ju	Hyperoxia	Normoxia	g	Ramlibacter	0	0	7.44444	0.374063
jv	Hyperoxia	Normoxia	g	Halarcobacter	0	0	-0.222222	0.374063
jz	Hyperoxia	Normoxia	g	Flavobacteriaceae	0	0	-0.333333	0.374063
kc	Hyperoxia	Normoxia	g	Candidatus_Magasanikbacteria	0	0	-0.222222	0.374063
kf	Hyperoxia	Normoxia	g	Paracoccus	0	0	-4.22222	0.374063
kg	Hyperoxia	Normoxia	g	Mesonia	0	0	-6.33333	0.374063
kh	Hyperoxia	Normoxia	g	Methyloversatilis	0	0	-5.88889	0.374063
ki	Hyperoxia	Normoxia	g	Caenarcaniphilales	0	0	-0.222222	0.374063
kl	Hyperoxia	Normoxia	g	Marinoscillum	0	0	-0.777778	0.374063
km	Hyperoxia	Normoxia	g	Noviherbaspirillum	0	0	7.77778	0.374063
ko	Hyperoxia	Normoxia	g	Vampirovibrionales	0	0	-2.77778	0.374063
kr	Hyperoxia	Normoxia	g	Dokdonia	0	0	4.44444	0.374063
ks	Hyperoxia	Normoxia	g	Woeseia	0	0	-0.111111	0.374063
ku	Hyperoxia	Normoxia	g	Amphritea	0	0	0.777778	0.374063
kw	Hyperoxia	Normoxia	g	Candidatus_Kerfeldbacteria	0	0	-0.555556	0.374063
kx	Hyperoxia	Normoxia	g	SAR116_clade	0	0	4.77778	0.374063
kz	Hyperoxia	Normoxia	g	Dojkabacteria	0	0	3.44444	0.374063
ag	Hyperoxia	Normoxia	p	Patescibacteria	Inf	5	72.2222	0.379794
bv	Hyperoxia	Normoxia	o	Rhodobacterales	-0.460156	-68	-607.222	0.386508
eg	Hyperoxia	Normoxia	f	Rhodobacteraceae	-0.460156	-68	-607.222	0.386508
gb	Hyperoxia	Normoxia	f	Actinomarinaceae	0	0	0	0.396053
jo	Hyperoxia	Normoxia	g	Candidatus_Actinomarina	0	0	0	0.396053
cv	Hyperoxia	Normoxia	o	Rhodospirillales	-4.9386	-89	-167.667	0.421701
iu	Hyperoxia	Normoxia	g	Oceanicaulis	0	0	2.44444	0.433679
ht	Hyperoxia	Normoxia	g	Microbacterium	0	0	11.7778	0.434059
ic	Hyperoxia	Normoxia	g	Pseudofulvibacter	0	0	-56.1111	0.434059
an	Hyperoxia	Normoxia	p	Spirochaetota	#NAME?	-2	1.11111	0.450434
fe	Hyperoxia	Normoxia	f	Pseudoalteromonadaceae	0	0	6.33333	0.467193
ai	Hyperoxia	Normoxia	p	Campilobacterota	0	0	31.1111	0.467232
bb	Hyperoxia	Normoxia	c	Campylobacteria	0	0	31.1111	0.467232
cm	Hyperoxia	Normoxia	o	Campylobacterales	0	0	31.1111	0.467232
ct	Hyperoxia	Normoxia	o	Pseudomonadales	0	0	32.6667	0.48202
gc	Hyperoxia	Normoxia	f	Moraxellaceae	0	0	29	0.48202
jp	Hyperoxia	Normoxia	g	Acinetobacter	0	0	29	0.48202
fl	Hyperoxia	Normoxia	f	Terasakiellaceae	#NAME?	-56	-158.333	0.48832
kq	Hyperoxia	Normoxia	g	Euzebyella	0	0	1	0.496769
cf	Hyperoxia	Normoxia	o	Sphingomonadales	0	0	-51	0.523351
er	Hyperoxia	Normoxia	f	Sphingomonadaceae	0	0	-51	0.523351
cr	Hyperoxia	Normoxia	o	Pirellulales	0	0	18.2222	0.540291
fh	Hyperoxia	Normoxia	f	Pirellulaceae	0	0	18.2222	0.540291
at	Hyperoxia	Normoxia	c	Bdellovibrionia	0	0	4.77778	0.562943
bx	Hyperoxia	Normoxia	o	Bacteriovoracales	0	0	4.77778	0.562943
ej	Hyperoxia	Normoxia	f	Bacteriovoracaceae	0	0	4.77778	0.562943
hi	Hyperoxia	Normoxia	g	Peredibacter	0	0	4.77778	0.562943
ig	Hyperoxia	Normoxia	g	Algicola	0	0	0.333333	0.580167
am	Hyperoxia	Normoxia	p	Verrucomicrobiota	0	0	-0.777778	0.586672
bj	Hyperoxia	Normoxia	c	Verrucomicrobiae	0	0	-0.777778	0.586672
cy	Hyperoxia	Normoxia	o	Oceanospirillales	0	0	-0.444444	0.586672
fi	Hyperoxia	Normoxia	f	Streptococcaceae	0	0	64.3333	0.586672
gk	Hyperoxia	Normoxia	f	Bacillaceae	0	0	0.555556	0.586672
ik	Hyperoxia	Normoxia	g	Streptococcus	0	0	64.3333	0.586672
kb	Hyperoxia	Normoxia	g	Bacillus	0	0	0.555556	0.586672
ar	Hyperoxia	Normoxia	c	Alphaproteobacteria	1.47941	921	870.222	0.604813
az	Hyperoxia	Normoxia	c	Actinobacteria	0	0	11	0.627459
co	Hyperoxia	Normoxia	o	Alteromonadales	-0.321928	-1	6.77778	0.648858
js	Hyperoxia	Normoxia	g	Muricauda	0.125531	2	-39.3333	0.658016
bl	Hyperoxia	Normoxia	c	Microgenomatia	0	0	-15.5556	0.683458
cw	Hyperoxia	Normoxia	o	Rickettsiales	0	0	5.11111	0.683458
ey	Hyperoxia	Normoxia	f	Halieaceae	0	0	0.222222	0.683458
fm	Hyperoxia	Normoxia	f	AB1	0	0	5.11111	0.683458
fx	Hyperoxia	Normoxia	f	Thalassospiraceae	0	0	-9.66667	0.683458
gs	Hyperoxia	Normoxia	f	Weeksellaceae	0	0	2.22222	0.683458
hz	Hyperoxia	Normoxia	g	OM60(NOR5)_clade	0	0	0.222222	0.683458
jh	Hyperoxia	Normoxia	g	Thalassospira	0	0	-9.66667	0.683458
kk	Hyperoxia	Normoxia	g	Chryseobacterium	0	0	2.22222	0.683458
bf	Hyperoxia	Normoxia	c	Cyanobacteriia	0.485427	6	115.333	0.685671
cx	Hyperoxia	Normoxia	o	Synechococcales	0.485427	6	115.333	0.685671
fo	Hyperoxia	Normoxia	f	Cyanobiaceae	0.485427	6	115.333	0.685671
iq	Hyperoxia	Normoxia	g	Synechococcus_CC9902	0.485427	6	115.333	0.685671
aj	Hyperoxia	Normoxia	p	Planctomycetota	#NAME?	-1	16.7778	0.697476
hy	Hyperoxia	Normoxia	g	Cohaesibacter	#NAME?	-13	-35	0.705917
ci	Hyperoxia	Normoxia	o	Vibrionales	-1	-1	8.22222	0.711063
ev	Hyperoxia	Normoxia	f	Vibrionaceae	-1	-1	8.22222	0.711063
hu	Hyperoxia	Normoxia	g	Vibrio	-1	-1	8.22222	0.711063
eh	Hyperoxia	Normoxia	f	Stappiaceae	2.80735	6	6.77778	0.711063
hc	Hyperoxia	Normoxia	g	Labrenzia	2.80735	6	5.55556	0.711063
af	Hyperoxia	Normoxia	p	Firmicutes	-1.29546	-144	1593.44	0.73044
fs	Hyperoxia	Normoxia	f	Alteromonadaceae	0	0	0.444444	0.733912
hw	Hyperoxia	Normoxia	g	Novosphingobium	0	0	-0.111111	0.737223
je	Hyperoxia	Normoxia	g	Limimaricola	0	0	3.55556	0.737432
kn	Hyperoxia	Normoxia	g	Sphingobium	0	0	0.888889	0.737432
cb	Hyperoxia	Normoxia	o	Caulobacterales	0	0	3.55556	0.752357
fb	Hyperoxia	Normoxia	f	Hyphomonadaceae	0	0	3.88889	0.752357
cg	Hyperoxia	Normoxia	o	Xanthomonadales	-1.32193	-3	48.2222	0.784808
et	Hyperoxia	Normoxia	f	Xanthomonadaceae	-1.32193	-3	48.2222	0.784808
hs	Hyperoxia	Normoxia	g	Stenotrophomonas	-1.32193	-3	48.2222	0.784808
be	Hyperoxia	Normoxia	c	Bacilli	-1.29546	-144	1597.22	0.796174
bn	Hyperoxia	Normoxia	c	Spirochaetia	0	0	7.11111	0.833391
dn	Hyperoxia	Normoxia	o	Spirochaetales	0	0	7.11111	0.833391
ga	Hyperoxia	Normoxia	f	Spirochaetaceae	0	0	7.11111	0.833391
jn	Hyperoxia	Normoxia	g	Spirochaeta_2	0	0	7.11111	0.833391
fn	Hyperoxia	Normoxia	f	Cryomorphaceae	Inf	1	91.7778	0.850349
jd	Hyperoxia	Normoxia	g	Allorhizobium-Neorhizobium-Pararhizobium-Rhizobium	0	0	11.8889	0.855691
hb	Hyperoxia	Normoxia	g	Shimia	-0.727315	-59	14.6667	0.863307
ii	Hyperoxia	Normoxia	g	Cognatishimia	0	0	1.22222	0.880168
ah	Hyperoxia	Normoxia	p	Actinobacteriota	0.584963	2	-3	0.893192
fc	Hyperoxia	Normoxia	f	Comamonadaceae	0	0	7	0.91102
jg	Hyperoxia	Normoxia	g	Alteromonas	0	0	-0.111111	0.915928
bc	Hyperoxia	Normoxia	c	Planctomycetes	0	0	17.2222	0.919784
hd	Hyperoxia	Normoxia	g	Winogradskyella	-3.32193	-18	3.11111	0.927516
ex	Hyperoxia	Normoxia	f	Rhizobiaceae	0.459432	18	-3.11111	0.964601
ak	Hyperoxia	Normoxia	p	Cyanobacteria	-0.251539	-4	111.667	1
ab	Hyperoxia	Normoxia	k	Bacteria	0	0	0	1
ba	Hyperoxia	Normoxia	c	Rhodothermia	0	0	0.111111	1
bg	Hyperoxia	Normoxia	c	Gracilibacteria	0	0	-2.44444	1
cj	Hyperoxia	Normoxia	o	Balneolales	0	0	0.111111	1
ck	Hyperoxia	Normoxia	o	Cellvibrionales	0	0	0.333333	1
cz	Hyperoxia	Normoxia	o	Candidatus_Peribacteria	0	0	0.777778	1
di	Hyperoxia	Normoxia	o	Candidatus_Peregrinibacteria	0	0	-3.22222	1
dt	Hyperoxia	Normoxia	o	SAR11_clade	0	0	-2.11111	1
ew	Hyperoxia	Normoxia	f	Balneolaceae	0	0	0.111111	1
fq	Hyperoxia	Normoxia	f	Candidatus_Peribacteria	0	0	0.777778	1
gl	Hyperoxia	Normoxia	f	Clade_I	0	0	-2.11111	1
hr	Hyperoxia	Normoxia	g	NS4_marine_group	0	0	-0.333333	1
hv	Hyperoxia	Normoxia	g	Balneola	0	0	0.111111	1
ie	Hyperoxia	Normoxia	g	Legionella	0	0	0	1
kd	Hyperoxia	Normoxia	g	Aquabacterium	0	0	0.222222	1
kv	Hyperoxia	Normoxia	g	Ponticaulis	0	0	-0.666667	1
ky	Hyperoxia	Normoxia	g	Meridianimaribacter	0	0	0.666667	1

## Sheet: 34C
taxon_id	treatment_1	treatment_2	tax_name	regex_match	log2_median_ratio	median_diff	mean_diff	wilcox_p_value
jc	Hyperoxia	Normoxia	g	Puia	0	0	8.11111	0.0338606
hp	Hyperoxia	Normoxia	g	Shimia	2.31901	395	520.444	0.000781571
he	Hyperoxia	Normoxia	f	Methylophilaceae	100	14	19.4444	0.0018356
lt	Hyperoxia	Normoxia	g	Methylophilus	100	14	19.4444	0.0018356
me	Hyperoxia	Normoxia	g	Polaribacter	100	89	218.667	0.00198159
cc	Hyperoxia	Normoxia	o	Burkholderiales	100	36	65.4444	0.0140862
ke	Hyperoxia	Normoxia	g	Flavobacterium	100	25	26.6667	0.014177
id	Hyperoxia	Normoxia	g	Algicola	100	4	6.77778	0.0226362
jr	Hyperoxia	Normoxia	g	Oceanicaulis	100	1	8.55556	0.0399785
fd	Hyperoxia	Normoxia	f	Hyphomonadaceae	100	4	10	0.0463504
jj	Hyperoxia	Normoxia	g	Aquibacter	100	6	10.8889	0.0583319
fj	Hyperoxia	Normoxia	f	Cyclobacteriaceae	0	0	-4.88889	0.077243
ir	Hyperoxia	Normoxia	g	Terasakiispira	0	0	-2.11111	0.077243
je	Hyperoxia	Normoxia	g	Marixanthomonas	0	0	-3.55556	0.077243
hq	Hyperoxia	Normoxia	g	Labrenzia	-1.51937	-56	-1450.89	0.0932286
bv	Hyperoxia	Normoxia	o	Sphingomonadales	4.22239	53	21.5556	0.120346
el	Hyperoxia	Normoxia	f	Sphingomonadaceae	4.22239	53	21.5556	0.120346
cm	Hyperoxia	Normoxia	o	Caulobacterales	100	4	9.22222	0.13229
ej	Hyperoxia	Normoxia	f	Stappiaceae	-1.53605	-57	-1465.11	0.13312
eu	Hyperoxia	Normoxia	f	Pseudoalteromonadaceae	100	4	-1.55556	0.139087
ch	Hyperoxia	Normoxia	o	Vibrionales	2.32193	8	277.111	0.145526
ey	Hyperoxia	Normoxia	f	Vibrionaceae	2.32193	8	277.111	0.145526
ih	Hyperoxia	Normoxia	g	Vibrio	2.32193	8	277.111	0.145526
hw	Hyperoxia	Normoxia	g	NS5_marine_group	100	36	52.4444	0.152096
bo	Hyperoxia	Normoxia	c	ABY1	0	0	0.444444	0.168589
jp	Hyperoxia	Normoxia	g	Rhodopirellula	0	0	0.888889	0.168589
kj	Hyperoxia	Normoxia	g	Robiginitalea	0	0	-2.22222	0.168589
au	Hyperoxia	Normoxia	c	Clostridia	0	0	15.5556	0.169327
cb	Hyperoxia	Normoxia	o	Peptostreptococcales-Tissierellales	0	0	15.5556	0.169327
cr	Hyperoxia	Normoxia	o	Lactobacillales	0	0	11	0.169327
er	Hyperoxia	Normoxia	f	Peptostreptococcales-Tissierellales	0	0	15.5556	0.169327
fk	Hyperoxia	Normoxia	f	Nocardioidaceae	0	0	32.1111	0.169327
gi	Hyperoxia	Normoxia	f	Moraxellaceae	0	0	1.11111	0.169327
gy	Hyperoxia	Normoxia	f	Weeksellaceae	0	0	3.44444	0.169327
hm	Hyperoxia	Normoxia	f	Hyphomicrobiaceae	0	0	-18.3333	0.169327
iw	Hyperoxia	Normoxia	g	Nocardioides	0	0	32.1111	0.169327
jz	Hyperoxia	Normoxia	g	Mesoflavibacter	0	0	-19.8889	0.169327
kf	Hyperoxia	Normoxia	g	Edaphobaculum	0	0	-11	0.169327
ko	Hyperoxia	Normoxia	g	Acinetobacter	0	0	1.11111	0.169327
li	Hyperoxia	Normoxia	g	Chryseobacterium	0	0	3.44444	0.169327
lr	Hyperoxia	Normoxia	g	Finegoldia	0	0	9.66667	0.169327
mg	Hyperoxia	Normoxia	g	Filomicrobium	0	0	-18.3333	0.169327
mi	Hyperoxia	Normoxia	g	Meridianimaribacter	0	0	-8.66667	0.169327
ht	Hyperoxia	Normoxia	g	Erythrobacter	Inf	18	77	0.180321
ka	Hyperoxia	Normoxia	g	Devosia	Inf	8	8.44444	0.186598
at	Hyperoxia	Normoxia	c	Actinobacteria	0	0	36.7778	0.188604
cg	Hyperoxia	Normoxia	o	Oceanospirillales	0	0	-6	0.188604
ad	Hyperoxia	Normoxia	p	Bacteroidota	1.27047	2894	3034.11	0.190251
aq	Hyperoxia	Normoxia	c	Bacteroidia	1.27047	2894	3034.22	0.190251
bs	Hyperoxia	Normoxia	o	Flavobacteriales	1.27965	2897	3034.11	0.190251
ek	Hyperoxia	Normoxia	f	Flavobacteriaceae	1.34311	2931	3016.56	0.190251
lq	Hyperoxia	Normoxia	g	Sphingobium	0	0	0.888889	0.217443
cq	Hyperoxia	Normoxia	o	Cytophagales	0	0	0.222222	0.21897
ji	Hyperoxia	Normoxia	g	NS10_marine_group	Inf	1	6.88889	0.21897
bt	Hyperoxia	Normoxia	o	Puniceispirillales	0	0	-23.1111	0.225353
eh	Hyperoxia	Normoxia	f	SAR116_clade	0	0	-23.1111	0.225353
fh	Hyperoxia	Normoxia	f	Halomonadaceae	0	0	-2	0.225353
hk	Hyperoxia	Normoxia	f	Nitrincolaceae	0	0	-1.55556	0.225353
il	Hyperoxia	Normoxia	g	NS4_marine_group	0	0	8.33333	0.225353
lz	Hyperoxia	Normoxia	g	Amphritea	0	0	-1.55556	0.225353
hv	Hyperoxia	Normoxia	g	Tenacibaculum	1.42111	1891	3040.78	0.232989
ce	Hyperoxia	Normoxia	o	Alteromonadales	Inf	8	-7.77778	0.242055
bx	Hyperoxia	Normoxia	o	Rhodospirillales	-2.53605	-24	-440.556	0.242308
en	Hyperoxia	Normoxia	f	Terasakiellaceae	-2.53605	-24	-445.111	0.242308
cf	Hyperoxia	Normoxia	o	Staphylococcales	0	0	1.66667	0.248944
ew	Hyperoxia	Normoxia	f	Staphylococcaceae	0	0	1.66667	0.248944
if	Hyperoxia	Normoxia	g	Staphylococcus	0	0	1.66667	0.248944
ag	Hyperoxia	Normoxia	p	Firmicutes	4.98586	5800	792.111	0.297326
aw	Hyperoxia	Normoxia	c	Bacilli	4.96377	5709	776.556	0.297326
af	Hyperoxia	Normoxia	p	Actinobacteriota	0	0	40.4444	0.315202
gb	Hyperoxia	Normoxia	f	Alteromonadaceae	Inf	1	-5.88889	0.315202
jf	Hyperoxia	Normoxia	g	Owenweeksia	0	0	5.88889	0.33208
bu	Hyperoxia	Normoxia	o	Rhodobacterales	0.880905	308	270.333	0.340107
ei	Hyperoxia	Normoxia	f	Rhodobacteraceae	0.880905	308	270.333	0.340107
ak	Hyperoxia	Normoxia	p	Campilobacterota	0	0	-0.444444	0.374063
am	Hyperoxia	Normoxia	p	Myxococcota	0	0	0.333333	0.374063
av	Hyperoxia	Normoxia	c	Rhodothermia	0	0	-0.111111	0.374063
ax	Hyperoxia	Normoxia	c	Saccharimonadia	0	0	-0.111111	0.374063
ba	Hyperoxia	Normoxia	c	WWE3	0	0	0.444444	0.374063
bc	Hyperoxia	Normoxia	c	Vampirivibrionia	0	0	0.222222	0.374063
bf	Hyperoxia	Normoxia	c	Bdellovibrionia	0	0	-1.66667	0.374063
bg	Hyperoxia	Normoxia	c	Microgenomatia	0	0	0.222222	0.374063
bh	Hyperoxia	Normoxia	c	Campylobacteria	0	0	-0.444444	0.374063
bi	Hyperoxia	Normoxia	c	Berkelbacteria	0	0	-2.66667	0.374063
bl	Hyperoxia	Normoxia	c	Parcubacteria	0	0	-0.333333	0.374063
bm	Hyperoxia	Normoxia	c	Polyangia	0	0	0.333333	0.374063
bq	Hyperoxia	Normoxia	c	Dojkabacteria	0	0	1.22222	0.374063
bz	Hyperoxia	Normoxia	o	Candidatus_Peregrinibacteria	0	0	-0.111111	0.374063
cd	Hyperoxia	Normoxia	o	Balneolales	0	0	-0.111111	0.374063
cj	Hyperoxia	Normoxia	o	Saccharimonadales	0	0	-0.111111	0.374063
ck	Hyperoxia	Normoxia	o	Phormidesmiales	0	0	-2.66667	0.374063
cp	Hyperoxia	Normoxia	o	S1-3-65	0	0	-0.111111	0.374063
cs	Hyperoxia	Normoxia	o	JTB23	0	0	0.333333	0.374063
cw	Hyperoxia	Normoxia	o	0319-6G20	0	0	-13.7778	0.374063
cy	Hyperoxia	Normoxia	o	Caenarcaniphilales	0	0	0.222222	0.374063
dc	Hyperoxia	Normoxia	o	Bacteriovoracales	0	0	-1.66667	0.374063
dd	Hyperoxia	Normoxia	o	Milano-WF1B-44	0	0	-0.444444	0.374063
de	Hyperoxia	Normoxia	o	Candidatus_Pacebacteria	0	0	0.222222	0.374063
dg	Hyperoxia	Normoxia	o	Campylobacterales	0	0	-0.444444	0.374063
dh	Hyperoxia	Normoxia	o	Berkelbacteria	0	0	-2.66667	0.374063
dk	Hyperoxia	Normoxia	o	GWA2-38-13b	0	0	-0.333333	0.374063
dl	Hyperoxia	Normoxia	o	Blfdi19	0	0	0.333333	0.374063
dn	Hyperoxia	Normoxia	o	Microtrichales	0	0	0.777778	0.374063
do	Hyperoxia	Normoxia	o	Diplorickettsiales	0	0	0.444444	0.374063
dp	Hyperoxia	Normoxia	o	Francisellales	0	0	-7.22222	0.374063
dr	Hyperoxia	Normoxia	o	Candidatus_Magasanikbacteria	0	0	0.222222	0.374063
ds	Hyperoxia	Normoxia	o	Gracilibacteria	0	0	0.222222	0.374063
du	Hyperoxia	Normoxia	o	Corynebacteriales	0	0	0.333333	0.374063
dw	Hyperoxia	Normoxia	o	SAR11_clade	0	0	-0.111111	0.374063
dx	Hyperoxia	Normoxia	o	Candidatus_Kuenenbacteria	0	0	0.222222	0.374063
dy	Hyperoxia	Normoxia	o	Kiloniellales	0	0	-0.666667	0.374063
ec	Hyperoxia	Normoxia	o	Thalassobaculales	0	0	-0.333333	0.374063
ee	Hyperoxia	Normoxia	o	Dojkabacteria	0	0	1.22222	0.374063
ep	Hyperoxia	Normoxia	f	Candidatus_Peregrinibacteria	0	0	-0.111111	0.374063
et	Hyperoxia	Normoxia	f	Balneolaceae	0	0	-0.111111	0.374063
ev	Hyperoxia	Normoxia	f	Colwelliaceae	0	0	-0.222222	0.374063
ex	Hyperoxia	Normoxia	f	Saccharospirillaceae	0	0	-0.555556	0.374063
ez	Hyperoxia	Normoxia	f	Microbacteriaceae	0	0	-0.444444	0.374063
fa	Hyperoxia	Normoxia	f	Saccharimonadales	0	0	-0.111111	0.374063
fb	Hyperoxia	Normoxia	f	Phormidesmiaceae	0	0	-1.11111	0.374063
fi	Hyperoxia	Normoxia	f	Alcanivoracaceae1	0	0	-0.222222	0.374063
fl	Hyperoxia	Normoxia	f	Streptococcaceae	0	0	5.66667	0.374063
fn	Hyperoxia	Normoxia	f	Amoebophilaceae	0	0	-0.444444	0.374063
fo	Hyperoxia	Normoxia	f	Crocinitomicaceae	0	0	-3.88889	0.374063
fs	Hyperoxia	Normoxia	f	0319-6G20	0	0	-13.7778	0.374063
fu	Hyperoxia	Normoxia	f	Caenarcaniphilales	0	0	0.222222	0.374063
fv	Hyperoxia	Normoxia	f	Endozoicomonadaceae	0	0	-0.111111	0.374063
fx	Hyperoxia	Normoxia	f	Planococcaceae	0	0	1.22222	0.374063
fz	Hyperoxia	Normoxia	f	Bacteriovoracaceae	0	0	-1.66667	0.374063
ga	Hyperoxia	Normoxia	f	Oleiphilaceae	0	0	-1.55556	0.374063
gc	Hyperoxia	Normoxia	f	Pseudomonadaceae	0	0	-0.555556	0.374063
gd	Hyperoxia	Normoxia	f	Helicobacteraceae	0	0	-0.444444	0.374063
ge	Hyperoxia	Normoxia	f	Berkelbacteria	0	0	-2.66667	0.374063
gh	Hyperoxia	Normoxia	f	Actinomarinaceae	0	0	0.333333	0.374063
gj	Hyperoxia	Normoxia	f	Crocinitomicaceaea	0	0	0.666667	0.374063
gk	Hyperoxia	Normoxia	f	Lactobacillaceae	0	0	5.33333	0.374063
gm	Hyperoxia	Normoxia	f	Ilumatobacteraceae	0	0	0.777778	0.374063
gn	Hyperoxia	Normoxia	f	Diplorickettsiaceae	0	0	0.444444	0.374063
go	Hyperoxia	Normoxia	f	Francisellaceae	0	0	-7.22222	0.374063
gq	Hyperoxia	Normoxia	f	Candidatus_Magasanikbacteria	0	0	0.222222	0.374063
gr	Hyperoxia	Normoxia	f	Gracilibacteria	0	0	0.222222	0.374063
gt	Hyperoxia	Normoxia	f	Cytophagaceae	0	0	6.11111	0.374063
gu	Hyperoxia	Normoxia	f	Nocardiaceae	0	0	0.333333	0.374063
gw	Hyperoxia	Normoxia	f	Rhodocyclaceae	0	0	0.666667	0.374063
gx	Hyperoxia	Normoxia	f	Microscillaceae	0	0	-0.555556	0.374063
ha	Hyperoxia	Normoxia	f	Magnetospiraceae	0	0	-1	0.374063
hb	Hyperoxia	Normoxia	f	Clade_III	0	0	-0.111111	0.374063
hc	Hyperoxia	Normoxia	f	Nodosilineaceae	0	0	-1.55556	0.374063
hd	Hyperoxia	Normoxia	f	Parvularculaceae	0	0	-0.777778	0.374063
hf	Hyperoxia	Normoxia	f	Kiloniellaceae	0	0	-0.666667	0.374063
hg	Hyperoxia	Normoxia	f	Methyloligellaceae	0	0	3.66667	0.374063
hh	Hyperoxia	Normoxia	f	Micrococcaceae	0	0	0.333333	0.374063
hn	Hyperoxia	Normoxia	f	Dojkabacteria	0	0	1.22222	0.374063
hu	Hyperoxia	Normoxia	g	Roseitalea	0	0	-23.3333	0.374063
hy	Hyperoxia	Normoxia	g	Candidatus_Peregrinibacteria	0	0	-0.111111	0.374063
ia	Hyperoxia	Normoxia	g	Anaerococcus	0	0	5.88889	0.374063
ib	Hyperoxia	Normoxia	g	Hydrogenophaga	0	0	1.66667	0.374063
ic	Hyperoxia	Normoxia	g	Balneola	0	0	-0.111111	0.374063
ie	Hyperoxia	Normoxia	g	Thalassotalea	0	0	-0.222222	0.374063
ig	Hyperoxia	Normoxia	g	Oleibacter	0	0	-0.555556	0.374063
ii	Hyperoxia	Normoxia	g	Phormidium_MBIC10003	0	0	-1.11111	0.374063
ij	Hyperoxia	Normoxia	g	Novosphingobium	0	0	0.444444	0.374063
im	Hyperoxia	Normoxia	g	Maricaulis	0	0	-0.444444	0.374063
ip	Hyperoxia	Normoxia	g	Microbacterium	0	0	-0.222222	0.374063
iq	Hyperoxia	Normoxia	g	Massilia	0	0	-1.44444	0.374063
is	Hyperoxia	Normoxia	g	Alcanivorax	0	0	-0.222222	0.374063
it	Hyperoxia	Normoxia	g	Wenyingzhuangia	0	0	-0.111111	0.374063
iu	Hyperoxia	Normoxia	g	Vicingus	0	0	-7.77778	0.374063
iv	Hyperoxia	Normoxia	g	Fulvivirga	0	0	-0.222222	0.374063
iz	Hyperoxia	Normoxia	g	Streptococcus	0	0	5.66667	0.374063
jb	Hyperoxia	Normoxia	g	Salinirepens	0	0	-3.88889	0.374063
jd	Hyperoxia	Normoxia	g	Nonlabens	0	0	1.88889	0.374063
jh	Hyperoxia	Normoxia	g	Nitratireductor	0	0	0.666667	0.374063
jl	Hyperoxia	Normoxia	g	Caenarcaniphilales	0	0	0.222222	0.374063
jm	Hyperoxia	Normoxia	g	Endozoicomonas	0	0	-0.111111	0.374063
jo	Hyperoxia	Normoxia	g	Lysinibacillus	0	0	1.22222	0.374063
js	Hyperoxia	Normoxia	g	Porphyrobacter	0	0	0.111111	0.374063
jt	Hyperoxia	Normoxia	g	Fabibacter	0	0	-2.77778	0.374063
jv	Hyperoxia	Normoxia	g	Phycisphaera	0	0	-0.555556	0.374063
jw	Hyperoxia	Normoxia	g	Halobacteriovorax	0	0	-1.66667	0.374063
jx	Hyperoxia	Normoxia	g	Allorhizobium-Neorhizobium-Pararhizobium-Rhizobium	0	0	0.777778	0.374063
kb	Hyperoxia	Normoxia	g	Oleiphilus	0	0	-1.55556	0.374063
kd	Hyperoxia	Normoxia	g	Pseudomonas	0	0	-0.555556	0.374063
kg	Hyperoxia	Normoxia	g	Croceibacter	0	0	0.777778	0.374063
kh	Hyperoxia	Normoxia	g	Berkelbacteria	0	0	-2.66667	0.374063
kn	Hyperoxia	Normoxia	g	Candidatus_Actinomarina	0	0	0.333333	0.374063
kp	Hyperoxia	Normoxia	g	Lactobacillus	0	0	5.33333	0.374063
kr	Hyperoxia	Normoxia	g	Ilumatobacter	0	0	0.777778	0.374063
ks	Hyperoxia	Normoxia	g	Fangia	0	0	-7.22222	0.374063
kt	Hyperoxia	Normoxia	g	Maritalea	0	0	3.11111	0.374063
ku	Hyperoxia	Normoxia	g	Turneriella	0	0	-6.44444	0.374063
kv	Hyperoxia	Normoxia	g	Candidatus_Magasanikbacteria	0	0	0.222222	0.374063
kw	Hyperoxia	Normoxia	g	Gracilibacteria	0	0	0.222222	0.374063
kz	Hyperoxia	Normoxia	g	Siphonobacter	0	0	6.11111	0.374063
lc	Hyperoxia	Normoxia	g	Rhodococcus	0	0	0.333333	0.374063
lf	Hyperoxia	Normoxia	g	Methyloversatilis	0	0	0.666667	0.374063
lg	Hyperoxia	Normoxia	g	Roseovarius	0	0	-0.777778	0.374063
lh	Hyperoxia	Normoxia	g	Leptospira	0	0	0.444444	0.374063
lj	Hyperoxia	Normoxia	g	Marinoscillum	0	0	-1.88889	0.374063
lk	Hyperoxia	Normoxia	g	Hyphomonas	0	0	0.888889	0.374063
ll	Hyperoxia	Normoxia	g	Halomonas	0	0	0.111111	0.374063
ln	Hyperoxia	Normoxia	g	Alteromonadacea	0	0	0.111111	0.374063
lo	Hyperoxia	Normoxia	g	Nodosilinea_PCC-7104	0	0	-1.55556	0.374063
lp	Hyperoxia	Normoxia	g	Noviherbaspirillum	0	0	0.666667	0.374063
ls	Hyperoxia	Normoxia	g	Parvularcula	0	0	-0.777778	0.374063
lv	Hyperoxia	Normoxia	g	Dokdonia	0	0	-3.66667	0.374063
lw	Hyperoxia	Normoxia	g	Micrococcus	0	0	0.333333	0.374063
mb	Hyperoxia	Normoxia	g	Ponticaulis	0	0	1.44444	0.374063
md	Hyperoxia	Normoxia	g	Euryhalocaulis	0	0	-0.333333	0.374063
mh	Hyperoxia	Normoxia	g	Persicirhabdus	0	0	0.555556	0.374063
mk	Hyperoxia	Normoxia	g	Dojkabacteria	0	0	1.22222	0.374063
aj	Hyperoxia	Normoxia	p	Bdellovibrionota	-1.74708	-938	-1790.22	0.386508
bb	Hyperoxia	Normoxia	c	Oligoflexia	-1.74708	-938	-1788.56	0.386508
dv	Hyperoxia	Normoxia	o	Oligoflexales	-1.74708	-938	-1774.78	0.386508
gz	Hyperoxia	Normoxia	f	Oligoflexales	-1.74708	-938	-1774.78	0.386508
lm	Hyperoxia	Normoxia	g	Pseudobacteriovorax	-1.74708	-938	-1774.78	0.386508
az	Hyperoxia	Normoxia	c	Planctomycetes	0	0	-3.55556	0.396053
cl	Hyperoxia	Normoxia	o	Pirellulales	0	0	-3.55556	0.396053
fc	Hyperoxia	Normoxia	f	Pirellulaceae	0	0	-3.55556	0.396053
hr	Hyperoxia	Normoxia	g	Winogradskyella	#NAME?	-5	-30.7778	0.431709
ca	Hyperoxia	Normoxia	o	Propionibacteriales	0	0	36.5556	0.434059
kc	Hyperoxia	Normoxia	g	Alteromonas	0	0	-6.11111	0.494194
be	Hyperoxia	Normoxia	c	Acidimicrobiia	0	0	3.66667	0.496769
db	Hyperoxia	Normoxia	o	Actinomarinales	0	0	2.88889	0.496769
dm	Hyperoxia	Normoxia	o	EC3	0	0	7.11111	0.496769
ho	Hyperoxia	Normoxia	g	SAR116_clade	0	0	-22.3333	0.496769
mc	Hyperoxia	Normoxia	g	Pelagibaca	0	0	-3.33333	0.496769
eg	Hyperoxia	Normoxia	f	Cryomorphaceae	Inf	65	17.3333	0.548116
bw	Hyperoxia	Normoxia	o	JGI_0000069-P22	0	0	-7.11111	0.58042
bd	Hyperoxia	Normoxia	c	Phycisphaerae	0	0	-0.222222	0.586672
cu	Hyperoxia	Normoxia	o	Rickettsiales	0	0	-13.2222	0.586672
cz	Hyperoxia	Normoxia	o	Phycisphaerales	0	0	-0.222222	0.586672
df	Hyperoxia	Normoxia	o	Pseudomonadales	0	0	0.555556	0.586672
ed	Hyperoxia	Normoxia	o	EV818SWSAP88	0	0	-0.888889	0.586672
fm	Hyperoxia	Normoxia	f	Burkholderiaceae	0	0	-5.11111	0.586672
fq	Hyperoxia	Normoxia	f	AB1	0	0	-13.2222	0.586672
fw	Hyperoxia	Normoxia	f	Phycisphaeraceae	0	0	-0.222222	0.586672
ja	Hyperoxia	Normoxia	g	Limnobacter	0	0	-5.11111	0.586672
bj	Hyperoxia	Normoxia	c	Sericytochromatia	0	0	1.55556	0.654602
di	Hyperoxia	Normoxia	o	Sericytochromatia	0	0	1.55556	0.654602
gf	Hyperoxia	Normoxia	f	Sericytochromatia	0	0	1.55556	0.654602
kl	Hyperoxia	Normoxia	g	Sericytochromatia	0	0	1.55556	0.654602
hs	Hyperoxia	Normoxia	g	Ruegeria	0.152003	2	-14.7778	0.655497
da	Hyperoxia	Normoxia	o	Xanthomonadales	0	0	-14.5556	0.662668
fy	Hyperoxia	Normoxia	f	Xanthomonadaceae	0	0	-14.5556	0.662668
jq	Hyperoxia	Normoxia	g	Stenotrophomonas	0	0	-14.5556	0.662668
ki	Hyperoxia	Normoxia	g	Kordia	Inf	6	-242.778	0.677564
bk	Hyperoxia	Normoxia	c	Spirochaetia	0	0	-6	0.683458
dj	Hyperoxia	Normoxia	o	Spirochaetales	0	0	-6	0.683458
eq	Hyperoxia	Normoxia	f	Propionibacteriaceae	0	0	4.44444	0.683458
gg	Hyperoxia	Normoxia	f	Spirochaetaceae	0	0	-6	0.683458
gl	Hyperoxia	Normoxia	f	Saprospiraceae	0	0	2.11111	0.683458
hz	Hyperoxia	Normoxia	g	Cutibacterium	0	0	4.44444	0.683458
jn	Hyperoxia	Normoxia	g	SM1A02	0	0	0.333333	0.683458
km	Hyperoxia	Normoxia	g	Spirochaeta_2	0	0	-6	0.683458
ky	Hyperoxia	Normoxia	g	Aquabacterium	0	0	2.88889	0.683458
la	Hyperoxia	Normoxia	g	Sphingorhabdus	0	0	-69.6667	0.683458
fp	Hyperoxia	Normoxia	f	Chitinophagaceae	0	0	-2.22222	0.68787
ap	Hyperoxia	Normoxia	c	Alphaproteobacteria	1.14081	717	-2078.22	0.73044
an	Hyperoxia	Normoxia	p	Verrucomicrobiota	0	0	-313.111	0.737432
bp	Hyperoxia	Normoxia	c	Verrucomicrobiae	0	0	-313.111	0.737432
by	Hyperoxia	Normoxia	o	Coxiellales	0	0	-4.11111	0.737432
dt	Hyperoxia	Normoxia	o	Verrucomicrobiales	0	0	-313.111	0.737432
eo	Hyperoxia	Normoxia	f	Coxiellaceae	0	0	-4.11111	0.737432
gs	Hyperoxia	Normoxia	f	Rubritaleaceae	0	0	-313.111	0.737432
hx	Hyperoxia	Normoxia	g	Coxiella	0	0	-4.11111	0.737432
kx	Hyperoxia	Normoxia	g	Rubritalea	0	0	-313.667	0.737432
le	Hyperoxia	Normoxia	g	Paracoccus	0	0	-8	0.763025
ea	Hyperoxia	Normoxia	o	Exiguobacterales	0	0	-4.66667	0.763178
hj	Hyperoxia	Normoxia	f	Exiguobacteraceae	0	0	-4.66667	0.763178
ly	Hyperoxia	Normoxia	g	Exiguobacterium	0	0	-4.66667	0.763178
ar	Hyperoxia	Normoxia	c	Gracilibacteria	0	0	-7	0.770911
em	Hyperoxia	Normoxia	f	Rhizobiaceae	3.35484	120	-361.889	0.788943
fg	Hyperoxia	Normoxia	f	Oxalobacteraceae	0	0	45.5556	0.833391
ay	Hyperoxia	Normoxia	c	Cyanobacteriia	0	0	-12.3333	0.855552
ac	Hyperoxia	Normoxia	p	Proteobacteria	-1.03675	-2160	-1729.33	0.863307
cn	Hyperoxia	Normoxia	o	Bacillales	#NAME?	-3	18.1111	0.887405
fe	Hyperoxia	Normoxia	f	Bacillaceae	#NAME?	-3	16.8889	0.887405
in	Hyperoxia	Normoxia	g	Bacillus	#NAME?	-3	16.8889	0.887405
al	Hyperoxia	Normoxia	p	Spirochaetota	0	0	-12	0.91102
ix	Hyperoxia	Normoxia	g	Cognatishimia	0	0	-0.444444	0.919944
eb	Hyperoxia	Normoxia	o	Parvibaculales	0	0	-40.2222	0.919998
hl	Hyperoxia	Normoxia	f	Parvibaculaceae	0	0	-40.2222	0.919998
ma	Hyperoxia	Normoxia	g	Pyruvatibacter	0	0	-40.2222	0.919998
jy	Hyperoxia	Normoxia	g	Limimaricola	#NAME?	-4	7.88889	0.922774
ct	Hyperoxia	Normoxia	o	Chitinophagales	#NAME?	-3	-0.111111	0.924798
co	Hyperoxia	Normoxia	o	Legionellales	-0.688056	-11	34.1111	0.928901
ff	Hyperoxia	Normoxia	f	Legionellaceae	-0.688056	-11	34.1111	0.928901
ik	Hyperoxia	Normoxia	g	Cohaesibacter	3.26849	95	-405.778	0.928901
io	Hyperoxia	Normoxia	g	Legionella	-0.688056	-11	34.1111	0.928901
br	Hyperoxia	Normoxia	o	Rhizobiales	0.800544	135	-1859.89	0.931427
ae	Hyperoxia	Normoxia	p	Patescibacteria	Inf	5	-7.66667	0.96311
ef	Hyperoxia	Normoxia	f	Devosiaceae	1.18442	14	-9.11111	0.964111
ab	Hyperoxia	Normoxia	k	Bacteria	0	0	0	1
ah	Hyperoxia	Normoxia	p	Cyanobacteria	Inf	5	-10.5556	1
ai	Hyperoxia	Normoxia	p	Planctomycetota	0	0	-3.77778	1
ao	Hyperoxia	Normoxia	p	SAR324_clade(Marine_group_B)	0	0	-0.777778	1
as	Hyperoxia	Normoxia	c	Gammaproteobacteria	-0.527738	-53	348.889	1
bn	Hyperoxia	Normoxia	c	Leptospirae	0	0	-6	1
ci	Hyperoxia	Normoxia	o	Micrococcales	0	0	-0.111111	1
cv	Hyperoxia	Normoxia	o	Reyranellales	0	0	-1.88889	1
cx	Hyperoxia	Normoxia	o	Synechococcales	0	0	-9.66667	1
dq	Hyperoxia	Normoxia	o	Leptospirales	0	0	-6	1
dz	Hyperoxia	Normoxia	o	Enterobacterales	0	0	-0.444444	1
es	Hyperoxia	Normoxia	f	Comamonadaceae	0	0	4.88889	1
fr	Hyperoxia	Normoxia	f	Reyranellaceae	0	0	-1.88889	1
ft	Hyperoxia	Normoxia	f	Cyanobiaceae	0	0	-9.66667	1
gp	Hyperoxia	Normoxia	f	Leptospiraceae	0	0	-6	1
gv	Hyperoxia	Normoxia	f	Shewanellaceae	0	0	-0.111111	1
hi	Hyperoxia	Normoxia	f	Erwiniaceae	0	0	-0.444444	1
iy	Hyperoxia	Normoxia	g	Blastopirellula	0	0	-5.55556	1
jg	Hyperoxia	Normoxia	g	Reyranella	0	0	-1.88889	1
jk	Hyperoxia	Normoxia	g	Synechococcus_CC9902	0	0	-9.66667	1
ju	Hyperoxia	Normoxia	g	Pseudoalteromonas	0	0	-7.33333	1
kk	Hyperoxia	Normoxia	g	Muricauda	0.263034	9	-51.2222	1
kq	Hyperoxia	Normoxia	g	Lewinella	0	0	2.77778	1
lb	Hyperoxia	Normoxia	g	Sediminibacterium	0	0	0.222222	1
ld	Hyperoxia	Normoxia	g	Ferrimonas	0	0	-0.111111	1
lu	Hyperoxia	Normoxia	g	Euzebyella	0	0	0.111111	1
lx	Hyperoxia	Normoxia	g	Pantoea	0	0	-0.444444	1
mf	Hyperoxia	Normoxia	g	Stappia	0	0	-7.11111	1
mj	Hyperoxia	Normoxia	g	Sphingopyxis	0	0	1	1

## Sheet: 36C
taxon_id	treatment_1	treatment_2	tax_name	regex_match	log2_median_ratio	median_diff	mean_diff	wilcox_p_value
gk	Hyperoxia	Normoxia	g	Winogradskyella	-100	-121	-241.889	0.00057874
gv	Hyperoxia	Normoxia	g	Muricauda	-7.06609	-266	-356.111	0.0359088
bp	Hyperoxia	Normoxia	o	Candidatus_Peregrinibacteria	0	0	-7.66667	0.0338606
by	Hyperoxia	Normoxia	o	Micrococcales	0	0	-18.2222	0.0338606
gl	Hyperoxia	Normoxia	g	Yangia	0	0	-21.2222	0.0338606
ac	Hyperoxia	Normoxia	p	Proteobacteria	0.985925	1919	1764.67	0.0399835
ap	Hyperoxia	Normoxia	c	Alphaproteobacteria	1.35607	1889	1667.22	0.0141917
ad	Hyperoxia	Normoxia	p	Bacteroidota	2.33848	9211	5548.44	0.0314685
aq	Hyperoxia	Normoxia	c	Bacteroidia	2.33848	9211	5548.44	0.0314685
bk	Hyperoxia	Normoxia	o	Flavobacteriales	2.36543	9253	5548.89	0.0399835
dp	Hyperoxia	Normoxia	f	Flavobacteriaceae	2.37521	9239	5670.11	0.0244344
gr	Hyperoxia	Normoxia	g	Tenacibaculum	2.93476	9471	6498.67	0.00275607
dl	Hyperoxia	Normoxia	f	Devosiaceae	4.02237	122	116.667	0.0079091
hm	Hyperoxia	Normoxia	g	Cohaesibacter	4.54844	112	503.444	0.0113732
ds	Hyperoxia	Normoxia	f	Rhizobiaceae	4.81762	136	518.778	0.0114161
bj	Hyperoxia	Normoxia	o	Rhizobiales	5.68706	2526	2450.67	4.11353e-05
gj	Hyperoxia	Normoxia	g	Labrenzia	5.76072	1703	1762	4.11353e-05
do	Hyperoxia	Normoxia	f	Stappiaceae	5.84627	1809	1802.56	4.11353e-05
gn	Hyperoxia	Normoxia	g	Ruegeria	100	67	142.333	0.00096194
fg	Hyperoxia	Normoxia	f	Beijerinckiaceae	100	1	7	0.0138713
ir	Hyperoxia	Normoxia	g	Methylobacterium-Methylorubrum	100	1	7	0.0138713
ag	Hyperoxia	Normoxia	p	Firmicutes	-2.25619	-9904	-7341.89	0.0770053
au	Hyperoxia	Normoxia	c	Bacilli	-2.25619	-9904	-7341.89	0.0770053
bd	Hyperoxia	Normoxia	c	Acidimicrobiia	0	0	-11.8889	0.077243
cu	Hyperoxia	Normoxia	o	Kordiimonadales	0	0	15.2222	0.077243
ed	Hyperoxia	Normoxia	f	Microbacteriaceae	0	0	-1.33333	0.077243
eg	Hyperoxia	Normoxia	f	Phormidesmiaceae	0	0	-50.2222	0.077243
fb	Hyperoxia	Normoxia	f	Babeliales	0	0	-1.33333	0.077243
fh	Hyperoxia	Normoxia	f	Kordiimonadaceae	0	0	15.2222	0.077243
hi	Hyperoxia	Normoxia	g	Phormidium_MBIC10003	0	0	-50.2222	0.077243
ik	Hyperoxia	Normoxia	g	Babeliales	0	0	-1.33333	0.077243
is	Hyperoxia	Normoxia	g	Flavobacterium	0	0	-32	0.077243
it	Hyperoxia	Normoxia	g	Kordiimonas	0	0	15.2222	0.077243
kf	Hyperoxia	Normoxia	g	Stappia	0	0	18.5556	0.077243
bz	Hyperoxia	Normoxia	o	Bacillales	0	0	-5	0.0936832
ef	Hyperoxia	Normoxia	f	Bacillaceae	0	0	-5	0.0936832
hh	Hyperoxia	Normoxia	g	Bacillus	0	0	-5	0.0936832
in	Hyperoxia	Normoxia	g	Devosia	Inf	16	23	0.130974
hd	Hyperoxia	Normoxia	g	Legionella	-4.08746	-176	-75.1111	0.131313
kg	Hyperoxia	Normoxia	g	Meridianimaribacter	0	0	-50.3333	0.146286
go	Hyperoxia	Normoxia	g	Erythrobacter	#NAME?	-3	-28.3333	0.15969
aj	Hyperoxia	Normoxia	p	Myxococcota	0	0	-4	0.169327
ao	Hyperoxia	Normoxia	p	Desulfobacterota	0	0	1.11111	0.169327
ax	Hyperoxia	Normoxia	c	Polyangia	0	0	-4	0.169327
bb	Hyperoxia	Normoxia	c	Berkelbacteria	0	0	-6.44444	0.169327
bh	Hyperoxia	Normoxia	c	Desulfuromonadia	0	0	1.11111	0.169327
bs	Hyperoxia	Normoxia	o	Staphylococcales	0	0	-6.55556	0.169327
cf	Hyperoxia	Normoxia	o	Polyangiales	0	0	-4	0.169327
ch	Hyperoxia	Normoxia	o	Sphingobacteriales	0	0	2.77778	0.169327
cs	Hyperoxia	Normoxia	o	Milano-WF1B-44	0	0	-4.22222	0.169327
cv	Hyperoxia	Normoxia	o	Berkelbacteria	0	0	-6.44444	0.169327
db	Hyperoxia	Normoxia	o	Microtrichales	0	0	-11	0.169327
di	Hyperoxia	Normoxia	o	Bradymonadales	0	0	1.11111	0.169327
du	Hyperoxia	Normoxia	f	Candidatus_Peregrinibacteria	0	0	-6.11111	0.169327
dx	Hyperoxia	Normoxia	f	Staphylococcaceae	0	0	-6.55556	0.169327
ee	Hyperoxia	Normoxia	f	Micrococcaceae	0	0	-16.8889	0.169327
ei	Hyperoxia	Normoxia	f	Nocardioidaceae	0	0	1.11111	0.169327
el	Hyperoxia	Normoxia	f	Sandaracinaceae	0	0	-4	0.169327
em	Hyperoxia	Normoxia	f	Streptococcaceae	0	0	5.77778	0.169327
eo	Hyperoxia	Normoxia	f	NS11-12_marine_group	0	0	2.77778	0.169327
ey	Hyperoxia	Normoxia	f	Comamonadaceae	0	0	3	0.169327
fk	Hyperoxia	Normoxia	f	Berkelbacteria	0	0	-6.44444	0.169327
fu	Hyperoxia	Normoxia	f	Ilumatobacteraceae	0	0	-11	0.169327
ge	Hyperoxia	Normoxia	f	Bradymonadales	0	0	1.11111	0.169327
gu	Hyperoxia	Normoxia	g	Candidatus_Peregrinibacteria	0	0	-6.11111	0.169327
gz	Hyperoxia	Normoxia	g	Staphylococcus	0	0	-6.55556	0.169327
hp	Hyperoxia	Normoxia	g	Nocardioides	0	0	1.11111	0.169327
hr	Hyperoxia	Normoxia	g	Sandaracinus	0	0	-4	0.169327
hs	Hyperoxia	Normoxia	g	Streptococcus	0	0	5.77778	0.169327
ic	Hyperoxia	Normoxia	g	NS10_marine_group	0	0	4.33333	0.169327
iw	Hyperoxia	Normoxia	g	Altererythrobacter	0	0	-9.22222	0.169327
ix	Hyperoxia	Normoxia	g	Berkelbacteria	0	0	-6.44444	0.169327
jc	Hyperoxia	Normoxia	g	Gilvibacter	0	0	-19.5556	0.169327
jg	Hyperoxia	Normoxia	g	Ilumatobacter	0	0	-11	0.169327
ju	Hyperoxia	Normoxia	g	Rhodobacter	0	0	-16.4444	0.169327
jx	Hyperoxia	Normoxia	g	Micrococcus	0	0	-16.3333	0.169327
jz	Hyperoxia	Normoxia	g	Bradymonadales	0	0	1.11111	0.169327
kc	Hyperoxia	Normoxia	g	Ponticaulis	0	0	-1.88889	0.169327
ke	Hyperoxia	Normoxia	g	Polaribacter	0	0	-11.5556	0.169327
bn	Hyperoxia	Normoxia	o	Sphingomonadales	-3.64386	-23	-75.4444	0.172395
dr	Hyperoxia	Normoxia	f	Sphingomonadaceae	-3.64386	-23	-75.4444	0.172395
bl	Hyperoxia	Normoxia	o	Rhodobacterales	-0.841111	-277	-539.667	0.190251
dn	Hyperoxia	Normoxia	f	Rhodobacteraceae	-0.841111	-277	-539.667	0.190251
cw	Hyperoxia	Normoxia	o	Micavibrionales	0	0	-54	0.206569
fl	Hyperoxia	Normoxia	f	Micavibrionaceae	0	0	-54	0.206569
af	Hyperoxia	Normoxia	p	Actinobacteriota	#NAME?	-5	-32.3333	0.207305
ca	Hyperoxia	Normoxia	o	Phormidesmiales	0	0	-235.222	0.225353
da	Hyperoxia	Normoxia	o	Exiguobacterales	0	0	-8.22222	0.225353
fs	Hyperoxia	Normoxia	f	Exiguobacteraceae	0	0	-8.22222	0.225353
gp	Hyperoxia	Normoxia	g	Roseitalea	0	0	15.4444	0.225353
hq	Hyperoxia	Normoxia	g	Cognatishimia	0	0	-11.4444	0.225353
je	Hyperoxia	Normoxia	g	Exiguobacterium	0	0	-8.22222	0.225353
ai	Hyperoxia	Normoxia	p	Cyanobacteria	-5.46411	-302	-923.667	0.246065
bv	Hyperoxia	Normoxia	o	Legionellales	-4.23406	-196	129.222	0.249773
ea	Hyperoxia	Normoxia	f	Legionellaceae	-4.23406	-196	129.222	0.249773
aw	Hyperoxia	Normoxia	c	Cyanobacteriia	0	0	-240	0.269435
bm	Hyperoxia	Normoxia	o	Caulobacterales	0	0	-10.5556	0.275196
dq	Hyperoxia	Normoxia	f	Hyphomonadaceae	0	0	-10.5556	0.275196
hk	Hyperoxia	Normoxia	g	Oceanicaulis	0	0	-5.88889	0.275196
ho	Hyperoxia	Normoxia	g	Vicingus	Inf	3	6.44444	0.315202
iy	Hyperoxia	Normoxia	g	Kordia	#NAME?	-19	-44.7778	0.331958
eh	Hyperoxia	Normoxia	f	Pseudoalteromonadaceae	0	0	1.22222	0.33208
fj	Hyperoxia	Normoxia	f	Terasakiellaceae	Inf	32	-78.2222	0.345495
dj	Hyperoxia	Normoxia	o	Parvibaculales	0	0	-1.22222	0.362718
gf	Hyperoxia	Normoxia	f	Parvibaculaceae	0	0	-1.22222	0.362718
ka	Hyperoxia	Normoxia	g	Pyruvatibacter	0	0	-1.22222	0.362718
cg	Hyperoxia	Normoxia	o	Coxiellales	0	0	-4.88889	0.371317
en	Hyperoxia	Normoxia	f	Coxiellaceae	0	0	-4.88889	0.371317
ht	Hyperoxia	Normoxia	g	Coxiella	0	0	-4.88889	0.371317
am	Hyperoxia	Normoxia	p	Verrucomicrobiota	0	0	-0.111111	0.374063
an	Hyperoxia	Normoxia	p	Spirochaetota	0	0	0.222222	0.374063
ay	Hyperoxia	Normoxia	c	Phycisphaerae	0	0	-1	0.374063
be	Hyperoxia	Normoxia	c	Verrucomicrobiae	0	0	-0.111111	0.374063
bf	Hyperoxia	Normoxia	c	Leptospirae	0	0	0.222222	0.374063
bg	Hyperoxia	Normoxia	c	Vampirivibrionia	0	0	-6.66667	0.374063
bi	Hyperoxia	Normoxia	c	Planctomycetes	0	0	0.666667	0.374063
bu	Hyperoxia	Normoxia	o	Corynebacteriales	0	0	-0.222222	0.374063
cm	Hyperoxia	Normoxia	o	Phycisphaerales	0	0	-1	0.374063
cz	Hyperoxia	Normoxia	o	Actinomarinales	0	0	-0.888889	0.374063
dc	Hyperoxia	Normoxia	o	AT-s3-44	0	0	4.33333	0.374063
de	Hyperoxia	Normoxia	o	Verrucomicrobiales	0	0	-0.111111	0.374063
df	Hyperoxia	Normoxia	o	Pseudomonadales	0	0	0.111111	0.374063
dg	Hyperoxia	Normoxia	o	Leptospirales	0	0	0.222222	0.374063
dh	Hyperoxia	Normoxia	o	Vampirovibrionales	0	0	-6.66667	0.374063
dk	Hyperoxia	Normoxia	o	Pirellulales	0	0	0.666667	0.374063
dt	Hyperoxia	Normoxia	f	Flavobacteriacea	0	0	-1.22222	0.374063
dv	Hyperoxia	Normoxia	f	Propionibacteriaceae	0	0	-1.77778	0.374063
dw	Hyperoxia	Normoxia	f	Saccharospirillaceae	0	0	-0.888889	0.374063
dz	Hyperoxia	Normoxia	f	Nocardiaceae	0	0	-0.222222	0.374063
ec	Hyperoxia	Normoxia	f	Lactobacillaceae	0	0	-0.111111	0.374063
ev	Hyperoxia	Normoxia	f	Endozoicomonadaceae	0	0	0.333333	0.374063
ew	Hyperoxia	Normoxia	f	Phycisphaeraceae	0	0	-1	0.374063
fe	Hyperoxia	Normoxia	f	Thalassospiraceae	0	0	-0.222222	0.374063
ff	Hyperoxia	Normoxia	f	Idiomarinaceae	0	0	-1.11111	0.374063
fm	Hyperoxia	Normoxia	f	Oleiphilaceae	0	0	-2.77778	0.374063
fn	Hyperoxia	Normoxia	f	Halieaceae	0	0	0.111111	0.374063
fp	Hyperoxia	Normoxia	f	Actinomarinaceae	0	0	-0.888889	0.374063
fq	Hyperoxia	Normoxia	f	UBA12409	0	0	0.111111	0.374063
fr	Hyperoxia	Normoxia	f	Crocinitomicaceaea	0	0	2.22222	0.374063
fw	Hyperoxia	Normoxia	f	Spongiibacteraceae	0	0	-0.222222	0.374063
fx	Hyperoxia	Normoxia	f	Rubritaleaceae	0	0	-0.111111	0.374063
fy	Hyperoxia	Normoxia	f	NS9_marine_group	0	0	0.555556	0.374063
fz	Hyperoxia	Normoxia	f	Rhodocyclaceae	0	0	-0.444444	0.374063
ga	Hyperoxia	Normoxia	f	Pseudomonadaceae	0	0	0.111111	0.374063
gb	Hyperoxia	Normoxia	f	Leptospiraceae	0	0	0.222222	0.374063
gd	Hyperoxia	Normoxia	f	Vampirovibrionales	0	0	-6.66667	0.374063
gg	Hyperoxia	Normoxia	f	Marinobacteraceae	0	0	-0.555556	0.374063
gh	Hyperoxia	Normoxia	f	Pirellulaceae	0	0	0.666667	0.374063
gm	Hyperoxia	Normoxia	g	Mesoflavibacter	0	0	-6.88889	0.374063
gt	Hyperoxia	Normoxia	g	Salegentibacter	0	0	-2.22222	0.374063
gw	Hyperoxia	Normoxia	g	Cutibacterium	0	0	-1.77778	0.374063
gx	Hyperoxia	Normoxia	g	Henriciella	0	0	-0.444444	0.374063
gy	Hyperoxia	Normoxia	g	Thalassolituus	0	0	-0.888889	0.374063
hb	Hyperoxia	Normoxia	g	Gordonia	0	0	-0.222222	0.374063
hc	Hyperoxia	Normoxia	g	Sphingomonas	0	0	-3.88889	0.374063
hf	Hyperoxia	Normoxia	g	Lactobacillus	0	0	-0.111111	0.374063
hg	Hyperoxia	Normoxia	g	Arthrobacter	0	0	-0.555556	0.374063
hj	Hyperoxia	Normoxia	g	HIMB11	0	0	-0.666667	0.374063
hn	Hyperoxia	Normoxia	g	Algicola	0	0	-0.777778	0.374063
hx	Hyperoxia	Normoxia	g	Pseudofulvibacter	0	0	-4.88889	0.374063
hz	Hyperoxia	Normoxia	g	Marixanthomonas	0	0	-2.11111	0.374063
ie	Hyperoxia	Normoxia	g	Endozoicomonas	0	0	0.333333	0.374063
if	Hyperoxia	Normoxia	g	SM1A02	0	0	-1	0.374063
ih	Hyperoxia	Normoxia	g	Comamonas	0	0	1.44444	0.374063
ii	Hyperoxia	Normoxia	g	Fabibacter	0	0	0.666667	0.374063
ij	Hyperoxia	Normoxia	g	Marinicella	0	0	-2.88889	0.374063
im	Hyperoxia	Normoxia	g	Limimaricola	0	0	-0.444444	0.374063
ip	Hyperoxia	Normoxia	g	Thalassospira	0	0	-0.222222	0.374063
iq	Hyperoxia	Normoxia	g	Idiomarina	0	0	-1.11111	0.374063
iu	Hyperoxia	Normoxia	g	Edaphobaculum	0	0	2	0.374063
iz	Hyperoxia	Normoxia	g	Oleiphilus	0	0	-2.77778	0.374063
ja	Hyperoxia	Normoxia	g	OM60(NOR5)_clade	0	0	0.111111	0.374063
jd	Hyperoxia	Normoxia	g	Candidatus_Actinomarina	0	0	-0.888889	0.374063
jh	Hyperoxia	Normoxia	g	BD1-7_clade	0	0	-0.222222	0.374063
ji	Hyperoxia	Normoxia	g	Rubritalea	0	0	-0.111111	0.374063
jj	Hyperoxia	Normoxia	g	Aquabacterium	0	0	1.55556	0.374063
jm	Hyperoxia	Normoxia	g	Methyloversatilis	0	0	-0.444444	0.374063
jn	Hyperoxia	Normoxia	g	Hyphomicrobium	0	0	-3.44444	0.374063
jo	Hyperoxia	Normoxia	g	Pseudomonas	0	0	0.111111	0.374063
jp	Hyperoxia	Normoxia	g	Leptospira	0	0	0.222222	0.374063
jq	Hyperoxia	Normoxia	g	Filomicrobium	0	0	3.55556	0.374063
jr	Hyperoxia	Normoxia	g	Hyphomonas	0	0	-0.333333	0.374063
jt	Hyperoxia	Normoxia	g	Agromyces	0	0	-0.111111	0.374063
jv	Hyperoxia	Normoxia	g	Aureisphaera	0	0	-2.88889	0.374063
jw	Hyperoxia	Normoxia	g	Vampirovibrionales	0	0	-6.66667	0.374063
jy	Hyperoxia	Normoxia	g	Candidatus_Berkiella	0	0	0.555556	0.374063
kb	Hyperoxia	Normoxia	g	Marinobacter	0	0	-0.555556	0.374063
kh	Hyperoxia	Normoxia	g	Sphingopyxis	0	0	-16.5556	0.374063
at	Hyperoxia	Normoxia	c	Gammaproteobacteria	-2.91966	-197	93.7778	0.376978
hy	Hyperoxia	Normoxia	g	Nonlabens	0	0	4.66667	0.396053
ah	Hyperoxia	Normoxia	p	Bdellovibrionota	0.807355	3	1001.78	0.399834
as	Hyperoxia	Normoxia	c	Actinobacteria	0	0	-20.4444	0.42169
ct	Hyperoxia	Normoxia	o	Rhodospirillales	Inf	32	-78.4444	0.43223
ck	Hyperoxia	Normoxia	o	Reyranellales	0	0	-3.66667	0.494194
et	Hyperoxia	Normoxia	f	Reyranellaceae	0	0	-3.66667	0.494194
ib	Hyperoxia	Normoxia	g	Reyranella	0	0	-3.66667	0.494194
br	Hyperoxia	Normoxia	o	Oceanospirillales	0	0	-3.33333	0.496769
bx	Hyperoxia	Normoxia	o	Lactobacillales	0	0	5.66667	0.496769
gc	Hyperoxia	Normoxia	f	Nodosilineaceae	0	0	-185	0.496769
js	Hyperoxia	Normoxia	g	Nodosilinea_PCC-7104	0	0	-185	0.496769
cb	Hyperoxia	Normoxia	o	Burkholderiales	#NAME?	-4	-8	0.571381
cl	Hyperoxia	Normoxia	o	Synechococcales	0	0	-4.77778	0.586672
er	Hyperoxia	Normoxia	f	Chitinophagaceae	0	0	2.22222	0.586672
eu	Hyperoxia	Normoxia	f	Cyanobiaceae	0	0	-4.77778	0.586672
fd	Hyperoxia	Normoxia	f	Alteromonadaceae	0	0	-0.444444	0.586672
id	Hyperoxia	Normoxia	g	Synechococcus_CC9902	0	0	-5.22222	0.586672
io	Hyperoxia	Normoxia	g	Alteromonas	0	0	-0.444444	0.586672
jf	Hyperoxia	Normoxia	g	Lewinella	0	0	-3.22222	0.586672
kd	Hyperoxia	Normoxia	g	Pelagibaca	0	0	2.66667	0.586672
av	Hyperoxia	Normoxia	c	Oligoflexia	0.321928	1	1001	0.594908
bt	Hyperoxia	Normoxia	o	Oligoflexales	0.321928	1	1001	0.594908
dy	Hyperoxia	Normoxia	f	Oligoflexales	0.321928	1	1001	0.594908
ha	Hyperoxia	Normoxia	g	Pseudobacteriovorax	0.321928	1	1001	0.594908
al	Hyperoxia	Normoxia	p	Dependentiae	0	0	-0.555556	0.614753
az	Hyperoxia	Normoxia	c	Babeliae	0	0	-0.555556	0.614753
cq	Hyperoxia	Normoxia	o	Babeliales	0	0	-0.555556	0.614753
cj	Hyperoxia	Normoxia	o	Rickettsiales	1.06413	12	-16.5556	0.620453
es	Hyperoxia	Normoxia	f	AB1	1.06413	12	-16.5556	0.620453
dm	Hyperoxia	Normoxia	f	Cryomorphaceae	Inf	43	-123.556	0.620828
bc	Hyperoxia	Normoxia	c	Sericytochromatia	1	2	-677	0.644089
cy	Hyperoxia	Normoxia	o	Sericytochromatia	1	2	-677	0.644089
fo	Hyperoxia	Normoxia	f	Sericytochromatia	1	2	-677	0.644089
jb	Hyperoxia	Normoxia	g	Sericytochromatia	1	2	-677	0.644089
jl	Hyperoxia	Normoxia	g	Paracoccus	0.530515	4	0.777778	0.649217
bq	Hyperoxia	Normoxia	o	Propionibacteriales	0	0	-0.666667	0.683458
gq	Hyperoxia	Normoxia	g	Euzebyella	0	0	-135	0.683458
ci	Hyperoxia	Normoxia	o	Chitinophagales	0	0	0.777778	0.725016
cn	Hyperoxia	Normoxia	o	Xanthomonadales	0	0	-7.22222	0.855691
ep	Hyperoxia	Normoxia	f	Burkholderiaceae	0	0	-7.33333	0.855691
ex	Hyperoxia	Normoxia	f	Xanthomonadaceae	0	0	-7.22222	0.855691
hu	Hyperoxia	Normoxia	g	Limnobacter	0	0	-7.33333	0.855691
ig	Hyperoxia	Normoxia	g	Stenotrophomonas	0	0	-7.22222	0.855691
cc	Hyperoxia	Normoxia	o	Alteromonadales	0	0	-0.888889	0.87455
ek	Hyperoxia	Normoxia	f	Oxalobacteraceae	0	0	-2.88889	0.903406
gs	Hyperoxia	Normoxia	g	NS5_marine_group	Inf	8	-45.1111	0.922774
ae	Hyperoxia	Normoxia	p	Patescibacteria	Inf	10	-9.33333	0.924842
bw	Hyperoxia	Normoxia	o	Vibrionales	0.321928	1	-1.77778	0.929087
eb	Hyperoxia	Normoxia	f	Vibrionaceae	0.321928	1	-1.77778	0.929087
he	Hyperoxia	Normoxia	g	Vibrio	0.321928	1	-1.77778	0.929087
bo	Hyperoxia	Normoxia	o	JGI_0000069-P22	Inf	10	4.77778	0.962357
ab	Hyperoxia	Normoxia	k	Bacteria	0	0	0	1
ak	Hyperoxia	Normoxia	p	Planctomycetota	0	0	-0.333333	1
ar	Hyperoxia	Normoxia	c	Gracilibacteria	Inf	10	-2.88889	1
ba	Hyperoxia	Normoxia	c	Bdellovibrionia	0	0	0.777778	1
cd	Hyperoxia	Normoxia	o	Puniceispirillales	0	0	4.33333	1
ce	Hyperoxia	Normoxia	o	EC3	0	0	-2.11111	1
co	Hyperoxia	Normoxia	o	Cytophagales	0	0	-4	1
cp	Hyperoxia	Normoxia	o	Gammaproteobacteria_Incertae_Sedis	0	0	-3.11111	1
cr	Hyperoxia	Normoxia	o	Bacteriovoracales	0	0	0.777778	1
cx	Hyperoxia	Normoxia	o	Cellvibrionales	0	0	-0.111111	1
dd	Hyperoxia	Normoxia	o	Diplorickettsiales	0	0	0.666667	1
ej	Hyperoxia	Normoxia	f	SAR116_clade	0	0	4.33333	1
eq	Hyperoxia	Normoxia	f	Crocinitomicaceae	0	0	0.777778	1
ez	Hyperoxia	Normoxia	f	Cyclobacteriaceae	0	0	-4	1
fa	Hyperoxia	Normoxia	f	Unknown_Family	0	0	-3.11111	1
fc	Hyperoxia	Normoxia	f	Bacteriovoracaceae	0	0	0.777778	1
fi	Hyperoxia	Normoxia	f	Hyphomicrobiaceae	0	0	-2	1
ft	Hyperoxia	Normoxia	f	Saprospiraceae	0	0	-1.44444	1
fv	Hyperoxia	Normoxia	f	Diplorickettsiaceae	0	0	0.666667	1
gi	Hyperoxia	Normoxia	g	Shimia	-1.45792	-152	-159.111	1
hl	Hyperoxia	Normoxia	g	Maricaulis	0	0	1.33333	1
hv	Hyperoxia	Normoxia	g	Salinirepens	0	0	0.777778	1
hw	Hyperoxia	Normoxia	g	Puia	0	0	0.222222	1
ia	Hyperoxia	Normoxia	g	Owenweeksia	0	0	-4.66667	1
il	Hyperoxia	Normoxia	g	Halobacteriovorax	0	0	0.777778	1
iv	Hyperoxia	Normoxia	g	Croceibacter	0	0	-2.66667	1
jk	Hyperoxia	Normoxia	g	Sphingorhabdus	0	0	-15.1111	1

## Sheet: 38C
taxon_id	treatment_1	treatment_2	tax_rank	tax_name	log2_median_ratio	median_diff	mean_diff	wilcox_p_value
il	Hyperoxia	Normoxia	g	Devosia	-100	-6	-13.2778	0.0322694
ia	Hyperoxia	Normoxia	g	Oceanicaulis	0	0	3.55556	0.0450711
iv	Hyperoxia	Normoxia	g	Salegentibacter	0	0	18.3333	0.0450711
au	Hyperoxia	Normoxia	c	Gammaproteobacteria	0.855183	72	427.542	0.0384423
gk	Hyperoxia	Normoxia	g	Shimia	1.84951	138	677	0.00370218
bs	Hyperoxia	Normoxia	o	Rhodobacterales	1.92785	2472.5	3423.89	0.0464007
dx	Hyperoxia	Normoxia	f	Rhodobacteraceae	1.92785	2472.5	3423.89	0.0464007
jg	Hyperoxia	Normoxia	g	Paracoccus	2.65208	185	154.653	0.0236557
gn	Hyperoxia	Normoxia	g	Ruegeria	3.21057	433.5	526.153	0.00810146
hb	Hyperoxia	Normoxia	g	Vibrio	3.51457	36.5	89.5278	0.005944
ca	Hyperoxia	Normoxia	o	Vibrionales	3.51457	36.5	89.8472	0.00597482
ej	Hyperoxia	Normoxia	f	Vibrionaceae	3.51457	36.5	89.8472	0.00597482
ad	Hyperoxia	Normoxia	p	Bacteroidota	3.86184	6282	7594.75	8.23e-05
at	Hyperoxia	Normoxia	c	Bacteroidia	3.88141	6278	7592.5	8.23e-05
bq	Hyperoxia	Normoxia	o	Flavobacteriales	3.89397	6274.5	6084.17	8.23e-05
dy	Hyperoxia	Normoxia	f	Flavobacteriaceae	3.92666	6109	6054.69	8.23e-05
gx	Hyperoxia	Normoxia	g	Tenacibaculum	4.13768	1585.5	1260.78	0.0160797
bu	Hyperoxia	Normoxia	o	Sphingomonadales	5.078	147.5	130.153	0.00331764
ea	Hyperoxia	Normoxia	f	Sphingomonadaceae	5.078	147.5	130.153	0.00331764
gl	Hyperoxia	Normoxia	g	Winogradskyella	5.88827	2271	1988.71	0.000987248
go	Hyperoxia	Normoxia	g	Erythrobacter	7.83289	113.5	100.306	0.00314688
bt	Hyperoxia	Normoxia	o	Caulobacterales	100	30	43.3889	0.000475965
hj	Hyperoxia	Normoxia	g	Flavobacteriaceae	100	9	13.2222	0.00103072
br	Hyperoxia	Normoxia	o	Chitinophagales	100	90	1592.31	0.00109935
dw	Hyperoxia	Normoxia	f	Saprospiraceae	100	90	1592.31	0.00109935
fg	Hyperoxia	Normoxia	f	Parvularculaceae	100	30	37	0.00305037
ii	Hyperoxia	Normoxia	g	Parvularcula	100	30	37	0.00305037
kb	Hyperoxia	Normoxia	g	Pelagibaca	100	25	31.4167	0.00608624
al	Hyperoxia	Normoxia	p	Desulfobacterota	100	11	12.8889	0.00809336
bc	Hyperoxia	Normoxia	c	Desulfuromonadia	100	11	12.8889	0.00809336
cu	Hyperoxia	Normoxia	o	Bradymonadales	100	11	12.8889	0.00809336
ff	Hyperoxia	Normoxia	f	Bradymonadales	100	11	12.8889	0.00809336
ig	Hyperoxia	Normoxia	g	Bradymonadales	100	11	12.8889	0.00809336
hy	Hyperoxia	Normoxia	g	SM1A02	100	2	12.2222	0.0198988
hq	Hyperoxia	Normoxia	g	Nonlabens	100	182	2108.6	0.0289388
ho	Hyperoxia	Normoxia	g	Lewinella	100	6	1527.6	0.0578367
ak	Hyperoxia	Normoxia	p	SAR324_clade(Marine_group_B)	0	0	-1.5	0.0596563
cd	Hyperoxia	Normoxia	o	Sphingobacteriales	0	0	-96.25	0.0600107
ce	Hyperoxia	Normoxia	o	Bacillales	0	0	-1.25	0.0600107
hg	Hyperoxia	Normoxia	g	Fulvivirga	0	0	-1.875	0.0600107
av	Hyperoxia	Normoxia	c	Cyanobacteriia	-100	-4	-4.11111	0.0629791
gv	Hyperoxia	Normoxia	g	Muricauda	1.53964	92.5	542.653	0.074455
ch	Hyperoxia	Normoxia	o	Propionibacteriales	100	5	12.3472	0.0806068
cq	Hyperoxia	Normoxia	o	Phycisphaerales	100	2	11.4722	0.0809525
ez	Hyperoxia	Normoxia	f	Phycisphaeraceae	Inf	2	11.4722	0.0809525
bg	Hyperoxia	Normoxia	c	Polyangia	0	0	4.33333	0.0961705
cy	Hyperoxia	Normoxia	o	Rhodospirillales	0	0	20.1111	0.0961705
dd	Hyperoxia	Normoxia	o	Polyangiales	0	0	4.33333	0.0961705
fi	Hyperoxia	Normoxia	f	Alteromonadaceae	0	0	3.88889	0.0961705
fm	Hyperoxia	Normoxia	f	Terasakiellaceae	0	0	20.1111	0.0961705
fu	Hyperoxia	Normoxia	f	Sandaracinaceae	0	0	4.33333	0.0961705
hp	Hyperoxia	Normoxia	g	Pseudofulvibacter	0	0	3.77778	0.0961705
im	Hyperoxia	Normoxia	g	Alteromonas	0	0	3.66667	0.0961705
it	Hyperoxia	Normoxia	g	Croceibacter	0	0	1.33333	0.0961705
ja	Hyperoxia	Normoxia	g	Sandaracinus	0	0	4.33333	0.0961705
jh	Hyperoxia	Normoxia	g	Mesonia	0	0	7.44444	0.0961705
jw	Hyperoxia	Normoxia	g	Marivita	0	0	4.11111	0.0961705
ik	Hyperoxia	Normoxia	g	Mesoflavibacter	0	0	14.3472	0.120622
eo	Hyperoxia	Normoxia	f	Nocardioidaceae	100	5	11.6806	0.127002
hh	Hyperoxia	Normoxia	g	Nocardioides	Inf	5	11.6806	0.127002
cm	Hyperoxia	Normoxia	o	Rickettsiales	3.04439	29	42.3333	0.130773
ev	Hyperoxia	Normoxia	f	AB1	3.04439	29	42.3333	0.130773
cc	Hyperoxia	Normoxia	o	Burkholderiales	0	0	1.97222	0.135207
cp	Hyperoxia	Normoxia	o	Synechococcales	-100	-2	-3.48611	0.135576
ey	Hyperoxia	Normoxia	f	Cyanobiaceae	#NAME?	-2	-3.48611	0.135576
bm	Hyperoxia	Normoxia	c	Thermoanaerobaculia	0	0	-1.25	0.143433
dr	Hyperoxia	Normoxia	o	Thermoanaerobaculales	0	0	-1.25	0.143433
gi	Hyperoxia	Normoxia	f	Thermoanaerobaculaceae	0	0	-1.25	0.143433
kg	Hyperoxia	Normoxia	g	Subgroup_10	0	0	-1.25	0.143433
aq	Hyperoxia	Normoxia	p	Acidobacteriota	0	0	-1.875	0.144217
bw	Hyperoxia	Normoxia	o	Cyanobacteriales	0	0	-0.625	0.144217
by	Hyperoxia	Normoxia	o	Micrococcales	0	0	-1.5	0.144217
dq	Hyperoxia	Normoxia	o	Thalassobaculales	0	0	-2.125	0.144217
ef	Hyperoxia	Normoxia	f	Xenococcaceae	0	0	-0.625	0.144217
eh	Hyperoxia	Normoxia	f	Microbacteriaceae	0	0	-1.5	0.144217
el	Hyperoxia	Normoxia	f	Bacillaceae	0	0	-0.625	0.144217
eu	Hyperoxia	Normoxia	f	NS11-12_marine_group	0	0	-94.25	0.144217
fq	Hyperoxia	Normoxia	f	UBA12409	0	0	-0.625	0.144217
gw	Hyperoxia	Normoxia	g	Xenococcus_PCC-7305	0	0	-0.625	0.144217
hd	Hyperoxia	Normoxia	g	Bacillus	0	0	-0.625	0.144217
is	Hyperoxia	Normoxia	g	NS4_marine_group	0	0	-2.25	0.144217
ah	Hyperoxia	Normoxia	p	Planctomycetota	1.73697	3.5	10.0694	0.145666
hx	Hyperoxia	Normoxia	g	Synechococcus_CC9902	#NAME?	-2	-3.23611	0.169327
ie	Hyperoxia	Normoxia	g	Marinicella	Inf	9	5.75	0.178095
cj	Hyperoxia	Normoxia	o	Lactobacillales	0	0	10.4444	0.197582
ck	Hyperoxia	Normoxia	o	Pseudomonadales	0	0	0.777778	0.197582
de	Hyperoxia	Normoxia	o	Microtrichales	0	0	3.33333	0.197582
do	Hyperoxia	Normoxia	o	Parvibaculales	0	0	2.77778	0.197582
eq	Hyperoxia	Normoxia	f	Oxalobacteraceae	0	0	1.11111	0.197582
es	Hyperoxia	Normoxia	f	Streptococcaceae	0	0	10.4444	0.197582
et	Hyperoxia	Normoxia	f	Pseudomonadaceae	0	0	0.777778	0.197582
fp	Hyperoxia	Normoxia	f	Actinomarinaceae	0	0	0.333333	0.197582
fs	Hyperoxia	Normoxia	f	Propionibacteriaceae	0	0	0.666667	0.197582
fv	Hyperoxia	Normoxia	f	Ilumatobacteraceae	0	0	3.33333	0.197582
gf	Hyperoxia	Normoxia	f	Parvibaculaceae	0	0	2.77778	0.197582
hi	Hyperoxia	Normoxia	g	Cognatishimia	0	0	2.88889	0.197582
hl	Hyperoxia	Normoxia	g	Streptococcus	0	0	10.4444	0.197582
hm	Hyperoxia	Normoxia	g	Pseudomonas	0	0	0.777778	0.197582
hw	Hyperoxia	Normoxia	g	Aureispira	0	0	1.22222	0.197582
ix	Hyperoxia	Normoxia	g	Candidatus_Actinomarina	0	0	0.333333	0.197582
iy	Hyperoxia	Normoxia	g	Cutibacterium	0	0	0.666667	0.197582
jb	Hyperoxia	Normoxia	g	Ilumatobacter	0	0	3.33333	0.197582
jx	Hyperoxia	Normoxia	g	Pyruvatibacter	0	0	2.77778	0.197582
ag	Hyperoxia	Normoxia	p	Actinobacteriota	1	2.5	14.4444	0.222706
ax	Hyperoxia	Normoxia	c	Actinobacteria	1	2.5	11.0278	0.222706
ij	Hyperoxia	Normoxia	g	Limimaricola	Inf	11	3.38889	0.230507
ke	Hyperoxia	Normoxia	g	Stappia	-2.73697	-34	-27.6528	0.237283
dc	Hyperoxia	Normoxia	o	Exiguobacterales	0	0	-0.527778	0.244061
ft	Hyperoxia	Normoxia	f	Exiguobacteraceae	0	0	-0.527778	0.244061
hr	Hyperoxia	Normoxia	g	Rhodopirellula	0	0	-0.916667	0.244061
iz	Hyperoxia	Normoxia	g	Exiguobacterium	0	0	-0.527778	0.244061
ee	Hyperoxia	Normoxia	f	Crocinitomicaceae	100	2	24.5972	0.257979
jm	Hyperoxia	Normoxia	g	Hyphomonas	0	0	2.72222	0.271254
cb	Hyperoxia	Normoxia	o	S-70	0	0	-1.56944	0.271784
gq	Hyperoxia	Normoxia	g	Aquibacter	0	0	15.3333	0.271784
gt	Hyperoxia	Normoxia	g	Crocinitomix	0	0	43.9583	0.271784
ct	Hyperoxia	Normoxia	o	Gammaproteobacteria_Incertae_Sedis	100	9	5	0.273609
fe	Hyperoxia	Normoxia	f	Unknown_Family	Inf	9	5	0.273609
ay	Hyperoxia	Normoxia	c	Phycisphaerae	3.32193	4.5	9.90278	0.294816
dz	Hyperoxia	Normoxia	f	Hyphomonadaceae	0	0	6.38889	0.310494
ki	Hyperoxia	Normoxia	g	Meridianimaribacter	Inf	12	-10.7778	0.324082
ai	Hyperoxia	Normoxia	p	Dependentiae	0	0	-0.0972222	0.33221
az	Hyperoxia	Normoxia	c	Babeliae	0	0	-0.0972222	0.33221
bf	Hyperoxia	Normoxia	c	Acidimicrobiia	0	0	3.41667	0.33221
cf	Hyperoxia	Normoxia	o	Babeliales	0	0	-0.0972222	0.33221
fd	Hyperoxia	Normoxia	f	Pseudoalteromonadaceae	0	0	2.51389	0.33221
id	Hyperoxia	Normoxia	g	Pseudoalteromonas	0	0	2.51389	0.33221
fk	Hyperoxia	Normoxia	f	Beijerinckiaceae	0	0	-8.27778	0.339487
ip	Hyperoxia	Normoxia	g	Methylobacterium-Methylorubrum	0	0	-8.27778	0.339487
am	Hyperoxia	Normoxia	p	Margulisbacteria	0	0	-2.5	0.345779
ao	Hyperoxia	Normoxia	p	Verrucomicrobiota	0	0	-0.5	0.345779
ar	Hyperoxia	Normoxia	p	WPS-2	0	0	-0.625	0.345779
bd	Hyperoxia	Normoxia	c	Margulisbacteria	0	0	-2.5	0.345779
bi	Hyperoxia	Normoxia	c	Verrucomicrobiae	0	0	-0.5	0.345779
bn	Hyperoxia	Normoxia	c	Vicinamibacteria	0	0	-0.625	0.345779
bo	Hyperoxia	Normoxia	c	bacteriap25	0	0	-2.375	0.345779
cw	Hyperoxia	Normoxia	o	Margulisbacteria	0	0	-2.5	0.345779
df	Hyperoxia	Normoxia	o	Opitutales	0	0	-0.5	0.345779
di	Hyperoxia	Normoxia	o	Gemmatales	0	0	-0.25	0.345779
dk	Hyperoxia	Normoxia	o	Steroidobacterales	0	0	-0.125	0.345779
ds	Hyperoxia	Normoxia	o	Subgroup_9	0	0	-0.625	0.345779
ec	Hyperoxia	Normoxia	f	Flavobacteriacea	0	0	-1.125	0.345779
ek	Hyperoxia	Normoxia	f	Lentimicrobiaceae	0	0	-2	0.345779
er	Hyperoxia	Normoxia	f	Planococcaceae	0	0	-0.625	0.345779
fh	Hyperoxia	Normoxia	f	Margulisbacteria	0	0	-2.5	0.345779
fw	Hyperoxia	Normoxia	f	Puniceicoccaceae	0	0	-0.5	0.345779
fz	Hyperoxia	Normoxia	f	Gemmataceae	0	0	-0.25	0.345779
gb	Hyperoxia	Normoxia	f	Woeseiaceae	0	0	-0.125	0.345779
ge	Hyperoxia	Normoxia	f	Kangiellaceae	0	0	-0.125	0.345779
gh	Hyperoxia	Normoxia	f	Hyphomicrobiaceae	0	0	-0.5	0.345779
gz	Hyperoxia	Normoxia	g	Microbacterium	0	0	-0.375	0.345779
hc	Hyperoxia	Normoxia	g	Lentimicrobiaceae	0	0	-2	0.345779
hk	Hyperoxia	Normoxia	g	Planococcus	0	0	-0.625	0.345779
if	Hyperoxia	Normoxia	g	Leucobacter	0	0	-0.875	0.345779
ih	Hyperoxia	Normoxia	g	Phycisphaera	0	0	-0.75	0.345779
iu	Hyperoxia	Normoxia	g	Robiginitalea	0	0	-1.75	0.345779
jc	Hyperoxia	Normoxia	g	Cerasicoccus	0	0	-0.5	0.345779
jl	Hyperoxia	Normoxia	g	Marinoscillum	0	0	-0.625	0.345779
jo	Hyperoxia	Normoxia	g	Woeseia	0	0	-0.125	0.345779
jp	Hyperoxia	Normoxia	g	Rhodobacter	0	0	-1.5	0.345779
jq	Hyperoxia	Normoxia	g	Silicimonas	0	0	-1	0.345779
jt	Hyperoxia	Normoxia	g	Kangiella	0	0	-0.125	0.345779
jv	Hyperoxia	Normoxia	g	Candidatus_Berkiella	0	0	-0.75	0.345779
jz	Hyperoxia	Normoxia	g	Ekhidna	0	0	-0.5	0.345779
kf	Hyperoxia	Normoxia	g	Filomicrobium	0	0	-0.5	0.345779
bp	Hyperoxia	Normoxia	o	Rhizobiales	-2.50143	-10891.5	-6130.35	0.370383
ic	Hyperoxia	Normoxia	g	Fabibacter	Inf	2	15.2778	0.374446
iq	Hyperoxia	Normoxia	g	Flavobacterium	0	0	34.2639	0.388769
an	Hyperoxia	Normoxia	p	Myxococcota	0	0	1.95833	0.400694
bh	Hyperoxia	Normoxia	c	OM190	0	0	0.222222	0.409395
bj	Hyperoxia	Normoxia	c	Parcubacteria	0	0	0.222222	0.409395
cx	Hyperoxia	Normoxia	o	Kordiimonadales	0	0	4.77778	0.409395
dg	Hyperoxia	Normoxia	o	Corynebacteriales	0	0	0.555556	0.409395
dh	Hyperoxia	Normoxia	o	Candidatus_Kaiserbacteria	0	0	0.222222	0.409395
dl	Hyperoxia	Normoxia	o	EC3	0	0	0.333333	0.409395
dm	Hyperoxia	Normoxia	o	Paracaedibacterales	0	0	0.333333	0.409395
fl	Hyperoxia	Normoxia	f	Kordiimonadaceae	0	0	4.77778	0.409395
fx	Hyperoxia	Normoxia	f	Nocardiaceae	0	0	0.555556	0.409395
fy	Hyperoxia	Normoxia	f	Rhodocyclaceae	0	0	0.666667	0.409395
ga	Hyperoxia	Normoxia	f	Halomonadaceae	0	0	0.555556	0.409395
gc	Hyperoxia	Normoxia	f	Paracaedibacteraceae	0	0	0.333333	0.409395
in	Hyperoxia	Normoxia	g	Pirellula	0	0	0.444444	0.409395
ir	Hyperoxia	Normoxia	g	Kordiimonas	0	0	4.77778	0.409395
je	Hyperoxia	Normoxia	g	Rhodococcus	0	0	0.555556	0.409395
jf	Hyperoxia	Normoxia	g	Actibacter	0	0	0.444444	0.409395
ji	Hyperoxia	Normoxia	g	Methyloversatilis	0	0	0.666667	0.409395
jk	Hyperoxia	Normoxia	g	Roseovarius	0	0	1.11111	0.409395
jn	Hyperoxia	Normoxia	g	Halomonas	0	0	0.555556	0.409395
ka	Hyperoxia	Normoxia	g	Ponticaulis	0	0	0.222222	0.409395
kc	Hyperoxia	Normoxia	g	Euryhalocaulis	0	0	0.888889	0.409395
ac	Hyperoxia	Normoxia	p	Proteobacteria	-0.61782	-5383.5	-2038.75	0.423447
as	Hyperoxia	Normoxia	c	Alphaproteobacteria	-0.928712	-7276.5	-2459.71	0.423447
be	Hyperoxia	Normoxia	c	Sericytochromatia	1.36864	62.5	377.403	0.423447
da	Hyperoxia	Normoxia	o	Sericytochromatia	1.36864	62.5	377.403	0.423447
dv	Hyperoxia	Normoxia	f	Stappiaceae	-3.93965	-11949	-6339.74	0.423447
fo	Hyperoxia	Normoxia	f	Sericytochromatia	1.36864	62.5	377.403	0.423447
gj	Hyperoxia	Normoxia	g	Labrenzia	-4.05373	-11799	-6185.17	0.423447
iw	Hyperoxia	Normoxia	g	Sericytochromatia	1.36864	62.5	377.403	0.423447
cs	Hyperoxia	Normoxia	o	Alteromonadales	100	1	9.44444	0.43455
ae	Hyperoxia	Normoxia	p	Cyanobacteria	1.01421	51.5	373.292	0.480708
cv	Hyperoxia	Normoxia	o	Candidatus_Peregrinibacteria	0	0	3.40278	0.518027
hs	Hyperoxia	Normoxia	g	Marixanthomonas	Inf	5	3.13889	0.531582
fc	Hyperoxia	Normoxia	f	Marinobacteraceae	0	0	2.75	0.534371
ib	Hyperoxia	Normoxia	g	Marinobacter	0	0	2.75	0.534371
fr	Hyperoxia	Normoxia	f	Crocinitomicaceaea	0	0	1.63889	0.562804
ht	Hyperoxia	Normoxia	g	Owenweeksia	0	0	4.875	0.591068
hf	Hyperoxia	Normoxia	g	Cohaesibacter	-0.584963	-8	-7.59722	0.592066
gu	Hyperoxia	Normoxia	g	Maritalea	-0.872539	-56.5	259.486	0.605841
cz	Hyperoxia	Normoxia	o	Micavibrionales	0	0	0.736111	0.612614
fn	Hyperoxia	Normoxia	f	Micavibrionaceae	0	0	0.736111	0.612614
jj	Hyperoxia	Normoxia	g	Aquimarina	0	0	-0.111111	0.612614
bl	Hyperoxia	Normoxia	c	Kapabacteria	0	0	2.25	0.66428
dp	Hyperoxia	Normoxia	o	Kapabacteriales	0	0	2.25	0.66428
gg	Hyperoxia	Normoxia	f	Kapabacteriales	0	0	2.25	0.66428
jy	Hyperoxia	Normoxia	g	Kapabacteriales	0	0	2.25	0.66428
du	Hyperoxia	Normoxia	f	Cryomorphaceae	-100	-2	4.48611	0.715164
db	Hyperoxia	Normoxia	o	Actinomarinales	0	0	0.0833333	0.717219
aj	Hyperoxia	Normoxia	p	Patescibacteria	0	0	51.4444	0.721968
ba	Hyperoxia	Normoxia	c	Gracilibacteria	0	0	51.2222	0.721968
bz	Hyperoxia	Normoxia	o	Legionellales	0.0955777	5	320.708	0.734707
ei	Hyperoxia	Normoxia	f	Legionellaceae	0.0955777	5	320.708	0.734707
eb	Hyperoxia	Normoxia	f	Rhizobiaceae	0.306661	9	5.51389	0.735652
af	Hyperoxia	Normoxia	p	Firmicutes	0.480626	17	-6011.01	0.742986
aw	Hyperoxia	Normoxia	c	Bacilli	0.480626	17	-6011.01	0.742986
fb	Hyperoxia	Normoxia	f	NS9_marine_group	0	0	-0.125	0.778341
hn	Hyperoxia	Normoxia	g	Salinirepens	0	0	-19.3611	0.778341
ju	Hyperoxia	Normoxia	g	Euzebyella	0	0	-2.05556	0.778341
ha	Hyperoxia	Normoxia	g	Legionella	0.0489096	2	324.667	0.808741
dt	Hyperoxia	Normoxia	f	Devosiaceae	-1.53973	-154.5	215.542	0.814809
ap	Hyperoxia	Normoxia	p	Bdellovibrionota	0	0	-0.611111	0.821688
bk	Hyperoxia	Normoxia	c	Oligoflexia	0	0	-0.611111	0.821688
dn	Hyperoxia	Normoxia	o	Oligoflexales	0	0	-0.611111	0.821688
gd	Hyperoxia	Normoxia	f	Oligoflexales	0	0	-0.611111	0.821688
jr	Hyperoxia	Normoxia	g	Pseudobacteriovorax	0	0	-0.611111	0.821688
gr	Hyperoxia	Normoxia	g	NS5_marine_group	-0.280108	-3	2.88889	0.921648
cr	Hyperoxia	Normoxia	o	Xanthomonadales	0	0	-0.138889	0.931547
fa	Hyperoxia	Normoxia	f	Xanthomonadaceae	0	0	-0.138889	0.931547
gm	Hyperoxia	Normoxia	g	Yangia	0	0	-4.43056	0.931547
hv	Hyperoxia	Normoxia	g	Nitratireductor	0	0	-0.638889	0.931547
hz	Hyperoxia	Normoxia	g	Stenotrophomonas	0	0	-0.138889	0.931547
js	Hyperoxia	Normoxia	g	Tropicimonas	0	0	-1.875	0.931547
kd	Hyperoxia	Normoxia	g	Polaribacter	0	0	-0.652778	0.931547
kj	Hyperoxia	Normoxia	g	Sphingopyxis	0	0	-0.694444	0.931547
bv	Hyperoxia	Normoxia	o	Coxiellales	0	0	1.91667	0.948457
ci	Hyperoxia	Normoxia	o	Puniceispirillales	0	0	2.02778	0.948457
co	Hyperoxia	Normoxia	o	Reyranellales	0	0	2.81944	0.948457
ed	Hyperoxia	Normoxia	f	Coxiellaceae	0	0	1.91667	0.948457
ep	Hyperoxia	Normoxia	f	SAR116_clade	0	0	2.02778	0.948457
ex	Hyperoxia	Normoxia	f	Reyranellaceae	0	0	2.81944	0.948457
gs	Hyperoxia	Normoxia	g	Coxiella	0	0	1.91667	0.948457
hu	Hyperoxia	Normoxia	g	Reyranella	0	0	2.81944	0.948457
bb	Hyperoxia	Normoxia	c	Planctomycetes	0	0	-0.0555556	0.955068
ab	Hyperoxia	Normoxia	k	Bacteria	0	0	0	1
bx	Hyperoxia	Normoxia	o	Staphylococcales	0	0	0.180556	1
cg	Hyperoxia	Normoxia	o	Cytophagales	-1.16993	-2.5	12.2778	1
cl	Hyperoxia	Normoxia	o	JGI_0000069-P22	0	0	0.208333	1
cn	Hyperoxia	Normoxia	o	Pirellulales	0	0	0.194444	1
dj	Hyperoxia	Normoxia	o	Oceanospirillales	0	0	0.430556	1
eg	Hyperoxia	Normoxia	f	Staphylococcaceae	0	0	0.180556	1
em	Hyperoxia	Normoxia	f	Babeliales	0	0	0.527778	1
en	Hyperoxia	Normoxia	f	Cyclobacteriaceae	-1.16993	-2.5	12.2778	1
ew	Hyperoxia	Normoxia	f	Pirellulaceae	0	0	0.194444	1
fj	Hyperoxia	Normoxia	f	Idiomarinaceae	0	0	0.291667	1
gp	Hyperoxia	Normoxia	g	Roseitalea	0	0	-2.09722	1
gy	Hyperoxia	Normoxia	g	Staphylococcus	0	0	0.180556	1
he	Hyperoxia	Normoxia	g	Babeliales	0	0	0.527778	1
io	Hyperoxia	Normoxia	g	Idiomarina	0	0	0.291667	1
jd	Hyperoxia	Normoxia	g	Sphingorhabdus	0	0	1.06944	1
kh	Hyperoxia	Normoxia	g	SAR116_clade	0	0	0.430556	1
